# Supplementary material for: Iron deficiency, its epidemiological features and feeding practices among infants aged 12 months in Qatar: a cross-sectional study
Source: PubMed Central journal article supplement — BMJ Open. 2018 May 9;8(5):e020271. doi: 10.1136/bmjopen-2017-020271 (PMC5942447; doi:10.1136/bmjopen-2017-020271), 2018-05-09
Supplement: bmjopen-2017-020271.draft_revisions.pdf [file bmjopen-2017-020271.draft_revisions.pdf]

# BMJ Open

BMJ Open is committed to open peer review. As part of this commitment we make the peer review history of every article we publish publicly available.

When an article is published we post the peer reviewers' comments and the authors' responses online. We also post the versions of the paper that were used during peer review. These are the versions that the peer review comments apply to.

The versions of the paper that follow are the versions that were submitted during the peer review process. They are not the versions of record or the final published versions. They should not be cited or distributed as the published version of this manuscript.

BMJ Open is an open access journal and the full, final, typeset and author-corrected version of record of the manuscript is available on our site with no access controls, subscription charges or pay-per-view fees (<http://bmjopen.bmj.com>).

If you have any questions on BMJ Open's open peer review process please email [info.bmjopen@bmj.com](mailto:info.bmjopen@bmj.com)

# BMJ Open

## Iron deficiency, its epidemiological features and feeding practices among infants aged 12 months in Qatar, a cross-sectional study

|                                 |                                                                                                                                                                                                                                                                                                                                                                                                                                        |
|---------------------------------|----------------------------------------------------------------------------------------------------------------------------------------------------------------------------------------------------------------------------------------------------------------------------------------------------------------------------------------------------------------------------------------------------------------------------------------|
| Journal:                        | <i>BMJ Open</i>                                                                                                                                                                                                                                                                                                                                                                                                                        |
| Manuscript ID                   | bmjopen-2017-020271                                                                                                                                                                                                                                                                                                                                                                                                                    |
| Article Type:                   | Research                                                                                                                                                                                                                                                                                                                                                                                                                               |
| Date Submitted by the Author:   | 29-Oct-2017                                                                                                                                                                                                                                                                                                                                                                                                                            |
| Complete List of Authors:       | Zainel, A.Jaleel; Primary Health Care Corporation, Clinical Affairs<br>Osman, Sherif ; Alexandria University High Institute of Public Health;<br>Primary Health Care Corporation, Family and Community Medicine<br>Al-Kohji, Sadriya; Primary Health Care Corporation, Service Development<br>Selim, Nagah; Cairo University, Public Health and Preventive Medicine;<br>Primary Health Care Corporation, Family and Community Medicine |
| <b>Primary Subject Heading</b>: | Epidemiology                                                                                                                                                                                                                                                                                                                                                                                                                           |
| Secondary Subject Heading:      | Public health                                                                                                                                                                                                                                                                                                                                                                                                                          |
| Keywords:                       | iron deficiency, feeding, infants, Qatar                                                                                                                                                                                                                                                                                                                                                                                               |
|                                 |                                                                                                                                                                                                                                                                                                                                                                                                                                        |

SCHOLARONE™  
Manuscripts

1  
2  
3 **Iron deficiency, its epidemiological features and feeding practices among infants aged 12**  
4 **months in Qatar, a cross-sectional study**  
5  
6  
7

8  
9 **Corresponding author and PI:**

10 **Dr. Abdul Jaleel Zainel** MBBch, ABCM

11  
12 Community Medicine Specialist, Primary Health Care Corporation, Doha, Qatar

13  
14 E-mail: azainel@phcc.gov.qa

15  
16 P.O. Box 55772, Doha, Qatar

17  
18 Cell phone: + (974) 5508 7676  
19

20 **CO-PIs:**

21  
22 **Dr. Sherif R. Omar** MBBch, DPH, DM, FRCP, DTM&H, DrPH

23  
24 Associate Professor of Public and Tropical Health, High Institute of Public Health, University of  
25 Alexandria, Egypt / Community Medicine Consultant, Primary Health Care Corporation, Doha, Qatar

26  
27 E-mail: shosman@phcc.gov.qa / sherif\_omar67@yahoo.com

28  
29 Office phone: + (974) 4407 0371, Cell phone: + (974) 3375 1401  
30

31 **Dr. Sadriya Al Kohji** MBBch, ABCM

32  
33 Community Medicine Consultant, Primary Health Care Corporation, Doha, Qatar

34  
35 E-mail: salkohji@phcc.gov.qa

36  
37 Cell phone: + (974) 5581 2292

38 **Dr. Nagah A. Selim** MBBch, MPH, PhD

39  
40 A / Professor of Public Health and Preventive Medicine, Cairo University, Egypt /Associate Program  
41 Director, Community Medicine Residency Program, Primary Health Care Corporation, Doha, Qatar

42  
43 E-mail: nselim@phcc.gov.qa

44  
45 Office phone: + (974) 4407 0341, Cell phone: + (974) 6608 3921  
46  
47

48  
49 **WORD COUNT**

50  
51 4661 words  
52  
53  
54  
55  
56  
57  
58  
59  
60

## Abstract

**Objectives** To estimate the magnitude of anemia, iron deficiency (ID), iron deficiency anemia (IDA) and to explore epidemiological features of ID and feeding practices among infants aged 12 months in Qatar.

**Setting** Well baby clinics in 14 randomly selected primary health care centers covering all geographical areas on the national level.

**Participants** Three hundred and six (163 male and 143 female) infants of all nationalities were enrolled. Mothers were asked to complete a predesigned interview questionnaire and infants were blood tested against anemia, ID and IDA.

**Outcome measures** Cutoff point used to diagnose anemia was Hb <11.1g/dl, and to diagnose ID, serum ferritin (SF) <6 ug/l with normal C-reactive protein.

**Results** Prevalence of anemia was 23.5%, ID was 9.2% and IDA was 7.8%. ID was more prevalent among non-Qatari infants compared to Qatari (10.9% vs. 1.7%,  $p=0.029$ ), more prevalent among infants born to housewives and to families of low income ( $p=0.00$ ). In regard to feeding practice; ID was higher in infants who continued breastfeeding till the age of one year and among those never took infant formula milk ( $p=0.00$ ). Mothers received infant feeding counseling had less ID occurrence among their infants compared to their counterparts who did not receive such counseling (4.2% vs. 13.4%,  $p=0.005$ ).

**Conclusion:** Although ID and IDA among infants in Qatar are less prevalent compared with many developing countries, still further efforts should be spent to be compared with the developed. Efforts should target the revealed epidemiological features with special emphasis on infant feeding and infant feeding counselling to mothers.

**Key words:** Iron, Anemia, Prevalence, feeding, 12 months infants, Qatar

## Strengths and limitations of this Study

- The first population-based study about ID and IDA among infants in Qatar.
- Covering a critical age of infancy (12 months) where feeding and weaning practices can influence the health and wellbeing of the child.
- Being a cross-sectional study where temporality cannot be demonstrated.
- Possibility of recall bias may undermine the results.
- Difference in the applied diagnostic criteria and laboratory cutoff values in identification of anemia, ID and IDA across different studies; limits the ability of a precise comparison.

## Introduction

Newborns, infants and young children are vulnerable to anemia especially iron deficiency anemia, which represents a public health problem with defined impacts on the health of communities especially in developing countries.[1] Accumulated evidence suggests that early infant feeding practices play a major role in the prevalence of iron deficiency (ID) and iron deficiency anemia

### What is already known on this subject?

Iron deficiency and the resultant anemia are common in children by the age of one year especially in developing countries. Both conditions are related to a group of epidemiological features, many of them are modifiable including feeding practices during the first year.

### What does this study add?

First study to explore prevalence and determinants of iron deficiency among children aged 12 months in the State of Qatar.

1  
2  
3 (IDA).[2,3] Anemia early in life, with or without iron depletion, is known to seriously affect children's  
4 general health and immunity, retarding their growth and development by causing multiple disorders and  
5 abnormalities in different body systems.[3-5]  
6

7  
8 Anemia is a condition in which the number of red blood cells or their oxygen-carrying capacity  
9 decreased until insufficient level to meet physiologic needs, which vary by age, sex and altitude. In  
10 different words anemia is a hemoglobin (Hb) concentration 2 standard deviation (SD) below the mean Hb  
11 concentration for a normal population of the same gender and age range.[3,6] IDA is a preventable and a  
12 treatable condition, therefore, early diagnosis represents the cornerstone in protection from its adverse  
13 consequences, together with combat of its contributing factors.  
14

15  
16 Globally, ID is the most common and widespread nutritional disorder. It can affect all age groups  
17 particularly children in the developing countries where its prevalence can be up to 50% among 12 months  
18 aged infants in some countries, it is the only nutrient deficiency which is also significantly prevalent in  
19 industrialized countries. IDA is a leading cause of mortality and morbidity among infants worldwide,  
20 with some of its manifestations possibly irreversible.[7-14] In a systematic review done in 2012 to  
21 evaluate micronutrient deficiencies and food fortification in the Middle East; ID represented one of the  
22 three commonest micronutrients deficiencies in the region in addition to iodine and vitamin A.[15]  
23 According to the World Health Organization (WHO) in 2013; 63% of children under-5 in the Eastern  
24 Mediterranean Region had IDA. In some studies; anaemia among preschool children showed similar high  
25 rates.[16]  
26  
27

28  
29 Regarding the sources and bioavailability of iron, the transfer of iron from the mother to fetus occurs  
30 mainly during the third trimester of pregnancy and is stored mainly in the liver and bone marrow. Thus,  
31 the amount of iron present at birth depends on the gestational age and the weight of the baby.[17] Full  
32 term Infants usually have sufficient iron stores until 4 to 6 months of age. During the first months of life,  
33 human milk (which contains 0.2–0.3 mg/L of iron) does not provide enough iron to meet the demands of  
34 the rapid growth and erythropoiesis; therefore, iron stores are mobilized to meet the iron requirements of  
35 the infant mostly around the age of 4-6 months. This resulted in iron stores being generally depleted by  
36 the age of 6 months, yet from 4 to 12 months after birth the infant's blood volume doubles. Thus, at this  
37 age, dietary sources of iron become critical to keep up with this rapid rate of growth and red blood cells  
38 synthesis.[18-22]  
39

40  
41  
42 Studies have shown that children below two years have an increased nutritional requirements  
43 because of their growth spurt, which often leads to a negative nutrient balance.[3,11,50] In general,  
44 prolonged exclusive breastfeeding (more than 6 months) causes decrease in dietary iron intake and may  
45 lead to iron depletion.[18,23] Male *et al.* in 2001 indicated that feeding with iron-fortified formula was  
46 the main factor positively influencing iron status among 12 months infants, as well as, positive  
47 association with consumption of cereals and iron supplements.[24] Inadequate complementary feeding  
48 practices represent an important risk factor for IDA. These are characterized by consumption of foods  
49 with low amounts of bio-available iron or foods with inhibitors to iron absorption, and these practices  
50 often extend up to the age of 2years.[18,25]  
51

52  
53  
54 Infant feeding counseling offered to mothers and other caregivers on how to gradually increase  
55 consistency, quantity and frequency of foods; assist in prevention of micronutrient deficiency.[26,27]  
56 Preterm babies, as well as, those born small for gestational age, are particularly vulnerable to ID in their  
57  
58  
59  
60

1  
2  
3 first months of life.[2,28,29] Infants Delivered by cesarean section are more likely to get ID, as their  
4 delivery was associated with reduced placental transfusion and poor iron-related hematologic indices in  
5 both cord and peripheral blood.[30]  
6  
7

8 Prevention and control strategies against IDA are mainly depending on the time of diagnosis and start  
9 of treatment.[7] The WHO has developed a “Global Strategy for Infant and Young Child Feeding” in  
10 order to prevent the development of micronutrient deficiencies including ID and IDA.[26] Many studies  
11 indicated that incidence of IDA has significantly decreased over time due to promotion of breastfeeding,  
12 improvement of overall nutritional status and use of iron-fortified baby foods.[31,32]  
13  
14

15 Qatar is a small Arab league State, located in the mid-west bank of the Arabian Gulf, with oil and gas  
16 as the main source of wealth, making it the country with number one per capita income worldwide. Most  
17 of the population is formed of foreign expats and their families, up to more than 80%. In Qatar, Primary  
18 Health Care Corporation (PHCC) is the main provider of primary services through its 23 centers on the  
19 national scale. Although Well Baby Clinic (WBC) services at these centers include routine screening for  
20 anemia at the age of 12 months during MMR vaccination visit, but not against ID or IDA.[8] Previous  
21 studies in Qatar have focused on the extent of anemia but not specifically on ID or IDA in this age group.  
22 This study investigated the prevalence and correlates of ID and IDA among infants aged 12 months, as  
23 well as, their feeding practices among all nationalities residing in the state. Recruiting participants from  
24 WBCs at the PHCC centers is nationally representative, since the utilization of services for periodic  
25 health appraisal and scheduled vaccination at 12 month of age is as high as 100%.  
26  
27  
28  
29

## 30 **Methods**

31  
32 A cross sectional study was conducted at WBCs in PHCC centers, these clinics provide  
33 comprehensive evidence-based services to all under-5 children. Out of the 23 PHCC centers on the  
34 national scale, 14 were randomly selected. Infants in the WBC appointment system who attended the  
35 selected centers seeking WBC services for the 12 months visit and met the eligibility criteria have been  
36 included in the study sample. Mothers of all participating infants signed an informed consent.  
37  
38

39 **Eligibility criteria:** Males and females, Qatari and non-Qatari infants, attending the WBCs during the 12  
40 months visit. All participants later proved to suffer sickle cell anemia or thalassemia were excluded.  
41

42 **Sample size calculation and sampling technique:** As local information about ID is scarce, the latest  
43 known prevalence of ID in the nearest regional country (The United Arab Emirates) has been used  
44 (prevalence of 26%).[29] The level of confidence used was 95% and 5% error rate. The estimated sample  
45 size based was 350 after rounding. Systematic random sampling technique was used to recruit study  
46 participants. Sampling frame of the current study utilized the daily appointment list in WBCs. The study  
47 took place in the period between September 2014 and May 2015.  
48

49 **Study variables:** Dependent variables were *Iron deficiency (ID)* defined as Serum Ferritin (SF) below  
50 normal reference range (6-24 ug/L) in absence of high C-Reactive Protein (CRP).[3,33] *Iron deficiency*  
51 *anemia (IDA)* defined by combination of three elements; Hb <11.1 g/dl (normal reference range is 11.1-  
52 14.1 g/dl), low SF (<6 mcg/L) and absence of high CRP (reference level is normally less than 5  
53 mg/L).[3,6,33,34] Independent variables included socio-demographic characteristics of infants and their  
54 parents, birth history of the participant, history of maternal pregnancies, breastfeeding, intake of infant  
55 formula milk, frequency of consumption of different food groups, iron supplementation, infant feeding  
56 counseling to mothers, as well as, body mass index (BMI) calculation.  
57  
58  
59  
60

1  
2  
3  
4  
5  
6  
7  
8  
9  
10  
11  
12  
13  
14  
15  
16  
17  
18  
19  
20  
21  
22  
23  
24  
25  
26  
27  
28  
29  
30  
31  
32  
33  
34  
35  
36  
37  
38  
39  
40  
41  
42  
43  
44  
45  
46  
47  
48  
49  
50  
51  
52  
53  
54  
55  
56  
57  
58  
59  
60

**Data collection tools:** Interviewer administered questionnaire developed by the research team, anthropometric measurements of participants to calculate BMI and data abstraction sheet used for data collection of laboratory results. Blood samples were collected routinely by WBCs from 12 months aged infants as per their protocol to check for anemia, further laboratory studies utilizing these samples for the current study were done in hematology labs of Hamad Medical Corporation (HMC), the main secondary care provider in Qatar.

**Data analysis:** Data entry and analysis utilized the Statistical Package for Social Sciences IBM-SPSS<sup>®</sup> version 20. Descriptive analysis was done, e.g. *frequency distribution tables, proportions, mean and standard deviation*, in addition to analytical statistics, e.g. *Chi-square test / fisher exact probability test* used to assess differences between two or more proportions and the *Student t test* was used to compare continuous variables. An *Alpha (p)* value of  $\leq 0.05$  was used as the cut-off level of significance.

**Quality control measures:** The questionnaire was pre-tested utilizing a convenient sample of 20 infants; their data was later omitted prior to analysis. Content and face validity were established by extensive literature review, consultation of community medicine academic faculty and expert in the fields of hematology and pediatrics. The main researchers did all data entry and review. Standardized methods of blood collection and automated measures for blood analysis used to ensure reliability of the study results.

**Ethical considerations:** Approvals were obtained prior to fieldwork from ethical review boards of PHCC and HMC. Permission of PHCC center directors was granted, as well as, the participating mothers. Privacy and confidentiality of participant's data was assured. Mothers were invited to participate voluntarily and can withdraw at any time.



## Results

Final study sample actually enrolled was three hundred and six (n=306) giving response rate of 87.4%. **Figure (1)** demonstrates the prevalence of the dependent variables.

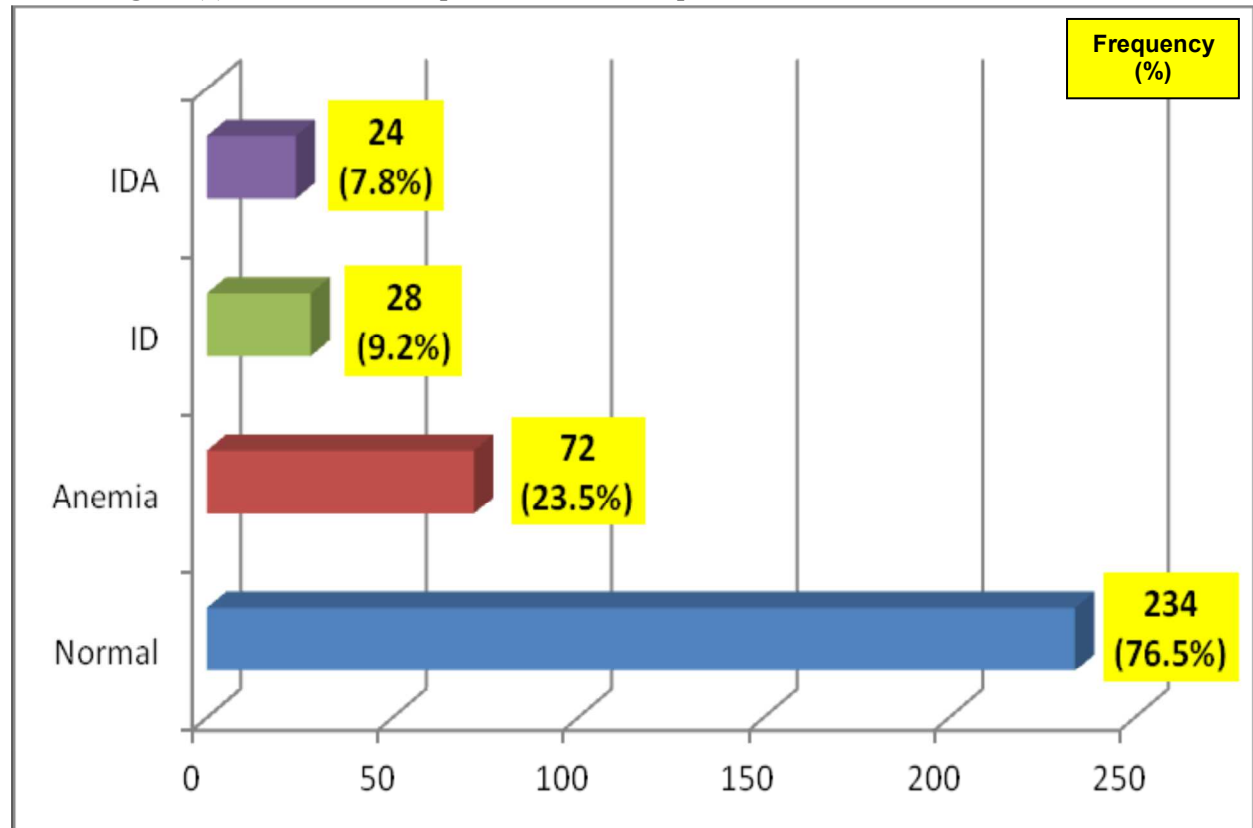

**Figure (1):** Distribution of study infants according to their anemia, iron deficiency and iron deficiency anemia status, well-baby clinics at primary health care centers, Qatar, n=306

As seen in **Table (1)**, when we assessed the relation between ID and background characteristics of the participated infants, it was found that ID is more common in males but the relation was not statistically significant. This study indicated a statistically significant higher prevalence of ID among Non-Qatari infants compared to their Qatari counterparts.

**Table (1):** Relation between ID among the study infants and their background characteristics, well-baby clinics at primary health care centers, Qatar, n=306

| Characteristic         | No ID (%)  | ID (%)    | Total | X <sup>2</sup> | p value       |
|------------------------|------------|-----------|-------|----------------|---------------|
| <b>Gender</b>          |            |           |       |                |               |
| Male                   | 146 (89.6) | 17 (10.4) | 163   | 0.686          | 0.265         |
| Female                 | 132 (92.3) | 11 (7.7)  | 143   |                |               |
| <b>Nationality</b>     |            |           |       |                |               |
| Qatari                 | 57 (98.3)  | 1 (1.7)   | 58    | 4.748          | <b>0.029*</b> |
| Non Qatari             | 221 (89.1) | 27 (10.9) | 248   |                |               |
| <b>Gestational age</b> |            |           |       |                |               |
| Pre-term (< 37 weeks)  | 23 (88.5)  | 3 (11.5)  | 26    | 0.195          | 0.433         |
| Full-term (≥ 37 weeks) | 255 (91.1) | 25 (8.9)  | 280   |                |               |



|                                        |            |           |     |       |       |
|----------------------------------------|------------|-----------|-----|-------|-------|
| <b>Birth weight</b>                    |            |           |     |       |       |
| Low (< 2500 grams)                     | 18 (90)    | 2 (10.0)  | 20  | 0.019 | 0.565 |
| Normal (≥ 2500 grams)                  | 260 (90.9) | 26 (9.1)  | 286 |       |       |
| <b>Mode of child delivery</b>          |            |           |     |       |       |
| Normal                                 | 183 (91.5) | 17 (8.5)  | 200 | 0.294 | 0.364 |
| Caesarean section                      | 95 (89.6)  | 11 (10.4) | 106 |       |       |
| <b>Twins, triple or multiple birth</b> |            |           |     |       |       |
| No                                     | 270 (90.6) | 28 (9.4)  | 298 | 0.827 | 0.460 |
| Yes, twins                             | 8 (100)    | 0 (0)     | 8   |       |       |

\* $p < 0.05$

Regarding the background characteristics of parents, the relation of ID with mother's employment status and the family income were statistically significant, as seen in **Table (2)**.

**Table (2): Relation between ID among study infants and their parents background characteristics, well-baby clinics at primary health care centers, Qatar, n=306**

| Characteristic                                              | No ID (%)  | ID (%)    | Total | $X^2$  | $p$ value     |
|-------------------------------------------------------------|------------|-----------|-------|--------|---------------|
| <b>Mother's age</b>                                         |            |           |       |        |               |
| ≤ 25 years                                                  | 55 (88.7)  | 7 (11.3)  | 62    | 0.778  | 0.678         |
| 26 – 35 years                                               | 182 (91.9) | 16 (8.1)  | 198   |        |               |
| More than 35 years                                          | 41 (89.1)  | 5 (10.9)  | 46    |        |               |
| <b>Number of mother's pregnancy (including miscarriage)</b> |            |           |       |        |               |
| < 4                                                         | 187 (91.2) | 18 (8.8)  | 205   | 0.102  | 0.749         |
| > 4                                                         | 91 (90.1)  | 10 (9.9)  | 101   |        |               |
| <b>Mother's education level</b>                             |            |           |       |        |               |
| Illiterate                                                  | 6 (75.0)   | 2 (25.0)  | 8     | 3.598  | 0.165         |
| Up to secondary school                                      | 91 (93.8)  | 6 (6.2)   | 97    |        |               |
| University educated and above                               | 181 (90.0) | 20 (10.0) | 201   |        |               |
| <b>Father's education level</b>                             |            |           |       |        |               |
| Up to secondary school                                      | 93 (93.0)  | 7 (7.0)   | 100   | 0.826  | 0.246         |
| University educated and above                               | 185 (89.8) | 21 (10.2) | 206   |        |               |
| <b>Mother's employment status</b>                           |            |           |       |        |               |
| Housewife                                                   | 186 (87.3) | 27 (12.7) | 213   | 10.480 | <b>0.000*</b> |
| Working job                                                 | 92 (98.9)  | 1 (1.1)   | 93    |        |               |
| <b>Father's occupation</b>                                  |            |           |       |        |               |
| Manual worker                                               | 31 (91.2)  | 3 (8.8)   | 34    | 1.904  | 0.593         |
| Clerk/administrative                                        | 85 (87.6)  | 12 (12.4) | 97    |        |               |
| Professional                                                | 118 (92.9) | 9 (7.1)   | 127   |        |               |
| Others                                                      | 44 (91.7)  | 4 (8.3)   | 48    |        |               |
| <b>Total number of children in the family</b>               |            |           |       |        |               |
| 1                                                           | 81 (94.2)  | 5 (5.8)   | 86    | 2.140  | 0.343         |
| 2-3                                                         | 134 (90.5) | 14 (9.5)  | 148   |        |               |
| More than 3                                                 | 63 (87.5)  | 9 (12.5)  | 72    |        |               |
| <b>Family income in Qatari Riyals (QR)</b>                  |            |           |       |        |               |
| Up to 10000 QR                                              | 107 (82.9) | 22 (17.1) | 129   | 17.369 | <b>0.000*</b> |
| 10001-20000 QR                                              | 99 (95.2)  | 5 (4.8)   | 104   |        |               |
| More than 20000 QR                                          | 72 (98.6)  | 1 (1.4)   | 73    |        |               |

\* $p < 0.05$

Table (3) shows several statistically significant relations when we studied the association between ID in infants and their feeding practice and iron supplementation.

**Table (3): Relation between ID among the studied infants and their feeding practice, well-baby clinics at primary health care centers, Qatar**

| Characteristic                                                           | No ID (%)  | ID (%)    | Total | X <sup>2</sup> | p value       |
|--------------------------------------------------------------------------|------------|-----------|-------|----------------|---------------|
| <b>Exclusive breastfeeding for 6 months</b>                              |            |           |       |                |               |
| Yes                                                                      | 51 (81.0)  | 12 (19.0) | 63    | 7.915          | <b>0.007*</b> |
| No                                                                       | 208 (92.9) | 16 (7.1)  | 224   |                |               |
| <b>Frequency of breastfeeding</b>                                        |            |           |       |                |               |
| All or almost all feeds                                                  | 142 (86.1) | 23 (13.9) | 165   | 8.893          | <b>0.012*</b> |
| About half of all feeds                                                  | 76 (93.8)  | 5 (6.2)   | 81    |                |               |
| Few feeds since was born                                                 | 41 (100.0) | 0 (0)     | 41    |                |               |
| <b>Continuation of breastfeeding at one year</b>                         |            |           |       |                |               |
| Yes                                                                      | 115 (82.7) | 24 (17.3) | 139   | 17.268         | <b>0.000*</b> |
| No                                                                       | 144 (97.3) | 4 (2.7)   | 148   |                |               |
| <b>Breastfeeding intake within the last 24 hours</b>                     |            |           |       |                |               |
| Yes                                                                      | 112 (82.4) | 24 (17.6) | 136   | 18.281         | <b>0.000*</b> |
| No                                                                       | 147 (97.4) | 4 (2.6)   | 151   |                |               |
| <b>Ever take infant formula milk (n= 306)</b>                            |            |           |       |                |               |
| Yes                                                                      | 225 (95.3) | 11 (4.7)  | 236   | 25.011         | <b>0.000*</b> |
| Never                                                                    | 53 (75.7)  | 17 (24.3) | 70    |                |               |
| <b>Age at introducing of any solid, semi-solid or soft food (n= 306)</b> |            |           |       |                |               |
| Less than 6 months                                                       | 72 (91.1)  | 7 (8.9)   | 79    | 0.011          | 0.917         |
| 6 months or more                                                         | 206 (90.7) | 21(9.3)   | 227   |                |               |
| <b>Ever take iron supplementation (n= 306)</b>                           |            |           |       |                |               |
| Yes                                                                      | 27 (96.4)  | 1 (3.6)   | 28    | 1.154          | 0.283         |
| No                                                                       | 251 (90.3) | 27 (9.7)  | 278   |                |               |

\*p< 0.05

The differences in mean frequency of consumption for different groups of food is seen in **Table (4)**, where infants suffered ID consumed less plants rich in iron, and the difference was statistically significant. The difference was not significant when studying animal sources of iron and overall score of food frequency.

**Table (4): Relation between ID among the studied infants and their food frequency score, well-baby clinics at primary health care centers, Qatar, n=306**

| Food item             | Mean ± SD  |             | Student's <i>t</i> test | <i>p</i> value |
|-----------------------|------------|-------------|-------------------------|----------------|
|                       | No ID      | ID          |                         |                |
| Overall score         | 21.2 ± 3.9 | 19.89 ± 4.0 | 1.64                    | 0.12           |
| Animal Source of iron | 7.9 ± 2.3  | 7.9 ± 2.2   | 0.02                    | 0.98           |
| Plant source of iron  | 13.2 ± 2.8 | 11.9 ± 2.7  | 2.26                    | <b>0.03*</b>   |

\* $p < 0.05$

When the relation between ID and infant feeding counseling to the mothers was assessed, it found that there is a significant relation between receiving counseling and ID occurrence, as the prevalence of ID was higher among infants to mothers didn't receive feeding counseling compared to infants of mothers received such counseling (13.4 against 4.2%) respectively, with ( $\chi^2 = 7.731$  and  $p = 0.005$ ).

According to the BMI for age based on z-score, ID prevalence was variable among different BMI groups. It was as high as (16.7%) among wasted/severely wasted infants, and as low as (5.6%) among the overweight/obese group of infants. These relations were insignificant statistically ( $\chi^2 = 1.007$  and  $p = 0.799$ ).

## Discussion

This is the first population-based descriptive epidemiological study to estimate the prevalence and associated factors of ID and IDA in infants in Qatar. The current study revealed that the prevalence of anemia, iron deficiency and iron deficiency anemia among infants was 23.5%, 9.2% and 7.8% respectively, which is much lower than the published global prevalence. [35]

Comparing the prevalence rate of anemia in the current study with the figures published in other countries of the Eastern Mediterranean Region (EMR), shows that many of these countries suffer even higher burden, WHO report, 2013 showed also no improvement in the overall anaemia situation among the pre-schooler where 63% of children under the age of 5 years had iron deficiency anaemia. [16, 36]

The prevalence of anemia, ID and IDA in our study was also lower than in the United Arab Emirates, Kuwait and Saudi Arabia [29, 37, 38]. A study conducted in Raparin teaching hospital for children in Erbil - Iraq, 2007, among infants aged (12 - 24) months, showed that the prevalence of iron deficiency

1  
2  
3 ranged between 51.9% and 48.1% respectively. It also showed that about 53% and 30 % of participants  
4 had anemia and iron deficiency anemia respectively. [39] These high prevalence rates seen compared to  
5 the current work might be attributed to a lower cut-off level used for diagnosis or the possibility of  
6 improvement in the figures , if there is recent studies in the aforementioned countries. In addition , Qatar  
7 has implemented a well-developed comprehensive well baby program at primary health care centers. In  
8 a research done in Ain Shams University Children's Hospital, Egypt in 2011, studying three hundred poor  
9 Egyptian infants, anemia diagnosed in 66% of the participants aged between 6 and 24 months, and among  
10 them, 43% had iron deficiency anemia [40], this high prevalence rate may be referred to the selection of a  
11 high-risk group to be studied. Similar results were seen in Kassala, Eastern Sudan where up to 86% of  
12 young children less than three years of age living were diagnosed with iron deficiency anemia.[41]  
13  
14  
15  
16

17 On the other hand , the prevalence of anemia, iron deficiency and iron deficiency anemia detected in  
18 the present study is still behind compared to many developed countries. Male C *et al*, 2001 showed that  
19 the prevalence of anemia, ID and IDA was 9.4% ,7.2% and 2.3% respectively. [24] The difference in  
20 prevalence compared to the current study may be attributed to the cut-off point of SF, the eligibility  
21 criteria and/or the disease determinants between the two populations. In a study from the Republic of  
22 Estonia performed between July 2002 to March 2005 and included 171 infants aged 9 to 12 months,  
23 showed the prevalence of ID and IDA was 14.0% and 9.4, % respectively they utilized a cutoff value for  
24 Hb of <10.5 g/dl and for serum ferritin of <12 µg/L. [28]  
25  
26  
27

28 In relation to the potential determinants of ID in the current study, there was no statistically  
29 significant difference between boys and girls , this is consistent with Vendt *et al*,2007.[28] However , a  
30 study from Iran; among the 33 cases diagnosed having iron deficiency anemia, 26 children (78.8%) were  
31 males and the prevalence of iron deficiency anemia was statistically significant among boys rather than in  
32 girls ( $p = 0.015$ ).[42] One more study from Iran conducted over 201 infants and showed that the  
33 prevalence of iron deficiency anemia was 61.5% among male infants. The researchers used a multiple  
34 logistic regression model and revealed that male gender was the most important iron deficiency risk factor  
35 they could found in their study (OR = 3.3; 95% CI 1.7-6.3; and  $p < 0.001$ ).[43]  
36  
37  
38

39 The current study indicated a higher prevalence of iron deficiency among non-Qatari infants  
40 compared to their Qatari counterparts and was statistically significant. This difference could be  
41 attributed to the possible difference in economic, social and/or nutritional attributes. Iron deficiency was  
42 more common among those infants born preterm compared to the full term born infants, but it did not  
43 reach the level of statistical significance. This finding is similar to results from other studies form Canada  
44 where prematurity and intra-uterine growth retardation are risk factors for iron deficiency and iron  
45 deficiency anemia as they cause low hepatic and bone marrow iron stores at birth.[18] A clinical report  
46 from the American Academy of Pediatrics acknowledged that the deficit of total body iron in preterm  
47 infants increases with decreasing gestational age. It is worsened by the rapid postnatal growth that many  
48 infants experience and by frequent phlebotomies without adequate blood replacement; finally, all these  
49 are risk factors for iron deficiency. [3]  
50  
51  
52  
53

54 A low birth weight infant showed more possibility of having iron deficiency compared to those born  
55 with normal weight. This finding was similar to a study in Estonia where the mean birth weight among  
56 the iron deficient group was significantly lower than in the control group. [28]  
57  
58  
59  
60

1  
2  
3  
4  
5  
6  
7  
8  
9  
10  
11  
12  
13  
14  
15  
16  
17  
18  
19  
20  
21  
22  
23  
24  
25  
26  
27  
28  
29  
30  
31  
32  
33  
34  
35  
36  
37  
38  
39  
40  
41  
42  
43  
44  
45  
46  
47  
48  
49  
50  
51  
52  
53  
54  
55  
56  
57  
58  
59  
60

Regarding the infant's mode of delivery in this study, those infants born through caesarean section showed more iron deficiency rather than those born through normal delivery. This result was consistent with the result of a systematic review and meta-analysis study, which indicated that caesarean section compared with vaginal delivery is associated with a reduced placental transfusion and poor iron-related hematologic indices in both cord and peripheral blood. This in turn indicates that neonates delivered by caesarean section might be more likely to develop iron deficiency anemia later in infancy compared to their normally delivered counterparts.[30]

In the current study, iron deficiency was more common among infants born to younger mothers aged 25 years old or less (11.3%) compared to 8.1% among infants of mothers aged 26 - 35 years and 10.9% for infants of mothers aged more than 35 years. Similarly an exploratory descriptive study conducted in Egypt over 400 healthy children aged 12 to 24 month, revealed that iron deficiency was more prevalent among infants of mothers aged 20-29 years old (67.2%) compared to infants of mothers aged more than 30 years (22.4%) and to infants of mothers aged less than 20 years old (10.4%).[44] and the explanation may be related to the lack of the infant feeding experience of young mothers. Iron deficiency was more common among infants born to illiterate mothers compared to infants born to mothers with university education or above, but the relation was not statistically significant. On the same trend, the relation with parental education was also insignificant. This result is going with the findings of a study indicated a statistically significant difference found between iron deficiency anemia among children below the age of two years regarding the level of father and mother education, as the highest percentage (32.1%) of anemia cases were belonging to infants of illiterate mothers ( $X^2=21.775$  and  $p = 0.0001$ ).[44]

On the other hand, educational level of the mother did not have an effect on the iron status of her infant in a study from Iran. [42] In the current study, iron deficiency was more prevalent among infants born to housewife mothers compared to those born to working mothers, and the relation was statistically significant. This result is consistent with the results of a study conducted in Alexandria, Egypt, where 88.4% of infants born to non-working mothers had iron deficiency anemia, compared to only 15.4% of infants born to working mothers.[44] This finding could be explained by possible higher education and knowledge among working mothers compared to housewives, and thus better feeding practices and/or that working mothers rely more on bottle feeding (rich in iron) and have limited frequency and time for breastfeeding compared to their housewife counterparts.

Prevalence of iron deficiency anemia among infants belong to families having more than three children was higher compared to those infants born to families having 2-3 children and to families only having one child and this is similar to a study from Iraq where low serum iron was more prevalent among families had 4 children or more compared to families had less than 4 children.[39] However , a study conducted in Iran , 2007; there was no significant difference between iron deficiency anemia prevalence and the total number of children in the infant's family ( $P > 0.05$ ).[42]

In the current study, the relation between iron deficiency among the studied infants and (history of exclusive breastfeeding for six months, frequency of breastfeeding, continued breastfeeding at one year and intake of breast milk within 24 hours prior to the interview) were statistically significant ,in the same trend, a study from Estonia indicated that infants who were exclusively breastfed until the age of 6 months had significantly lower Hb and ferritin levels than infants who were exclusive breastfed only until

1  
2  
3 the age of 3 months.[28] A study from Iran revealed a prevalence of iron deficiency anemia of 27% in  
4 infants exclusively breastfed up to 6 months, 16.7% in infants fed with formula milk and 100% in infants  
5 fed with cow's milk ( $p=0.033$ ).[42] The figures goes with what is known about iron content in these types  
6 of milk, being highest in formula milk and poor in both breast milk and fresh cow's milk. A Canadian  
7 study indicated that prolonged exclusive breastfeeding decreases the intake of dietary iron which in turn  
8 leads to iron deficiency. This goes with the well documented fact that growing infants beyond the age of 6  
9 months cannot fully saturate their needs for iron by continuation on exclusive breast milk. [18-22] In a  
10 study conducted in South Korea on 87 healthy full-term infants, it showed that at 6 months of age; the  
11 incidences of iron deficiency and iron deficiency anemia in breast fed only were 33% and 30%,  
12 respectively, significantly higher than formula fed (8% and 5%, respectively) and breast fed with iron  
13 supplementation (7% and 5%, respectively). At 12 months of age, the incidences of iron deficiency and  
14 iron deficiency anemia in breast fed were 64% and 50%, respectively, again significantly higher than the  
15 other groups. [23] The establisher reason is the beneficiary influence of the iron fortifying formula milks  
16 on the infants' stores of iron as demonstrated in many studies. [18,45]

17  
18  
19  
20  
21  
22 In current study, iron deficiency was more prevalent among infants started solid, semi-solid or soft  
23 food at age of 6 months or later compared to whom started before the age of 6 months. This corresponds  
24 with the results of the Estonia study, where infants fed with solid food before 6 months had statistically  
25 higher Hb values than infants whom the solid food was introduced after 6 months of life (11.8 g/dl vs.  
26 11.4 g/dl) ( $P<0.05$ ).[28] Similar findings were demonstrated in many other studies.[25,45] Also in this  
27 study, iron deficiency cases were more common among infants with high consumption of food items  
28 containing iron of plant sources compared to food items containing iron of animal sources, and this  
29 relation was statistically significant. This finding supported by the results of a study conducted in Qatar,  
30 where iron deficiency was more common among pregnant women with high consumption of food items  
31 containing iron of plant sources ( $t\ test= 0.2$  and  $p= 0.834$ ) compared to food items containing iron of  
32 animal sources ( $t\ test= 1.6$  and  $p= 0.100$ ). They related the relation to the less bio-available iron in food  
33 items of plant origin compared to animal origin. [46]

34  
35  
36  
37  
38 Regarding iron supplementation, our findings are similar with previous studies, where iron deficiency  
39 was less among infants had history of iron supplementation. These infants also had higher Hb  
40 concentration and higher MCV. [3] A study conducted on 126 infants divided into 3 groups; 86 cases  
41 received iron supplementation irregularly, 27 cases regularly and 13 cases never received iron. Iron  
42 deficiency anemia in the first group was 26.7%, in the second group was 3.7% and in the third group was  
43 up to 69.2% and the difference between iron deficiency anemia and iron supplementation was statistically  
44 significant ( $p< 0.001$ ).[42] Another study reported significantly lower ferritin concentrations in 6-month-  
45 old infants who were exclusively breastfed than in infants who were breastfed and took iron  
46 supplementation. [18]

47  
48  
49  
50  
51 In this study, a significant relation found between receiving infant feeding counseling and prevalence  
52 of iron deficiency. A study from the US revealed that iron deficiency prevalence decreased among  
53 African American children aged 1-3 years old, from 16% to 6% between years 1976 and 2002. This  
54 marked decline has been attributed to implementation of the (Women, Infants and Children Program)  
55 which targeted by counseling specific groups of mothers and families, and this led to improvement in  
56 infant feeding practices to prevent iron deficiency.[44]



1  
2  
3 In the present study, iron deficiency prevalence was more common (9.9%) among infants born to  
4 mothers with history of having four pregnancies or more, compared to (8.8%) in infants born to mothers  
5 with less than four pregnancies (including miscarriage) and the difference was statistically insignificant.  
6 The relation may be attributed to the possible depletion of mother's body stores of iron, especially with  
7 multiple tightly close pregnancies, as demonstrated in different reports.[18,42] In the current study, iron  
8 deficiency prevalence was variable among different infant's BMI groups. These relations were  
9 statistically insignificant.  
10  
11

12  
13 On the other hand; a study conducted in the US indicated that overweight children (1-3 years old) had  
14 triple the odds of iron deficiency prevalence compared with normal weight or underweight children, as  
15 from the period of 1976 to 2002; iron deficiency prevalence remained consistently high for overweight  
16 children at 20% to 24%. [47] A second study from the US showed that iron deficiency prevalence was  
17 20% among those with overweight, 8% for those at risk for overweight, and 7% for normal-weight  
18 toddlers (1-3 years old).[48] The possible explanation to this contradiction with the results seen in the two  
19 US studies is that; anemia, iron deficiency and iron deficiency anemia is mostly related to the imbalance  
20 between iron needs and dietary sources of iron, rather than the relation with the caloric content of infant's  
21 nutrition. In addition to the small number of participated infants among wasted and severely wasted group  
22 in current study.  
23  
24  
25  
26

## 27 **Conclusion**

28  
29 Although iron deficiency and iron deficiency anemia among infants in the State of Qatar are less  
30 prevalent compared to several developing countries including those in the EMR, they are still relatively  
31 higher than rates seen in the developed ones. The prevalence of anemia in this study was 23.5%, of iron  
32 deficiency was 9.2% and of iron deficiency anemia was 7.8%. Iron deficiency was significantly  
33 associated with infants who were non-Qatari, had a non-employed mother, belonged to a family with low  
34 total monthly income, exclusively breastfed for 6 months, breastfed more frequently, continued  
35 breastfeeding at the age of one year, breastfed within the last 24 hours prior to the interview, never took  
36 infant formula milk, frequently consumed plant sources of dietary iron and had a mother that did not  
37 receive infant feeding counseling.  
38  
39  
40  
41

## 42 **Recommendations**

43  
44 Integration of mass iron deficiency and iron deficiency anemia screening prior to 12 months visit to  
45 allow for early intervention in addition to proper counseling regarding and breast feeding and proper  
46 weaning practice.  
47  
48

## 49 **Acknowledgments**

50  
51 We are extremely grateful to all the mothers who took part in this study, the staff of the well-baby  
52 clinics, data collectors and Dr. Rajvir Singh for his invaluable statistical assistance, support and guidance.  
53  
54  
55  
56  
57  
58  
59  
60



## Ethical approval

Appropriate approvals obtained from the Arab Board of Medical Specialization, Institutional Review Board of Hamad Medical Corporation and the Primary Health Care Corporation Research Committee.

## Funding

The funding of this study is received from the Research Center at Hamad Medical Corporation, state of Qatar.

## Patient consent

Obtained.

## Competing interest

None declared.

## Data sharing statement

No additional data are available.

## Contribution to authorship

AJZ, NAS and SAK designed the study and wrote the primary proposal. AJZ and SAK managed data collection and fieldwork. SRO and AJZ did literature review, data analysis, results interpretation and wrote the discussion. AJZ, SRO and NAS drafted and revised the manuscript. AJZ finalized and submitted the manuscript.

## References

1. Worldwide prevalence of anaemia, WHO Vitamin and Mineral Nutrition Information System, 1993–2005. WHO press 2008. Available from: <http://www.who.int/nutrition/publications/micronutrients/PHNmay2008.pdf> (accessed 20 May 2014)
2. Zetterström R, Iron deficiency and iron deficiency anaemia during infancy and childhood. *Acta Paediatr* 2004;93(4):436-9.
3. Robert D, Baker MD, Frank R, et al. Clinical Report: Diagnosis and Prevention of Iron Deficiency and Iron-Deficiency Anemia in Infants and Young Children (0 –3 Years of Age). *AAP* 2010;126:1040-50.
4. Halterman JS, Kaczorowski JM, Aligne CA, et al. Iron deficiency and cognitive achievement among school-aged children and adolescents in the United States. *Pediatrics* 2001;107:138-386.
5. Szajewska H, Rusczyński M, Chmielewska A. Effects of iron supplementation in non-anemic pregnant women, infants, and young children on the mental performance and psychomotor development of children: a systematic review of randomized controlled trials. *Am J Clin Nutr* 2010;91:1684-90.
6. Anaemia. WHO. 2013. [www.who.int/topics/anaemia/en/](http://www.who.int/topics/anaemia/en/) (accessed 22 May 2014)

- 1
  - 2
  - 3
  - 4
  - 5
  - 6
  - 7
  - 8
  - 9
  - 10
  - 11
  - 12
  - 13
  - 14
  - 15
  - 16
  - 17
  - 18
  - 19
  - 20
  - 21
  - 22
  - 23
  - 24
  - 25
  - 26
  - 27
  - 28
  - 29
  - 30
  - 31
  - 32
  - 33
  - 34
  - 35
  - 36
  - 37
  - 38
  - 39
  - 40
  - 41
  - 42
  - 43
  - 44
  - 45
  - 46
  - 47
  - 48
  - 49
  - 50
  - 51
  - 52
  - 53
  - 54
  - 55
  - 56
  - 57
  - 58
  - 59
  - 60
7. Micronutrient deficiencies. WHO. 2013. [www.who.int/nutrition/topics/ida/en/index.html](http://www.who.int/nutrition/topics/ida/en/index.html) (accessed 18 Jun 2014)
8. World Health Organization. Malnutrition: the global picture. Geneva: The Organization; 2000.
9. Yip R. The challenge of improving iron nutrition: limitations and potentials of major intervention approaches. *Eur J Clin Nutr* 1997;51:516-24.
10. Lawson MS, Thomas M, Hardiman A. Iron status of Asian children aged 2 years living in England. *Arch Dis Child* 1998;78:420-26.
11. Karr MA, Mira M, Alperstein G, Labib S, Webster BH, Lammi AT et al. Iron deficiency in Australian-born children of Arabic background in central Sydney. *Med J Aust* 2001;174:165-8.
12. Booth IW, Aukett MA. Iron deficiency anaemia in infancy and early childhood. *Arch Dis Child* 1997;76:549-54.
13. Anemia prevention and control. WHO; 2013. Available from: [http://www.who.int/medical\\_devices/initiatives/anaemia\\_control/en/index.html](http://www.who.int/medical_devices/initiatives/anaemia_control/en/index.html) (accessed 26 May 2014)
14. Stoltzfus RJ. Iron deficiency: global prevalence and consequences. *Food Nutr Bull* 2003 Dec;24(4):S99-103.
15. Mirmiran P, Golzarand M, Serra-Majem L, et al. Iron, Iodine and Vitamin A in the Middle East; A Systematic Review of Deficiency and Food Fortification. *Iranian J Publ Health*. 2012;41(8):8-19.
16. Anaemia. WHO; 2013. [www.emro.who.int/healthtopics/anaemia/index.html](http://www.emro.who.int/healthtopics/anaemia/index.html) (accessed Jun 2014)
17. Dallman PR. Changing iron needs from birth through adolescence. 39. Dallman PR. Changing iron needs from birth through adolescence. In: Fomon SJ, Zlotkin SH, editors. Nutritional anemias. Nestle Nutrition Workshop Series. New York: *Vevey/Raven Press*; 1992:29-38. [www.nestlenutrition-institute.org/docs/default-source/global-document-library/publications/secured/7fe7d3964ce56230a9d3622ffb3a44a5.pdf?sfvrsn=0](http://www.nestlenutrition-institute.org/docs/default-source/global-document-library/publications/secured/7fe7d3964ce56230a9d3622ffb3a44a5.pdf?sfvrsn=0) (accessed 12 Jun 2014)
18. Zlotkin S. Clinical nutrition: 8. The role of nutrition in the prevention of iron deficiency anemia in infants, children and adolescents. *CMAJ*. 2003;168(1):59-63.
19. Dallman PR. Nutritional anemias in childhood: iron, folate and vitamin B12. In: Suskind RM, LewinterSuskind L, eds. Textbook of Pediatric Nutrition. 2nd ed. New York: *Raven Press*; 1993:91-105.
20. Aggett, P. Iron for the suckling. Iron nutrition in childhood. *Acta Paediatr Scand* 1989;78(361):96-102.
21. Kim HJ, Kim DH, Lee EJ, et al. Is It Possible to Predict the Iron Status from an Infant's Diet History?. *Pediatr Gastroenterol Hepatol Nutr* 2013;16(2):95-103.
22. Infant young child feeding counselling: An integrated course. Geneva, Switzerland. WHO. 2006. [whqlibdoc.who.int/publications/2006/9789241594769\\_eng.pdf](http://whqlibdoc.who.int/publications/2006/9789241594769_eng.pdf) (accessed 16 Oct 2014)
23. Noh SJ, Na B, Kim MJ. Iron deficiency and early, low-dose iron supplementation in breastfed infants. *Korean J Pediatr Gastroenterol Nutr* 2008 Sep;11(2):169-78.
24. Male C, Persson LA, Freeman V, et al. Prevalence of iron deficiency in 12-mo-old infants from 11 European areas and influence of dietary factors on iron status (Euro-Growth study). *Acta Paediatr* 2001 May;90(5):492-8.
25. Chang JH, Cheong WS, Jun YH, et al. Weaning food practice in children with iron deficiency anemia. *Korean J Pediatr* 2009 Feb;52(2):159-66.
26. Global Strategy for Infant and Young Child Feeding, 2013. WHO. [www.who.int/nutrition/topics/global\\_strategy/en/index.html](http://www.who.int/nutrition/topics/global_strategy/en/index.html) (accessed 16 Oct 2014)
27. Infant and young children feeding, a tool for assessing national practices, policies and programmes. WHO publications. [http://www.who.int/nutrition/publications/inf\\_assess\\_nnpp\\_ref\\_eng.pdf](http://www.who.int/nutrition/publications/inf_assess_nnpp_ref_eng.pdf)
28. Vendt N, Grünberg H, Leedo S, et al. Prevalence and causes of iron deficiency anemias in infants aged 9 to 12 months in Estonia. *NCBI* 2007;43(12):947-52.

29. Miller CJ, Dunn EV, Abdouni SF, et al. Factors associated with iron depletion and iron deficiency anemia among Arabic preschool children of the United Arab Emirates. *Saudi Med J* 2004 Jul;25(7):843-7.
30. Zhou YB, Li HT, Zhu LP, Liu JM. Impact of cesarean section on placental transfusion and iron-related hematological indices in term neonates: a systematic review and meta-analysis. *Epub* 2014;35(1):1-8.
31. Eden AN, Sandoval C. Iron deficiency in infants and toddlers in the United States. *PediatrHematolOncol* 2012;29:704-9.
32. Altuntas N, Beken S, Kulali F, et al. Prevalence of iron deficiency at the first age of the infants hospitalized in neonatal period. *TransfusApherSci* 2012;47:85-9.
33. Iron Deficiency Anaemia Assessment, Prevention and Control: A guide for programme manager. *WHO press* 2001; WHO/NHD/01.3.  
[www.who.int/nutrition/publications/micronutrients/anaemia\\_iron\\_deficiency/WHO\\_NHD\\_01.3/en/](http://www.who.int/nutrition/publications/micronutrients/anaemia_iron_deficiency/WHO_NHD_01.3/en/) (accessed 16 Oct 2014)
34. PHCC. Well baby clinic protocol. Doha, Qatar: *PHCC*; 2011.
35. Stevens GA, Finucane MM, De-Regil LM, et al. Global, regional, and national trends in haemoglobin concentration and prevalence of total and severe anaemia in children and pregnant and non-pregnant women for 1995–2011: a systematic analysis of population-representative data. *Lancet Glob Health* 2013 Jul;1(1):e16-e25.
36. Bagchi K. Nutrition in the Eastern Mediterranean Region of the World Health Organization. *EMHJ* 2008;14:S107-S113.
37. Babiker MA, Bahakim HM, al-Omair AO, et al. Prevalence of iron deficiency in Saudi children from birth to 15 months of age. *Ann Trop Paediatr* 1989;9:111-4.
38. Assiri F, Al-Sumaie M, Safar F, et al. Prevalence and associated factors of iron deficiency anemia among Kuwaiti children. *Bull Alex Fac Med* 2006;42(2).
39. Alkhateeb N. Risk factors associated with iron deficiency among children admitted to paediatric emergency unit in Erbil, Iraq. *Zanco J Med Sci* 2010;14(3):1-8.
40. Elalfy MS, Hamdy AM, Maksoud SS, et al. Pattern of milk feeding and family size as risk factors for iron deficiency anemia among poor Egyptian infants 6 to 24 months old. *Nutr Res* 2012;32(2):93-9.
41. Mahmoud H, Muddathir A, Osman S, et al. Iron deficiency anemia among children under three years in Kassala, Eastern Sudan. *Sudanese journal of public health* 2014;9:33-7.
42. Monajemzadeh SM, Zarkesh MR. Iron deficiency anemia in infants aged 12-15 months in Ahwaz, Iran. *Indian J PatholMicrobiol* 2009;52:182-4.
43. Antunes H, Santos C, Carvalho S, et al. male gender is an important clinical risk factor for iron deficiency in healthy infants. *Clinical Nutrition ESPEN* 2012;7(6):e219-e222.
44. Mohamed A, abo-donia A. Contributing factors of iron deficiency anemia among children under two years attending family health centers in Alexandria. *Life Science Journal* 2011;8(4):996-1007.
45. Shaw V, McCrann U. Infant feeding: weaning. London, UK: Great Ormond Street Hospital; 2012.  
[www.gosh.nhs.uk/health-professionals/clinicalguidelines/infant-feeding-eaning/#Rationale](http://www.gosh.nhs.uk/health-professionals/clinicalguidelines/infant-feeding-eaning/#Rationale) (accessed 17 Oct 2014)
46. Al-Mass M, Horeesh NA, Al-Kuwari M. Anemia and Iron Deficiency: Prevalence and determinants among Pregnant Women Attending Primary Health Care Centers, State of Qatar, 2010 [Arab Board of Medical Specialization thesis]. Doha, Qatar: Hamad Medical Corporation; 2010.
47. Brotanek JM, Gosz J, Weitzman M, et al. Secular trends in the prevalence of iron deficiency among US toddlers, 1976-2002. *Arch PediatrAdolesc Med* 2008 Apr;162(4):374-81.
48. Brotanek JM, Gosz J, Weitzman M, Flores G. Iron deficiency in early childhood in the United States: risk factors and racial/ethnic disparities. *Pediatrics* 2007 Sep;120(3):568-75.

# BMJ Open

## Iron deficiency, its epidemiological features and feeding practices among infants aged 12 months in Qatar, a cross-sectional study

|                                 |                                                                                                                                                                                                                                                                                                                                                                                                                                        |
|---------------------------------|----------------------------------------------------------------------------------------------------------------------------------------------------------------------------------------------------------------------------------------------------------------------------------------------------------------------------------------------------------------------------------------------------------------------------------------|
| Journal:                        | <i>BMJ Open</i>                                                                                                                                                                                                                                                                                                                                                                                                                        |
| Manuscript ID                   | bmjopen-2017-020271.R1                                                                                                                                                                                                                                                                                                                                                                                                                 |
| Article Type:                   | Research                                                                                                                                                                                                                                                                                                                                                                                                                               |
| Date Submitted by the Author:   | 15-Dec-2017                                                                                                                                                                                                                                                                                                                                                                                                                            |
| Complete List of Authors:       | Zainel, A.Jaleel; Primary Health Care Corporation, Clinical Affairs<br>Osman, Sherif ; Alexandria University High Institute of Public Health;<br>Primary Health Care Corporation, Family and Community Medicine<br>Al-Kohji, Sadriya; Primary Health Care Corporation, Service Development<br>Selim, Nagah; Cairo University, Public Health and Preventive Medicine;<br>Primary Health Care Corporation, Family and Community Medicine |
| <b>Primary Subject Heading</b>: | Epidemiology                                                                                                                                                                                                                                                                                                                                                                                                                           |
| Secondary Subject Heading:      | Public health                                                                                                                                                                                                                                                                                                                                                                                                                          |
| Keywords:                       | iron deficiency, feeding, infants, Qatar                                                                                                                                                                                                                                                                                                                                                                                               |
|                                 |                                                                                                                                                                                                                                                                                                                                                                                                                                        |

SCHOLARONE™  
Manuscripts

1  
2  
3 **Iron deficiency, its epidemiological features and feeding practices among infants aged 12**  
4 **months in Qatar, a cross-sectional study**  
5  
6  
7

8 **Corresponding author and PI:**  
9

10 **Dr. Abdul Jaleel Zainel** MBBch, ABCM

11 Community Medicine Specialist, Primary Health Care Corporation, Doha, Qatar

12 E-mail: azainel@phcc.gov.qa

13 P.O. Box 55772, Doha, Qatar

14 Cell phone: + (974) 55087676

15  
16  
17  
18  
19 **CO-PIs:**  
20

21 **Dr. Sherif R. Omar** MBBch, DPH, DM, FRCP, DTM&H, DrPH

22 Associate Professor of Public and Tropical Health, High Institute of Public Health, University of  
23 Alexandria, Egypt / Community Medicine Consultant, Primary Health Care Corporation, Doha, Qatar

24 E-mail: shosman@phcc.gov.qa / sherif\_omar67@yahoo.com

25 Office phone: + (974) 4407 0371, Cell phone: + (974) 33751401

26  
27  
28  
29  
30 **Dr. Sadriya Al Kohji** MBBch, ABCM

31 Community Medicine Consultant, Primary Health Care Corporation, Doha, Qatar

32 E-mail: salkohji@phcc.gov.qa

33 Cell phone: + (974) 55812292

34  
35  
36  
37 **Dr. Nagah A. Selim** MBBch, MPH, PhD

38 A / Professor of Public Health and Preventive Medicine, Cairo University, Egypt / Associate Program  
39 Director, Community Medicine Residency Program, Primary Health Care Corporation, Doha, Qatar

40 E-mail: nselim@phcc.gov.qa

41 Office phone: + (974) 4407 0341, Cell phone: + (974) 66083921

42  
43  
44  
45  
46  
47 **WORD COUNT**

48 4878 words  
49  
50  
51  
52  
53  
54  
55  
56  
57  
58  
59  
60

## Abstract

**Objectives** To estimate the magnitude of anemia, iron deficiency (ID), iron deficiency anemia (IDA) and to explore epidemiological features of ID and feeding practices among infants aged 12 months in Qatar.

**Setting** Well baby clinics in 14 randomly selected primary health care centers covering all geographical areas on the national level.

**Participants** Three hundred and six (163 male and 143 female) infants of all nationalities were enrolled. Mothers were asked to complete a pre-designed interview questionnaire and infants were blood tested for anemia, ID and IDA.

**Outcome measures** Cutoff point used to diagnose anemia was Hb <11.1 g/dl, and to diagnose ID, serum ferritin (SF) <6 ug/l with normal C-reactive protein.

**Results** Prevalence of anemia was 23.5%, ID was 9.2% and IDA was 7.8%. ID was more prevalent among non-Qatari infants compared to Qatari (10.9% vs. 1.7%,  $p=0.029$ ), more prevalent among infants born to housewives and to families of low income ( $p \leq 0.05$ ). In regard to feeding practice; ID was higher in infants who continued breastfeeding till the age of one year and among those never took infant formula milk ( $p \leq 0.05$ ). Mothers received infant feeding counseling had less ID occurrence among their infants compared to their counterparts who did not receive such counseling (4.2% vs. 13.4%,  $p=0.005$ ).

**Conclusion:** Although ID and IDA among infants in Qatar are less prevalent compared with many developing countries, still further efforts should be spent to be compared with the developed. Efforts should target the revealed epidemiological features with special emphasis on infant feeding and infant feeding counselling to mothers.

**Key words:** Iron, Anemia, Prevalence, feeding, 12 months infants, Qatar

### Strengths and limitations of this Study

- The first population-based study about ID and IDA among infants in Qatar.
- Covering a critical age of infancy (12 months) where feeding and weaning practices can influence the health and wellbeing of the child.
- Being a cross-sectional study where temporality cannot be demonstrated.
- A prospective study design would have overcome potential recall bias; however, it was not feasible to undertake one at the time due to shortage of resources.
- Difference in the applied diagnostic criteria and laboratory cutoff values in identification of anemia, ID and IDA across different studies; limits the ability of a precise comparison.

### Introduction

Newborns, infants and young children are vulnerable to anemia especially iron deficiency anemia (IDA), which represents a public health problem with defined impacts on the health of communities.[1] Published evidence suggests that early infant feeding practices play a major role in the prevalence of iron deficiency (ID) and IDA.[2,3] Anemia early in life, with or without iron depletion, is known to seriously affect children's general health and immunity, retarding their growth and development by causing multiple disorders and abnormalities in different body systems.[3-5]

Anemia is a condition in which the number of red blood cells or their oxygen-carrying capacity decreased until insufficient level to meet physiologic needs, which vary by age, sex and altitude. In



1  
2  
3 different words anemia is a hemoglobin (Hb) concentration 2 standard deviation (SD) below the mean Hb  
4 concentration for a normal population of the same gender and age range.[3,6]IDA is a preventable and a  
5 treatable condition, therefore, early diagnosis represents the cornerstone in protection from its adverse  
6 consequences, together with combat of its contributing factors.  
7

8  
9 Globally, ID is the most common and widespread nutritional disorder. It can affect all age groups  
10 particularly children in the developing countries where its prevalence can be up to 50% among infants  
11 aged 12 months in some countries. It is the only nutrient deficiency which is also significantly prevalent  
12 in developed countries. IDA is a leading cause of mortality and morbidity among infants worldwide, with  
13 some of its manifestations possibly irreversible.[7-14] In a systematic review done in 2012 to evaluate  
14 micronutrient deficiencies and food fortification in the Middle East, ID represented one of the three  
15 commonest micronutrients deficiencies in the region in addition to iodine and vitamin A.[15] According  
16 to the World Health Organization (WHO) in 2013; 63% of children under-5 in the Eastern Mediterranean  
17 Region had IDA. In some studies; anaemia among preschool children showed similar high rates.[16]  
18  
19

20  
21 In terms of sources and bioavailability of iron, its transfer from the mother to fetus occurs mainly  
22 during the third trimester of pregnancy and is stored mainly in the liver and bone marrow. Thus, the  
23 amount of iron present at birth depends on the gestational age and the weight of the baby.[17] Full term  
24 infants usually have sufficient iron stores until 4 to 6 months of age. During the first months of life,  
25 human milk (which contains 0.2–0.3 mg/L of iron) does not provide enough iron to meet the demands of  
26 the rapid growth and erythropoiesis; therefore, iron stores are mobilized to meet the iron requirements of  
27 the infant mostly around the age of 4-6 months. This results in iron stores being generally depleted by the  
28 age of 6 months, yet from 4 to 12 months after birth the infant's blood volume doubles. Thus, at this age,  
29 dietary sources of iron become critical to keep up with this rapid rate of growth and red blood cells  
30 synthesis.[18-22]  
31  
32

33  
34 Studies have shown that children below two years have increased nutritional requirements because  
35 of their growth spurt, which often leads to a negative nutrient balance.[2] In general, prolonged  
36 exclusive breastfeeding (more than 6 months) causes decrease in dietary iron intake and may lead to iron  
37 depletion.[18,23] Male *et al.* in 2001 indicated that feeding with iron-fortified formula was the main  
38 factor positively influencing iron status among infants up to the age of 12 months, as well as, positive  
39 association with consumption of cereals and iron supplements.[24] Inadequate complementary feeding  
40 practices represent an important risk factor for IDA. These are characterized by consumption of foods  
41 with low amounts of bio-available iron or foods with inhibitors to iron absorption, and these practices  
42 often extend up to the age of 2years.[18,25]  
43  
44

45  
46 Infant feeding counseling offered to mothers and other caregivers on how to gradually increase  
47 consistency and quantity of foods assists in prevention of micronutrient deficiency.[26,27] Preterm  
48 babies, as well as, those born small for gestational age, are particularly vulnerable to ID in their first  
49 months of life.[2,28,29] Infants delivered by cesarean section are more likely to get ID, as their delivery  
50 is associated with reduced placental transfusion and poor iron-related hematologic indices in both cord  
51 and peripheral blood.[30]  
52

53  
54 Prevention and control strategies against IDA are mainly depend on the time of diagnosis and start of  
55 treatment.[7] The WHO has developed a “Global Strategy for Infant and Young Child Feeding” in order  
56 to prevent the development of micronutrient deficiencies including ID and IDA.[26] Many studies  
57  
58  
59



1  
2  
3 indicated that incidence of IDA has significantly decreased over time due to promotion of breastfeeding,  
4 improvement of overall nutritional status and use of iron-fortified baby foods.[31,32]  
5

6 Qatar is a small Arab league state, located on the northeastern coast of the Arabian Peninsula, with oil  
7 and gas as the main source of wealth, making a country with the highest per capita income in the world.  
8 Up to 80 % of its population consists of foreign expatriates and their families. The Primary Health Care  
9 Corporation (PHCC) is the nation's main provider of primary services with 23 health centers currently  
10 operating across Qatar. Well Baby Clinic (WBC) services provided at the health centers include routine  
11 screening of infants for anemia during their MMR vaccination visit at 12 months of age, however, routine  
12 screening for ID or IDA is not undertaken.[8] Previous studies in Qatar have focused on the extent of  
13 anemia but not specifically on ID or IDA in this age group. This study investigates the prevalence of ID  
14 and IDA and the correlates of ID among infants at 12 months of age, as well as, their feeding practices  
15 retrieved from mothers of all nationalities residing in the state. Based on the 12 months vaccination  
16 coverage rates calculated by the PHCC in Qatar and confirmed by its head of child health section,  
17 vaccination coverage rates is over 97% at this age, therefore participants recruited are considered a  
18 representative sample of the national population. The service is completely free of charge to all  
19 nationalities. The current study provides a much needed first snapshot of the extend of problem in the  
20 State of Qatar.  
21  
22  
23  
24

## 25 **Methods**

26  
27 A cross sectional study was conducted at WBCs in PHCC centers. These clinics provide  
28 comprehensive evidence-based services to all children under the age of 5 years. Of the 21 PHCC centers  
29 across Qatar operating at time of the study, 14 were providing the WBC service. Infants in the WBC  
30 appointment system who attended the selected centers seeking WBC services for the 12 month visit and  
31 met the eligibility were included in the study sample. Mothers of all participating infants signed an  
32 informed consent form.  
33  
34

35 **Eligibility criteria:** Male and female infants completed 12 months of age (but less than 13 months) and  
36 of all nationalities (Qatari and non-Qatari) attending WBCs at their routine 12 month's visit were eligible.  
37 Participants diagnosed with sickle cell anemia or thalassemia were excluded.  
38  
39

40 **Sample size calculation and sampling technique:** As ID prevalence in Qatar was not available; the  
41 latest published prevalence of ID in the nearest regional country (The United Arab Emirates) of 26 % was  
42 used to calculate the sample size.[29] It was estimated that a sample size of 292 is required for the study.  
43 To compensate for possible non-responders, an additional 20% were added bringing a total of 350 after  
44 rounding. A 95% confidence level and 5% error rate were used for the calculation. A systematic random  
45 sampling technique was used to recruit study participants. The sampling frame utilized the daily  
46 appointment list in WBCs, where the first participant of the day was selected randomly from the list and  
47 the following candidates were recruited systematically. The study took place in the period between  
48 September 2014 and May 2015.  
49  
50  
51

52 **Study variables:** The study included dependent and independent variables. Dependent included 'Iron  
53 deficiency (ID), defined as Serum Ferritin (SF) below normal reference range (6-24 ug/L) in absence of  
54 high C-Reactive Protein (CRP).[3,33], and 'Iron deficiency anemia (IDA)' defined by combination of  
55 three elements - Hb <11.1 g/dl (normal reference range is 11.1-14.1 g/dl), low SF (<6 mcg/L) and absence  
56  
57  
58  
59

of high CRP (reference level is normally less than 5 mg/L).[3,6,33,34]Independent variables included socio-demographic characteristics of infants and their parents, birth history of the participant, history of maternal pregnancies, breastfeeding, intake of infant formula milk, frequency of consumption of different food groups, iron supplementation, infant feeding counseling to mothers, as well as, body mass index (BMI) calculation.

**Data collection tools:** The research team developed an interview-administered questionnaire after extensive literature review to establish content and face validity, followed by thorough discussion and assessment by experts in the fields of pediatric hematology and community medicine. A pilot was undertaken over 20 participants, conveniently sampled, to establish and confirm its suitability. Necessary adjustments were made accordingly. Anthropometric measurements of participants were acquired in order to calculate BMI. Laboratory results of participants were retrieved from their electronic medical record using a data extraction sheet. Venous blood samples are collected routinely by well baby clinics for all 12 months aged infants as per their protocol to check for anemia. Additional laboratory studies for ID detection utilizing these samples were managed in hematology laboratory of the Qatar's secondary health care provider; Hamad Medical Corporation (HMC).

**Data analysis:** Statistical Package for Social Sciences IBM-SPSS<sup>®</sup> version 20 was used for data entry and analysis. Descriptive analysis was undertaken (*frequency distribution tables, proportions, mean and standard deviation*), in addition to analytical statistics (*Chi-square test and fisher exact probability test*) were used to assess differences between two or more proportions and the *Student t test* was used to compare continuous variables. An *Alpha (p)* value of  $\leq 0.05$  was used as the cut-off level of significance.

**Quality control measures:** The questionnaire was pre-tested using a convenient sample of 20 infants. Their data was omitted prior to analysis. Content and face validity were established using extensive literature review and consultation with academic experts in community medicine and experts in the fields of hematology and pediatrics. The main researchers did all data entry and review. Standardized methods of blood collection and automated measures for blood analysis were used to ensure reliability of the study results.

**Ethical considerations:** Ethical approvals were obtained prior to fieldwork from PHCC and HMC ethical review boards. Permission was also obtained from PHCC center directors, as well as, mothers of infants identified for the study. Privacy and confidentiality of participant's data was assured. Mothers were invited to participate voluntarily and allowed to withdraw at any time during the study.

## Results

Of the calculated and approached 350 participants identified for the study, laboratory data was available for 306 of them giving a response rate of 87.4%, but still over the figure required by calculation (i.e. 292). **Figure (1)** demonstrates the prevalence of the dependent variables.

As shown in **Table (1)**, when the relation between ID and background characteristics of the infants were assessed, it was found that ID is more common in males. However the relationship was not

statistically significant. The study found a statistically significant higher prevalence of ID among Non-Qatari infants compared to their Qatari counterparts.

**Table (1): Relation between ID and infants' background characteristics**

| Characteristic                         | No ID (%)  | ID (%)    | Total | $\chi^2$ | <i>p</i> value |
|----------------------------------------|------------|-----------|-------|----------|----------------|
| <b>Gender</b>                          |            |           |       |          |                |
| Male                                   | 146 (89.6) | 17 (10.4) | 163   | 0.686    | 0.265          |
| Female                                 | 132 (92.3) | 11 (7.7)  | 143   |          |                |
| <b>Nationality</b>                     |            |           |       |          |                |
| Qatari                                 | 57 (98.3)  | 1 (1.7)   | 58    | 4.748    | <b>0.029</b>   |
| Non Qatari                             | 221 (89.1) | 27 (10.9) | 248   |          |                |
| <b>Gestational age</b>                 |            |           |       |          |                |
| Pre-term (< 37 weeks)                  | 23 (88.5)  | 3 (11.5)  | 26    | 0.195    | 0.433          |
| Full-term ( $\geq$ 37 weeks)           | 255 (91.1) | 25 (8.9)  | 280   |          |                |
| <b>Birth weight</b>                    |            |           |       |          |                |
| Low (< 2500 grams)                     | 18 (90)    | 2 (10.0)  | 20    | 0.019    | 0.565          |
| Normal ( $\geq$ 2500 grams)            | 260 (90.9) | 26 (9.1)  | 286   |          |                |
| <b>Mode of child delivery</b>          |            |           |       |          |                |
| Normal                                 | 183 (91.5) | 17 (8.5)  | 200   | 0.294    | 0.364          |
| Caesarean section                      | 95 (89.6)  | 11 (10.4) | 106   |          |                |
| <b>Twins, triple or multiple birth</b> |            |           |       |          |                |
| No                                     | 270 (90.6) | 28 (9.4)  | 298   | 0.827    | 0.460          |
| Yes, twins                             | 8 (100)    | 0 (0)     | 8     |          |                |

In terms of background characteristics of parents, the relation of ID with mother's employment status and the family income were found to be statistically significant, as shown in **Table (2)**.

**Table (2): Relation between ID and infants' parents background characteristics**

| Characteristic                                              | No ID (%)  | ID (%)    | Total | $\chi^2$ | <i>p</i> value                |
|-------------------------------------------------------------|------------|-----------|-------|----------|-------------------------------|
| <b>Mother's age</b>                                         |            |           |       |          |                               |
| $\leq$ 25 years                                             | 55 (88.7)  | 7 (11.3)  | 62    | 0.778    | 0.678                         |
| 26 – 35 years                                               | 182 (91.9) | 16 (8.1)  | 198   |          |                               |
| More than 35 years                                          | 41 (89.1)  | 5 (10.9)  | 46    |          |                               |
| <b>Number of mother's pregnancy (including miscarriage)</b> |            |           |       |          |                               |
| < 4                                                         | 187 (91.2) | 18 (8.8)  | 205   | 0.102    | 0.749                         |
| > 4                                                         | 91 (90.1)  | 10 (9.9)  | 101   |          |                               |
| <b>Mother's education level</b>                             |            |           |       |          |                               |
| Illiterate                                                  | 6 (75.0)   | 2 (25.0)  | 8     | 3.598    | 0.165                         |
| Up to secondary school                                      | 91 (93.8)  | 6 (6.2)   | 97    |          |                               |
| University educated and above                               | 181 (90.0) | 20 (10.0) | 201   |          |                               |
| <b>Father's education level</b>                             |            |           |       |          |                               |
| Up to secondary school                                      | 93 (93.0)  | 7 (7.0)   | 100   | 0.826    | 0.246                         |
| University educated and above                               | 185 (89.8) | 21 (10.2) | 206   |          |                               |
| <b>Mother's employment status</b>                           |            |           |       |          |                               |
| Housewife                                                   | 186 (87.3) | 27 (12.7) | 213   | 10.480   | <b><math>\leq</math> 0.05</b> |
| Working job                                                 | 92 (98.9)  | 1 (1.1)   | 93    |          |                               |

|                                               |            |           |     |        |        |
|-----------------------------------------------|------------|-----------|-----|--------|--------|
| <b>Father's occupation</b>                    |            |           |     |        |        |
| Manual worker                                 | 31 (91.2)  | 3 (8.8)   | 34  |        |        |
| Clerk/administrative                          | 85 (87.6)  | 12 (12.4) | 97  | 1.904  | 0.593  |
| Professional                                  | 118 (92.9) | 9 (7.1)   | 127 |        |        |
| Others                                        | 44 (91.7)  | 4 (8.3)   | 48  |        |        |
| <b>Total number of children in the family</b> |            |           |     |        |        |
| 1                                             | 81 (94.2)  | 5 (5.8)   | 86  |        |        |
| 2-3                                           | 134 (90.5) | 14 (9.5)  | 148 | 2.140  | 0.343  |
| More than 3                                   | 63 (87.5)  | 9 (12.5)  | 72  |        |        |
| <b>Family income in Qatari Riyals (QR)</b>    |            |           |     |        |        |
| Up to 10000 QR                                | 107 (82.9) | 22 (17.1) | 129 |        |        |
| 10001-20000 QR                                | 99 (95.2)  | 5 (4.8)   | 104 | 17.369 | ≤ 0.05 |
| More than 20000 QR                            | 72 (98.6)  | 1 (1.4)   | 73  |        |        |

Table (3) shows several statistically significant relations between ID in infants and their feeding practice and iron supplementation.

Table (3): Relation between ID and feeding practice

| Characteristic                                                           | No ID (%)  | ID (%)    | Total | $\chi^2$ | p value |
|--------------------------------------------------------------------------|------------|-----------|-------|----------|---------|
| <b>Exclusive breastfeeding for 6 months</b>                              |            |           |       |          |         |
| Yes                                                                      | 51 (81.0)  | 12 (19.0) | 63    | 7.915    | 0.007   |
| No                                                                       | 208 (92.9) | 16 (7.1)  | 224   |          |         |
| <b>Frequency of breastfeeding</b>                                        |            |           |       |          |         |
| All or almost all feeds                                                  | 142 (86.1) | 23 (13.9) | 165   | 8.893    | 0.012   |
| About half of all feeds                                                  | 76 (93.8)  | 5 (6.2)   | 81    |          |         |
| Few feeds since was born                                                 | 41 (100.0) | 0 (0)     | 41    |          |         |
| <b>Continuation of breastfeeding at one year</b>                         |            |           |       |          |         |
| Yes                                                                      | 115 (82.7) | 24 (17.3) | 139   | 17.268   | ≤ 0.05  |
| No                                                                       | 144 (97.3) | 4 (2.7)   | 148   |          |         |
| <b>Breastfeeding intake within the last 24 hours</b>                     |            |           |       |          |         |
| Yes                                                                      | 112 (82.4) | 24 (17.6) | 136   | 18.281   | ≤ 0.05  |
| No                                                                       | 147 (97.4) | 4 (2.6)   | 151   |          |         |
| <b>Ever take infant formula milk (n= 306)</b>                            |            |           |       |          |         |
| Yes                                                                      | 225 (95.3) | 11 (4.7)  | 236   | 25.011   | ≤ 0.05  |
| Never                                                                    | 53 (75.7)  | 17 (24.3) | 70    |          |         |
| <b>Age at introducing of any solid, semi-solid or soft food (n= 306)</b> |            |           |       |          |         |
| Less than 6 months                                                       | 72 (91.1)  | 7 (8.9)   | 79    | 0.011    | 0.917   |
| 6 months or more                                                         | 206 (90.7) | 21 (9.3)  | 227   |          |         |
| <b>Ever take iron supplementation (n= 306)</b>                           |            |           |       |          |         |
| Yes                                                                      | 27 (96.4)  | 1 (3.6)   | 28    | 1.154    | 0.283   |
| No                                                                       | 251 (90.3) | 27 (9.7)  | 278   |          |         |

The differences in mean frequency of consumption for different groups of food is shown in **Table (4)**, where infants diagnosed with ID consumed less plants rich in iron, and the difference was statistically significant. However, the difference was not significant for animal sources of iron and the overall score of food frequency.

**Table (4): Relation between ID and food frequency score**

| Food item             | Mean $\pm$ SD  |                 | Student's <i>t</i> test | <i>p</i> value |
|-----------------------|----------------|-----------------|-------------------------|----------------|
|                       | No ID          | ID              |                         |                |
| Overall score         | 21.2 $\pm$ 3.9 | 19.89 $\pm$ 4.0 | 1.64                    | 0.12           |
| Animal Source of iron | 7.9 $\pm$ 2.3  | 7.9 $\pm$ 2.2   | 0.02                    | 0.98           |
| Plant source of iron  | 13.2 $\pm$ 2.8 | 11.9 $\pm$ 2.7  | 2.26                    | <b>0.03</b>    |

When the relation between ID and infant feeding counseling for mothers was assessed, it found that there is a significant relationship between receiving counseling and ID occurrence, as the prevalence of ID was higher among infants to mothers didn't receive feeding counseling compared to infants of mothers received such counseling (13.4 against 4.2%) respectively, with ( $\chi^2= 7.731$  and  $p= 0.005$ ).

According to the BMI for age based on z-score, ID prevalence was variable among different BMI groups. [35,36] It was as high as (16.7%) among wasted/severely wasted infants, (9.7%) among infants at risk of overweight, (9.4%) among infants with normal BMI and as low as (5.6%) among the overweight/obese group of infants. These relationships were not statistically significant ( $\chi^2= 1.007$  and  $p= 0.799$ ).

## Discussion

This is the first population-based descriptive epidemiological study to estimate the prevalence and associated factors of ID and IDA in infants in Qatar. This study found the prevalence of anemia, iron deficiency and iron deficiency anemia among infants was 23.5%, 9.2% and 7.8% respectively, which is much lower than the published global prevalence. [37]

Comparing the prevalence rate of anemia from this study with the figures published for other countries of the Eastern Mediterranean Region (EMR) shows that many of them have an even higher burden of disease. The WHO report, 2013 showed also no improvement in the overall anaemia situation among the pre-schooler where 63% of children under the age of 5 years had iron deficiency anaemia. [16, 38]

The prevalence of anemia, ID and IDA in our study was also lower than in the United Arab Emirates, Kuwait and Saudi Arabia [29, 39, 40]. A study conducted in Raparin teaching hospital for children in

1  
2  
3 Erbil - Iraq, 2007, among infants aged (12 - 24) months, showed that the prevalence of iron deficiency  
4 ranged between 51.9% and 48.1%. It also showed that about 53% and 30 % of participants had anemia  
5 and iron deficiency anemia respectively. [41]  
6

7 In addition, Qatar has implemented a well-developed and comprehensive well baby program at  
8 primary health care centers. In a study undertaken in 2011 at Ain Shams University Children's Hospital  
9 (Egypt) which included three hundred poor Egyptian infants, anemia was diagnosed in 66% of the  
10 participants aged between 6 and 24 months, and among them, 43% had iron deficiency anemia [42]. This  
11 high prevalence rate may be referred to the selection of a high-risk group for the study. Similar results  
12 were also seen in Kassala (Eastern Sudan) where up to 86% of young children less than three years of age  
13 living were diagnosed with iron deficiency anemia.[43]  
14  
15

16 On the other hand, the prevalence of anemia, iron deficiency and iron deficiency anemia found in this  
17 study is still lower compared to many developed countries. Male *C et al*, 2001 showed that the prevalence  
18 of anemia, ID and IDA was 9.4% , 7.2% and 2.3% respectively. [24] The difference in prevalence  
19 compared to this study may be attributed to the cut-off point of SF, the eligibility criteria and/or the  
20 disease determinants between the two populations. In a study from the Republic of Estonia undertaken  
21 between July 2002 to March 2005 and included 171 infants aged 9 to 12 months, the prevalence of ID and  
22 IDA was found to be 14.0% and 9.4, % respectively. The study utilized a cutoff value for Hb of <10.5  
23 g/dl and for serum ferritin of <12 µg/L. [28]  
24  
25  
26

27 In relation to the potential determinants of ID in this study, there was no statistically significant  
28 difference between male and female participants. This is consistent with Vendt *et al*,2007.[28] However ,  
29 in a study from Iran, of the 33 cases diagnosed with iron deficiency anemia, 26 children (78.8%) were  
30 males and the prevalence of iron deficiency anemia was statistically significant among male infants  
31 compared with girl infants ( $p = 0.015$ ).[44]. Another study from Iran which included 201 infants showed  
32 that the prevalence of iron deficiency anemia was 61.5% among male infants. The researchers used a  
33 multiple logistic regression model and reported that male gender was the most important iron deficiency  
34 risk factor they found in their study (OR = 3.3; 95% CI 1.7-6.3; and  $p < 0.001$ ).[45]  
35  
36  
37

38 This study found a statistically significant higher prevalence of iron deficiency among non-Qatari  
39 infants compared to their Qatari counterparts. This difference can be attributed to the possible difference  
40 in economic, social and/or nutritional attributes. Iron deficiency was more common among those infants  
41 born preterm compared to infants born full term. However, this result is not statistically significant. This  
42 finding is similar to results from other studies form Canada where prematurity and intra-uterine growth  
43 retardation are risk factors for iron deficiency and iron deficiency anemia as they cause low hepatic and  
44 bone marrow iron stores at birth.[18] A clinical report from the American Academy of Pediatrics  
45 acknowledged that the deficit of total body iron in preterm infants increases with decreasing gestational  
46 age. It is worsened by the rapid postnatal growth that many infants experience and by frequent  
47 phlebotomies without adequate blood replacement. All these are risk factors for iron deficiency. [3]  
48  
49  
50

51 Infants with low birth weight showed more possibility of having iron deficiency compared to those  
52 born with normal weight. This finding was similar to a study conducted in Estonia where the mean birth  
53 weight among the iron deficient group was significantly lower than that in the control group. [28]  
54  
55  
56  
57



1  
2  
3 As for the infant's mode of delivery in this study, those infants born through caesarean section  
4 showed higher iron deficiency rather than those born through normal delivery. This result was consistent  
5 with the result of a systematic review and meta-analysis study which indicated that caesarean section  
6 compared with vaginal delivery is associated with a reduced placental transfusion and poor iron-related  
7 hematologic indices in both cord and peripheral blood. This in turn indicates that neonates delivered by  
8 caesarean section might be more likely to develop iron deficiency anemia later in infancy compared to  
9 their normally delivered counterparts.[30]  
10  
11

12  
13 In this study, iron deficiency was more common among infants born to younger mothers aged 25  
14 years old or less (11.3%) compared to 8.1% among infants of mothers aged 26 - 35 years and 10.9% for  
15 infants of mothers aged more than 35 years. Similarly an exploratory descriptive study conducted in  
16 Egypt with 400 healthy children aged 12 to 24 month reported that iron deficiency was more prevalent  
17 among infants of mothers aged 20-29 years old (67.2%) compared with infants of mothers aged more than  
18 30 years (22.4%) and infants of mothers aged less than 20 years old (10.4%).[46]. An explanation for this  
19 may be related to the lack of infant feeding experience of young mothers. Iron deficiency was more  
20 common among infants born to illiterate mothers compared to infants born to mothers with university  
21 education or above, however the findings were not statistically significant. On the same trend, the  
22 relationship with parental education was also not statistically significant. This result is in line with the  
23 findings of a study which found a statistically significant difference between iron deficiency anemia  
24 among children below the age of two years and the level of father and mother education. The study  
25 reported that the highest percentage (32.1%) of anemia cases were belonging to infants of illiterate  
26 mothers ( $X^2=21.775$  and  $p = 0.0001$ ).[46]  
27  
28  
29  
30

31 On the other hand, a study from Iran reported that educational level of the mother did not have an  
32 effect on the iron status of infants. [44]In this study, iron deficiency was more prevalent among infants  
33 born to mothers who were housewives compared to those born to working mothers, and the relationship  
34 was statistically significant. This result is consistent with the results of a study conducted in Alexandria,  
35 Egypt, where 88.4% of infants born to non-working mothers had iron deficiency anemia, compared to  
36 only 15.4% of infants born to working mothers.[46] This finding could be explained by possible higher  
37 education and knowledge among working mothers compared to housewives, and thus better feeding  
38 practices and/or that working mothers rely more on bottle feeding (rich in iron) and have limited  
39 frequency and time for breastfeeding compared to their housewife counterparts.  
40  
41  
42

43 Prevalence of iron deficiency anemia among infants belonging to families with more than three  
44 children was higher compared to those infants born to families with 2-3 children and to families with only  
45 one child. This result is similar to results from a study which was undertaken in Iraq where low serum  
46 iron was more prevalent among families which had 4 children or more compared to families that had less  
47 than 4 children.[41] However, a study conducted in Iran in 2007report no significant difference between  
48 iron deficiency anemia prevalence and the total number of children in the infant's family ( $P > 0.05$ ).[44]  
49  
50

51 In this study, the relationship between iron deficiency among the infants studied and history of  
52 exclusive breastfeeding for six months, frequency of breastfeeding, continued breastfeeding at one year  
53 and intake of breast milk within 24 hours prior to the interview were statistically significant, These  
54 findings are in line with a study from Estonia which reported that infants who were exclusively breastfed  
55  
56  
57



1  
2  
3 until the age of 6 months had significantly lower Hb and ferritin levels than infants who were exclusive  
4 breastfed only until the age of 3 months.[28] A study from Iran reported a prevalence of iron deficiency  
5 anemia of 27% in infants exclusively breastfed up to 6 months, 16.7% in infants fed with formula milk  
6 and 100% in infants fed with cow's milk ( $p=0.033$ ).[44] The figures goes with what is known about iron  
7 content in these types of milk with it being high in formula milk and low in both breast milk and fresh  
8 cow's milk. A Canadian study indicated that prolonged exclusive breastfeeding decreases the intake of  
9 dietary iron which in turn leads to iron deficiency. This goes with the well documented fact that growing  
10 infants beyond the age of 6 months cannot fully saturate their needs for iron by continuation on exclusive  
11 breast milk. [18-22] In a study conducted in South Korea on 87 healthy full-term infants, it showed that at  
12 6 months of age; the incidences of iron deficiency and iron deficiency anemia in breast fed only were  
13 33% and 30%, respectively, significantly higher than formula fed (8% and 5%, respectively) and breast  
14 fed with iron supplementation (7% and 5%, respectively). At 12 months of age, the incidences of iron  
15 deficiency and iron deficiency anemia in breast fed were 64% and 50%, respectively, again significantly  
16 higher than the other groups. [23] The established reason is the beneficiary influence of the iron fortifying  
17 formula milks on the infants' stores of iron as demonstrated in many studies. [18,47]

21  
22  
23 In the current study, mothers were asked about frequency of consumption of different food items rich  
24 in iron, which was used to calculate the food frequency score derived from a previous study conduted in  
25 Qatar.[48] Based on their responses, a score was constructed for each consumed food item. A score of 1  
26 for no previous consumption, 2 for 1-3 times/month, 3 for 1-6 times/week and 4 for daily consumption  
27 was assigned. Food items of animal origin were summed, as well as those of plant origin and the mean  $\pm$   
28 SD was calculated for participants either with or without ID. Findings showed that infants suffered ID  
29 consumed less plants rich in iron compared to their counterparts without ID, and the difference was  
30 statistically significant ( $t$  test= 2.26 and  $p= 0.03$ ). The difference was not significant statistically when  
31 studying the animal sources of iron and the overall score of food frequency. This finding supported by the  
32 results of the above mentioned Qatari study, where iron deficiency was more common among pregnant  
33 women with high consumption of food items containing iron of plant sources ( $t$  test= 0.2 and  $p= 0.834$ )  
34 compared to food items containing iron of animal sources ( $t$  test= 1.6 and  $p= 0.100$ ). They relate this to  
35 less bio-available iron in food items of plant origin compared to animal origin.

36  
37  
38  
39 In this study, iron deficiency was more prevalent among infants who started solid, semi-solid or soft  
40 food at age of 6 months or later compared to those who started before the age of 6 months. This  
41 corresponds with the results of the Estonian study, where infants fed with solid food before 6 months had  
42 statistically higher Hb values than infants who were introduced to solid food after 6 months of life (11.8  
43 g/dl vs. 11.4 g/dl) ( $P<0.05$ ).[28] Similar findings were demonstrated in many other studies.[25,47]

44  
45  
46  
47 Regarding iron supplementation, our findings are similar with previous studies, where iron deficiency  
48 was less among infants who had history of iron supplementation. These infants also had higher Hb  
49 concentration and higher MCV. [3]A study conducted on 126 infants divided into 3 groups, where 86  
50 cases received iron supplementation irregularly, 27 cases regularly and 13 cases never received iron. IDA  
51 in the first group was 26.7%, in the second group was 3.7% and in the third group was up to 69.2%. The  
52 difference between iron deficiency anemia and iron supplementation was statistically significant ( $p<$   
53 0.001).[44]Another study reported significantly lower ferritin concentrations in 6-month-old infants who  
54 were exclusively breastfed than in infants who were breastfed and took iron supplementation. [18]

1  
2  
3  
4 In this study, a significant relationship was found between mothers receiving infant feeding  
5 counseling and prevalence of iron deficiency. A study from the US reported that iron deficiency  
6 prevalence decreased among African American children aged 1-3 years old, from 16% to 6% between  
7 years 1976 and 2002. This marked decline was attributed to implementation of the Women, Infants and  
8 Children Program which targeted specific groups of mothers and families with counseling, and this led to  
9 improvement in infant feeding practices to prevent iron deficiency.[46]  
10  
11

12  
13 In the present study, iron deficiency prevalence was more common (9.9%) among infants born to  
14 mothers with history of having four pregnancies or more, compared to (8.8%) in infants born to mothers  
15 with less than four pregnancies (including miscarriage) and the difference was statistically insignificant.  
16 The relationship may be attributed to the possible depletion of the mother's body stores of iron, especially  
17 with multiple tightly close pregnancies, as demonstrated in different reports.[18,44] In this study, iron  
18 deficiency prevalence was variable among different infant's BMI groups. These relations were  
19 statistically insignificant.  
20  
21

22  
23 On the other hand, a study conducted in the US indicated that overweight children (1-3 years old) had  
24 triple the odds of iron deficiency prevalence compared with normal weight or underweight children, as  
25 from the period of 1976 to 2002; iron deficiency prevalence remained consistently high for overweight  
26 children at 20% to 24%. [49] A second study from the US showed that iron deficiency prevalence was  
27 20% among those with overweight, 8% for those at risk for overweight, and 7% for normal-weight  
28 toddlers (1-3 years old).[50] The possible explanation to this contradiction with the results seen in the two  
29 US studies is that, anemia, iron deficiency and iron deficiency anemia is mostly related to the imbalance  
30 between iron needs and dietary sources of iron, rather than the relation with the caloric content of infant's  
31 nutrition. In addition to the small number of participated infants among wasted and severely wasted group  
32 in this study.  
33  
34  
35

## 36 **Conclusion**

37  
38 Although iron deficiency and iron deficiency anemia among infants in the State of Qatar are less  
39 prevalent compared to several developing countries including those in the EMR, they are still relatively  
40 higher than rates seen in the developed ones. The prevalence of anemia in this study was 23.5%, of iron  
41 deficiency was 9.2% and of iron deficiency anemia was 7.8%. Iron deficiency was significantly  
42 associated with infants who were non-Qatari, had a non-employed mother, belonged to a family with low  
43 total monthly income, exclusively breastfed for 6 months, breastfed more frequently, continued  
44 breastfeeding at the age of one year, breastfed within the last 24 hours prior to the interview, never took  
45 infant formula milk, frequently consumed plant sources of dietary iron and had a mother that did not  
46 receive infant feeding counseling.  
47  
48  
49

50  
51 Although iron deficiency and iron deficiency anemia among infants in the State of Qatar are less  
52 prevalent compared to several developing countries including those in the EMR, they are still relatively  
53 higher than rates seen in the developed ones. The prevalence of anemia in this study was 23.5%, of iron  
54 deficiency was 9.2% and of iron deficiency anemia was 7.8%. Iron deficiency was significantly  
55 associated with infants who were non-Qatari, had a unemployed mother, belonged to a family with low  
56  
57

total monthly income, exclusively breastfed for 6 months, breastfed more frequently, continued breastfeeding at the age of one year, breastfed within the last 24 hours prior to the interview, never took infant formula milk, frequently consumed plant sources of dietary iron and had a mother that did not receive infant feeding counseling.

The study fill gaps in knowledge necessary to plan public health interventions at national as well as regional level in the Gulf Cooperation Council (GCC) countries.

## Recommendations

Integration of mass iron deficiency and iron deficiency anemia screening prior to 12 months visit to allow for early intervention in addition to proper counseling regarding and breast feeding and proper weaning practice.

## Acknowledgments

We are extremely grateful to all the mothers who took part in this study, the staff of the well-baby clinics, data collectors and Dr. Rajvir Singh for his invaluable statistical assistance, support and guidance.

## Ethical approval

Appropriate approvals obtained from the Arab Board of Medical Specialization, Institutional Review Board of Hamad Medical Corporation and the Primary Health Care Corporation Research Committee.

## Funding

The funding of this study is received from the Research Center at Hamad Medical Corporation, state of Qatar.

## Patient consent

Mothers of participants were consented in written after appropriate description of the study aim and value.

## Competing interest

None declared.

## Figure legends

**Figure (1):** Among the three hundred and six infants of completed 12 months of age and lesser than 13 months; 72 (23.5%) had anemia which defined as hemoglobin <11.1 g/dl (normal reference range is 11.1-14.1 g/dl), 28 (9.2%) had iron deficiency (ID) which defined as Serum Ferritin (SF) below normal reference range (6-24 ug/L) in absence of high C-Reactive Protein (CRP), and 24 (7.8%) had iron deficiency anemia (IDA) which defined by combination of three elements - hemoglobin <11.1 g/dl

(normal reference range is 11.1-14.1 g/dl), low SF (<6 mcg/L) and absence of high CRP (reference level is normally less than 5 mg/L).

### Data sharing statement

No additional data are available.

### Contribution to authorship

AJZ, NAS and SAK designed the study and wrote the primary proposal. AJZ and SAK managed data collection and fieldwork. SRO and AJZ did literature review, data analysis, results interpretation and wrote the discussion. AJZ, SRO and NAS drafted and revised the manuscript. AJZ finalized and submitted the manuscript.

### References

1. Worldwide prevalence of anaemia, WHO Vitamin and Mineral Nutrition Information System, 1993–2005. WHO press 2008. Available from: <http://www.who.int/nutrition/publications/micronutrients/PHNmay2008.pdf> (accessed 20 May 2014)
2. Zetterström R, Iron deficiency and iron deficiency anaemia during infancy and childhood. *Acta Paediatr* 2004;93(4):436-9.
3. Robert D, Baker MD, Frank R, et al. Clinical Report: Diagnosis and Prevention of Iron Deficiency and Iron-Deficiency Anemia in Infants and Young Children (0 –3 Years of Age). *AAP* 2010;126:1040-50.
4. Halterman JS, Kaczorowski JM, Aligne CA, et al. Iron deficiency and cognitive achievement among school-aged children and adolescents in the United States. *Pediatrics* 2001;107:138-386.
5. Szajewska H, Rusczyński M, Chmielewska A. Effects of iron supplementation in non-anemic pregnant women, infants, and young children on the mental performance and psychomotor development of children: a systematic review of randomized controlled trials. *Am J Clin Nutr* 2010;91:1684-90.
6. Anaemia. WHO. 2013. [www.who.int/topics/anaemia/en/](http://www.who.int/topics/anaemia/en/) (accessed 22 May 2014)
7. Micronutrient deficiencies. WHO. 2013. [www.who.int/nutrition/topics/ida/en/index.html](http://www.who.int/nutrition/topics/ida/en/index.html) (accessed 18 Jun 2014)
8. World Health Organization. Malnutrition: the global picture. Geneva: The Organization; 2000.
9. Yip R. The challenge of improving iron nutrition: limitations and potentials of major intervention approaches. *Eur J Clin Nutr* 1997;51:516-24.
10. Lawson MS, Thomas M, Hardiman A. Iron status of Asian children aged 2 years living in England. *Arch Dis Child* 1998;78:420-26.
11. Karr MA, Mira M, Alperstein G, Labib S, Webster BH, Lammi AT et al. Iron deficiency in Australian-born children of Arabic background in central Sydney. *Med J Aust* 2001;174:165-8.
12. Booth IW, Aukett MA. Iron deficiency anaemia in infancy and early childhood. *Arch Dis Child* 1997;76:549-54.
13. Anemia prevention and control. WHO; 2013. Available from: [http://www.who.int/medical\\_devices/initiatives/anaemia\\_control/en/index.html](http://www.who.int/medical_devices/initiatives/anaemia_control/en/index.html) (accessed 26 May 2014)
14. Stoltzfus RJ. Iron deficiency: global prevalence and consequences. *Food Nutr Bull* 2003 Dec;24(4):S99-103.

15. Mirmiran P, Golzarand M, Serra-Majem L, et al. Iron, Iodine and Vitamin A in the Middle East; A Systematic Review of Deficiency and Food Fortification. *Iranian J Publ Health*. 2012;41(8):8-19.
16. Anaemia. WHO; 2013. [www.emro.who.int/healthtopics/anaemia/index.html](http://www.emro.who.int/healthtopics/anaemia/index.html) (accessed Jun 2014)
17. Dallman PR. Changing iron needs from birth through adolescence. 39. Dallman PR. Changing iron needs from birth through adolescence. In: Fomon SJ, Zlotkin SH, editors. Nutritional anemias. Nestle Nutrition Workshop Series. New York: *Vevey/Raven Press*; 1992:29-38. [www.nestlenutrition-institute.org/docs/default-source/global-dcoument-library/publications/secured/7fe7d3964ce56230a9d3622ffb3a44a5.pdf?sfvrsn=0](http://www.nestlenutrition-institute.org/docs/default-source/global-dcoument-library/publications/secured/7fe7d3964ce56230a9d3622ffb3a44a5.pdf?sfvrsn=0) (accessed 12 Jun 2014)
18. Zlotkin S. Clinical nutrition: 8. The role of nutrition in the prevention of iron deficiency anemia in infants, children and adolescents. *CMAJ*. 2003;168(1):59-63.
19. Dallman PR. Nutritional anemias in childhood: iron, folate and vitamin B12. In: Suskind RM, LewinterSuskind L, eds. Textbook of Pediatric Nutrition. 2nd ed. New York: *Raven Press*; 1993:91-105.
20. Aggett, P. Iron for the suckling. Iron nutrition in childhood. *ActaPaediatrScand* 1989;78(361):96-102.
21. Kim HJ, Kim DH, Lee EJ, et al. Is It Possible to Predict the Iron Status from an Infant's Diet History?. *PediatrGastroenterolHepatolNutr* 2013;16(2):95-103.
22. Infant young child feeding counselling: An integrated course. Geneva, Switzerland. WHO. 2006. [whqlibdoc.who.int/publications/2006/9789241594769\\_eng.pdf](http://whqlibdoc.who.int/publications/2006/9789241594769_eng.pdf) (accessed 16 Oct 2014)
23. Noh SJ, Na B, Kim MJ. Iron deficiency and early, low-dose iron supplementation in breastfed infants. *Korean J PediatrGastroenterolNutr* 2008 Sep;11(2):169-78.
24. Male C, Persson LA, Freeman V, et al. Prevalence of iron deficiency in 12-mo-old infants from 11 European areas and influence of dietary factors on iron status (Euro-Growth study). *ActaPaediatr* 2001 May;90(5):492-8.
25. Chang JH, Cheong WS, Jun YH, et al. Weaning food practice in children with iron deficiency anemia. *Korean J Pediatr* 2009 Feb;52(2):159-66.
26. Global Strategy for Infant and Young Child Feeding, 2013. WHO. [www.who.int/nutrition/topics/global\\_strategy/en/index.html](http://www.who.int/nutrition/topics/global_strategy/en/index.html) (accessed 16 Oct 2014)
27. Infant and young children feeding, a tool for assessing national practices, policies and programmes. WHO publications. [http://www.who.int/nutrition/publications/inf\\_assess\\_nnpp\\_ref\\_eng.pdf](http://www.who.int/nutrition/publications/inf_assess_nnpp_ref_eng.pdf)
28. Vendt N, Grünberg H, Leedo S, et al. Prevalence and causes of iron deficiency anemias in infants aged 9 to 12 months in Estonia. *NCBI* 2007;43(12):947-52.
29. Miller CJ, Dunn EV, Abdouni SF, et al. Factors associated with iron depletion and iron deficiency anemia among Arabic preschool children of the United Arab Emirates. *Saudi Med J* 2004 Jul;25(7):843-7.
30. Zhou YB, Li HT, Zhu LP, Liu JM. Impact of cesarean section on placental transfusion and iron-related hematological indices in term neonates: a systematic review and meta-analysis. *Epub* 2014;35(1):1-8.
31. Eden AN, Sandoval C. Iron deficiency in infants and toddlers in the United States. *PediatrHematolOncol* 2012;29:704-9.
32. Altuntas N, Beken S, Kulali F, et al. Prevalence of iron deficiency at the first age of the infants hospitalized in neonatal period. *TransfusApherSci* 2012;47:85-9.
33. Iron Deficiency Anaemia Assessment, Prevention and Control: A guide for programme manager. *WHO press* 2001; WHO/NHD/01.3. [www.who.int/nutrition/publications/micronutrients/anaemia\\_iron\\_deficiency/WHO\\_NHD\\_01.3/en/](http://www.who.int/nutrition/publications/micronutrients/anaemia_iron_deficiency/WHO_NHD_01.3/en/) (accessed 16 Oct 2014)
34. PHCC. Well baby clinic protocol. Doha, Qatar: *PHCC*; 2011.



- 1
- 2
- 3
- 4 35. World Health Organization. WHO Child Growth Standards: Methods and development. Geneva:  
5 World Health Organization, 2006. Available from:  
6 [http://www.who.int/childgrowth/standards/Technical\\_report.pdf?ua=1](http://www.who.int/childgrowth/standards/Technical_report.pdf?ua=1) (accessed 15 Jun 2014)
- 7 36. World Health Organization. Training Course on Child Growth Assessment. Geneva, WHO, 2008.  
8 Available from:  
9 [http://www.who.int/childgrowth/training/module\\_c\\_interpreting\\_indicators.pdf](http://www.who.int/childgrowth/training/module_c_interpreting_indicators.pdf)(accessed 15 Jun  
10 2014)
- 11 37. Stevens GA, Finucane MM, De-Regil LM, et al. Global, regional, and national trends in haemoglobin  
12 concentration and prevalence of total and severe anaemia in children and pregnant and non-pregnant  
13 women for 1995–2011: a systematic analysis of population-representative data. *Lancet Glob Health*  
14 2013 Jul;1(1):e16-e25.
- 15 38. Bagchi K. Nutrition in the Eastern Mediterranean Region of the World Health Organization. *EMHJ*  
16 2008;14:S107-S113.
- 17 39. Babiker MA, Bahakim HM, al-Omair AO, et al. Prevalence of iron deficiency in Saudi children from  
18 birth to 15 months of age. *Ann Trop Paediatr* 1989;9:111-4.
- 19 40. Assiri F, Al-Sumaie M, Safar F, et al. Prevalence and associated factors of iron deficiency anemia  
20 among Kuwaiti children. *Bull Alex Fac Med* 2006;42(2).
- 21 41. Alkhateeb N. Risk factors associated with iron deficiency among children admitted to paediatric  
22 emergency unit in Erbil, Iraq. *Zanco J Med Sci* 2010;14(3):1-8.
- 23 42. Elalfy MS, Hamdy AM, Maksoud SS, et al. Pattern of milk feeding and family size as risk factors for  
24 iron deficiency anemia among poor Egyptian infants 6 to 24 months old. *Nutr Res* 2012;32(2):93-9.
- 25 43. Mahmoud H, Muddathir A, Osman S, et al. Iron deficiency anemia among children under three years  
26 in Kassala, Eastern Sudan. *Sudanese journal of public health* 2014;9:33-7.
- 27 44. Monajemzadeh SM, Zarkesh MR. Iron deficiency anemia in infants aged 12-15 months in Ahwaz,  
28 Iran. *Indian J PatholMicrobiol* 2009;52:182-4.
- 29 45. Antunes H, Santos C, Carvalho S, et al. male gender is an important clinical risk factor for iron  
30 deficiency in healthy infants. *Clinical Nutrition ESPEN* 2012;7(6):e219-e222.
- 31 46. Mohamed A, abo-donia A. Contributing factors of iron deficiency anemia among children under two  
32 years attending family health centers in Alexandria. *Life Science Journal* 2011;8(4):996-1007.
- 33 47. Shaw V, McCrann U. Infant feeding: weaning. London, UK: Great Ormond Street Hospital; 2012.  
34 [www.gosh.nhs.uk/health-professionals/clinicalguidelines/infant-feeding-eaning/#Rationale](http://www.gosh.nhs.uk/health-professionals/clinicalguidelines/infant-feeding-eaning/#Rationale) (accessed  
35 17 Oct 2014)
- 36 48. Al-Mass M, Selim NA, Al-Kuwari M, Ismail MS. Assessment of Anemia, IDA and ID among  
37 Pregnants in Qatar: Cross Sectional Survey. *SM J Public Health Epidemiol* 2016; 2(3): 1035.
- 38 49. Brotanek JM, Gosz J, Weitzman M, et al. Secular trends in the prevalence of iron deficiency among  
39 US toddlers, 1976-2002. *Arch PediatrAdolesc Med* 2008 Apr;162(4):374-81.
- 40 50. Brotanek JM, Gosz J, Weitzman M, Flores G. Iron deficiency in early childhood in the United States:  
41 risk factors and racial/ethnic disparities. *Pediatrics* 2007 Sep;120(3):568-75.  
42  
43  
44  
45  
46  
47  
48  
49  
50  
51  
52  
53  
54  
55  
56  
57  
58  
59  
60

1  
2  
3  
4  
5  
6  
7  
8  
9  
10  
11  
12  
13  
14  
15  
16  
17  
18  
19  
20  
21  
22  
23  
24  
25  
26  
27  
28  
29  
30  
31  
32  
33  
34  
35  
36  
37  
38  
39  
40  
41  
42  
43  
44  
45  
46  
47  
48  
49  
50  
51  
52  
53  
54  
55  
56  
57  
58  
59  
60

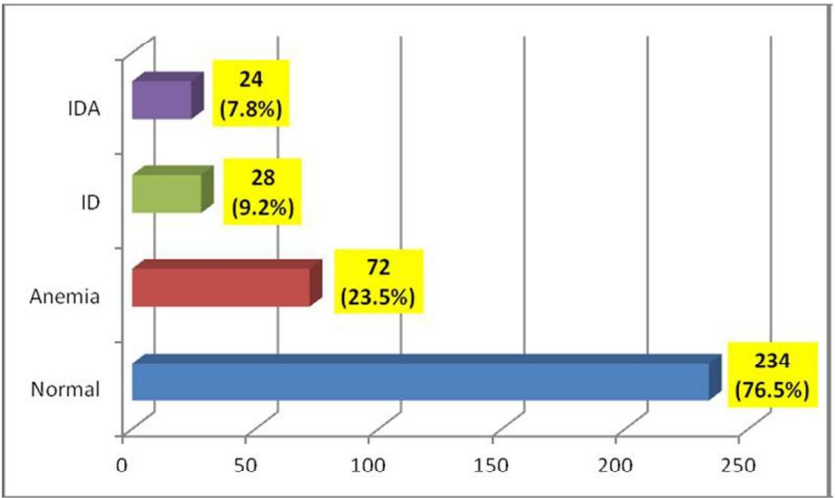

Figure (1): Distribution of study infants according to their anemia, iron deficiency and iron deficiency anemia status

81x60mm (300 x 300 DPI)

Only



## STROBE Statement checklist

| Item                      | Item number | Status   | Page number |
|---------------------------|-------------|----------|-------------|
| <b>Title and abstract</b> | 1           | Included | 1, 2        |
| <b>Introduction</b>       |             |          |             |
| Background/rationale      | 2           | Included | 2, 3, 4     |
| Objectives                | 3           | Included | 4           |
| <b>Methods</b>            |             |          |             |
| Study design              | 4           | Included | 4           |
| Setting                   | 5           | Included | 4           |
| Participants              | 6           | Included | 4           |
| Variables                 | 7           | Included | 4, 5        |
| Data sources/ measurement | 8           | Included | 5           |
| Bias                      | 9           | Included | 2           |
| Study size                | 10          | Included | 4           |
| Quantitative variables    | 11          | Included | 4           |
| Statistical methods       | 12          | Included | 5           |
| <b>Results</b>            |             |          |             |
| Participants              | 13          | Included | 5 - 9       |
| Descriptive data          | 14          | Included | 5 - 9       |
| Outcome data              | 15          | Included | 5 - 9       |
| Main results              | 16          | Included | 5 - 9       |
| Other analyses            | 17          | -        | -           |
| <b>Discussion</b>         |             |          |             |
| Key results               | 18          | Included | 9 - 13      |
| Limitations               | 19          | Included | 2           |
| Interpretation            | 20          | Included | 13          |
| Generalizability          | 21          | Included | 13          |
| <b>Other information</b>  |             |          |             |
| Funding                   | 22          | Included | 14          |

# BMJ Open

## Iron deficiency, its epidemiological features and feeding practices among infants aged 12 months in Qatar, a cross-sectional study

|                                 |                                                                                                                                                                                                                                                                                                                                                                                                                                        |
|---------------------------------|----------------------------------------------------------------------------------------------------------------------------------------------------------------------------------------------------------------------------------------------------------------------------------------------------------------------------------------------------------------------------------------------------------------------------------------|
| Journal:                        | <i>BMJ Open</i>                                                                                                                                                                                                                                                                                                                                                                                                                        |
| Manuscript ID                   | bmjopen-2017-020271.R2                                                                                                                                                                                                                                                                                                                                                                                                                 |
| Article Type:                   | Research                                                                                                                                                                                                                                                                                                                                                                                                                               |
| Date Submitted by the Author:   | 08-Feb-2018                                                                                                                                                                                                                                                                                                                                                                                                                            |
| Complete List of Authors:       | Zainel, A.Jaleel; Primary Health Care Corporation, Clinical Affairs<br>Osman, Sherif ; Alexandria University High Institute of Public Health;<br>Primary Health Care Corporation, Family and Community Medicine<br>Al-Kohji, Sadriya; Primary Health Care Corporation, Service Development<br>Selim, Nagah; Cairo University, Public Health and Preventive Medicine;<br>Primary Health Care Corporation, Family and Community Medicine |
| <b>Primary Subject Heading</b>: | Epidemiology                                                                                                                                                                                                                                                                                                                                                                                                                           |
| Secondary Subject Heading:      | Public health                                                                                                                                                                                                                                                                                                                                                                                                                          |
| Keywords:                       | iron deficiency, feeding, infants, Qatar                                                                                                                                                                                                                                                                                                                                                                                               |
|                                 |                                                                                                                                                                                                                                                                                                                                                                                                                                        |

SCHOLARONE™  
Manuscripts

1  
2  
3 **Iron deficiency, its epidemiological features and feeding practices among infants aged 12**  
4 **months in Qatar, a cross-sectional study**  
5  
6  
7

8 **Corresponding author and PI:**  
9

10 **Dr. Abdul Jaleel Zainel** MBBch, ABCM

11 Community Medicine Specialist, Primary Health Care Corporation, Doha, Qatar

12 E-mail: azainel@phcc.gov.qa

13 P.O. Box 55772, Doha, Qatar

14 Cell phone: + (974) 55087676

15  
16  
17  
18  
19 **CO-PIs:**  
20

21 **Dr. Sherif R. Omar** MBBch, DPH, DM, FRCP, DTM&H, Dr PH

22 Associate Professor of Public and Tropical Health, High Institute of Public Health, University of  
23 Alexandria, Egypt / Community Medicine Consultant, Primary Health Care Corporation, Doha, Qatar

24 E-mail: shosman@phcc.gov.qa / sherif\_omar67@yahoo.com

25 Office phone: + (974) 4407 0371, Cell phone: + (974) 33751401

26  
27  
28  
29  
30 **Dr. Sadriya Al Kohji** MBBch, ABCM

31 Community Medicine Consultant, Primary Health Care Corporation, Doha, Qatar

32 E-mail: salkohji@phcc.gov.qa

33 Cell phone: + (974) 55812292

34  
35  
36  
37 **Dr. Nagah A. Selim** MBBch, MPH, PhD

38 A / Professor of Public Health and Preventive Medicine, Cairo University, Egypt /Associate Program  
39 Director, Community Medicine Residency Program, Primary Health Care Corporation, Doha, Qatar

40 E-mail: nselim@phcc.gov.qa

41 Office phone: + (974) 4407 0341, Cell phone: + (974) 66083921

42  
43  
44  
45  
46  
47 **WORD COUNT**

48 4699 words  
49  
50  
51  
52  
53  
54  
55  
56  
57  
58  
59  
60

## Abstract

**Objectives** To estimate the magnitude of anemia, iron deficiency (ID), iron deficiency anemia (IDA) and to explore epidemiological features of ID and feeding practices among infants aged 12 months in Qatar.

**Setting** Well baby clinics in 14 randomly selected primary health care centers covering all geographical areas on the national level.

**Participants** Three hundred and six (163 male and 143 female) infants of all nationalities were enrolled. Mothers were asked to complete a predesigned interview questionnaire and infants were blood tested for anemia, ID and IDA.

**Outcome measures** Cutoff point used to diagnose anemia was hemoglobin (Hb) <11.1g/dl, and to diagnose ID, serum ferritin (SF) <6 ug/l with normal C-reactive protein (CRP).

**Results** Prevalence of anemia was 23.5%, ID was 9.2% and IDA was 7.8%. ID was more prevalent among non-Qatari infants compared to Qatari (10.9% vs. 1.7%,  $p=0.029$ ), more prevalent among infants born to housewives and to families of low income ( $p\leq 0.05$ ). With regard to feeding practice, ID was higher in infants who continued breastfeeding until the age of one year and among those who never took infant formula milk ( $p\leq 0.05$ ). Mothers who received infant feeding counseling had less ID occurrence among their infants compared to their counterparts who did not receive such counseling (4.2% vs. 13.4%,  $p=0.005$ ).

**Conclusion:** Although ID and IDA among infants in Qatar are less prevalent compared with many developing countries, still further efforts are needed for improvement towards more developed countries. Efforts should be contextualized and target the key epidemiological features with special emphasis on infant feeding and infant feeding counselling to mothers.

**Key words:** Iron, Anemia, Prevalence, feeding, 12 months infants, Qatar

### Strengths and limitations of this Study

- The first population-based study about ID and IDA among infants in Qatar.
- Covering a critical age of infancy (12 months) where feeding and weaning practices can influence the health and wellbeing of the child.
- Being a cross-sectional study where temporality cannot be demonstrated.
- A prospective study design would have overcome potential recall bias; however, it was not feasible to undertake one at the time due to shortage of resources.
- Differences in the applied diagnostic criteria and laboratory cutoff values in identification of anemia, ID and IDA across different studies limit the ability of a precise comparison.

### Introduction

Infants and young children are vulnerable to anemia especially iron deficiency anemia (IDA), which represents a public health problem with defined impacts on the health of communities.[1] Published evidence suggests that early infant feeding practices play a major role in the prevalence of iron deficiency (ID) and IDA.[2,3] Anemia early in life, with or without iron depletion, is known to seriously affect children's general health and immunity, retarding their growth and development by causing multiple disorders and abnormalities in different body systems.[3-5]

1  
2  
3 Anemia may be defined as hemoglobin (Hb) concentration 2 standard deviations (SD) below the  
4 mean Hb concentration for a normal population of the same gender and age range. ID, the commonest  
5 cause of anemia, is characterized by a depletion of iron in various body compartments and / or tissues.  
6 IDA is said to exist when ID is severe enough to significantly affect erythropoiesis.[3,6] IDA is a  
7 preventable and a treatable condition, therefore, early diagnosis represents the cornerstone in protection  
8 from its adverse consequences and combating its contributing factors.  
9  
10

11 Globally, ID is the most common and widespread nutritional disorder affecting all age groups,  
12 particularly children in developing countries where prevalence as high as 50% have been reported among  
13 infants aged 12 months in some countries. IDA is a leading cause of mortality and morbidity among  
14 infants worldwide and some of its manifestations are possibly irreversible.[7-14] In a systematic review  
15 done in 2012 to evaluate micronutrient deficiencies and food fortification in the Middle East, ID  
16 represented one of the three commonest micronutrient deficiencies in the region in addition to iodine and  
17 vitamin A.[15] According to the World Health Organization (WHO) in 2013, 63% of children under-5 in  
18 the Eastern Mediterranean Region (EMR) had IDA and in some studies, anemia among preschool  
19 children showed similarly high rates.[16]  
20  
21

22 Iron transfer from mother to fetus occurs mainly during the third trimester of pregnancy and is stored  
23 mainly in the liver and bone marrow. Thus, the amount of iron present at birth depends on the gestational  
24 age and weight of the baby.[17] Full term infants usually have sufficient iron stores until 4 to 6 months of  
25 age. During the infantile growth spurt, human milk (which contains 0.2–0.3 mg/L of iron) may not  
26 provide enough iron to meet high demands for rapid growth and erythropoiesis. Therefore, existing iron  
27 stores are mobilized to meet the iron requirements of the infant mostly around the age of 4-6 months. This  
28 may result in stores being generally depleted by the age of 6 months, yet from 4 to 12 months after birth,  
29 the infant's blood volume doubles, causing a 'physiologically dilution effect' for red blood cells and Hb.  
30 Thus at this age, dietary sources of iron become critical to keep up with the rapid rate of growth and red  
31 blood cell synthesis.[18-22]  
32  
33  
34

35 Studies have shown that increased nutritional requirements during the growth spurt, may often leads  
36 to a negative nutrient balance.[2] In general, prolonged exclusive breastfeeding (more than 6 months)  
37 predisposes to decreased dietary iron intake and may lead to iron depletion.[18,23] Male *et al.* in 2001  
38 indicated that feeding with iron-fortified formula positively influenced iron status among infants up to  
39 the age of 12 months. There was also a positive association with consumption of cereals and iron  
40 supplements.[24] Inadequate complementary feeding practices which represent an important risk factor  
41 for IDA are characterized by consumption of foods with low amounts of bio-available iron or foods  
42 with inhibitors to iron absorption. Such practices often extend up to the age of 2 years.[18,25]  
43  
44  
45

46 Infant feeding counseling offered to mothers and other caregivers on how to gradually  
47 increase consistency and quantity of foods also assists in prevention of micronutrient  
48 deficiency.[26,27] Preterm babies, as well as, those born small for gestational age, are particularly  
49 vulnerable to ID in their first months of life.[2,28,29] Infants delivered by cesarean section are more  
50 likely to get ID, as their delivery is associated with reduced placental transfusion and poor iron-related  
51 hematologic indices in both cord and peripheral blood.[30]  
52  
53

54 Prevention and control strategies against IDA are mainly dependent on the timing of diagnosis and  
55 start of treatment.[7] The WHO "Global Strategy for Infant and Young Child Feeding" was developed as  
56  
57

guidance to the prevention of micronutrient deficiencies including ID and IDA.[26] Many studies indicate that incidence of IDA has significantly decreased over time due to promotion of breastfeeding, improvement of overall nutritional status and use of iron-fortified baby foods.[31,32]

In Qatar, Well Baby Clinic (WBC) services provided at the primary health care (PHC) centers include routine screening of infants for anemia during their MMR vaccination visit at 12 months of age but routine screening for ID or IDA is not undertaken.[8] Previous studies in Qatar have focused on the extent of anemia but not specifically on ID or IDA in this age group. This study investigates the prevalence of ID and IDA and the correlates of ID among infants at 12 months of age, as well as infant and child feeding practices among mothers of all nationalities resident in Qatar. The current study provides a much needed first snapshot of the extend of problem in the State of Qatar.

## Methods

A cross sectional study was conducted at WBCs in Primary Health Care Corporation (PHCC) centers. These clinics provide comprehensive evidence-based services to all children under the age of 5 years. Of the 21 PHCC centers across Qatar operating at time of the study, 14 were providing the WBC service. Infants in the WBC appointment system who attended the selected centers seeking WBC services for the 12 month visit and met the eligibility were included in the study sample. Mothers of all participating infants signed an informed consent form.

**Eligibility criteria:** Male and female infants completed 12 months of age (but less than 13 months) and of all nationalities (Qatari and non-Qatari) attending WBCs at their routine 12 month's visit were eligible. Participants diagnosed with sickle cell anemia or thalassemia were excluded.

**Sample size calculation and sampling technique:** As ID prevalence in Qatar was not available; the latest published prevalence of ID in the nearest regional country (The United Arab Emirates) of 26 % was used to calculate the sample size.[29] It was estimated that a sample size of 292 is required for the study. To compensate for possible non-responders, an additional 20% were added bringing a total of 350 after rounding. A 95% confidence level and 5% error rate were used for the calculation. Data from the 12 months vaccination coverage rates calculated by the PHCC in Qatar confirmed by its head of child health section shows a vaccination coverage rate of over 97% at this age, Therefore participants recruited are considered a representative sample of the national population. A systematic random sampling technique was used to recruit study participants. The sampling frame was drawn from the daily appointment list in WBCs. The first participant of the day was selected from the list and subsequent participants were selected randomly. The study took place in the period between September 2014 and May 2015.

**Study variables:** Dependent (outcome variables) measured included 'ID', defined as SF below normal reference range (6-24 ug/L) in the absence of high CRP.[3,33], and 'IDA' defined by a combination of three elements - Hb <11.1 g/dl (normal reference range is 11.1-14.1 g/dl), low SF (<6 mcg/L) and absence of high CRP (reference level is normally less than 5 mg/L).[3,6,33,34] Hb was determined using Sysmex 500 I machines to determine the complete blood picture and count. Ferritin was determined using Cobas Integra 400 plus machine. The technique was particle enhanced immunoturbidimetric assay utilizing human ferritin agglutination with latex particles coated with anti-ferritin antibodies. The precipitate is determined turbidimetrically at 570/800 nm.



1  
2  
3 Independent (exposure) variables included socio-demographic characteristics of infants and their parents,  
4 birth history of the participant, history of maternal pregnancies, breastfeeding, intake of infant formula  
5 milk, iron supplementation, infant feeding counseling to mothers, body mass index (BMI) calculation,  
6 as well as, frequency of consumption of different food groups. Mothers were interviewed about frequency  
7 of infant's consumption of different food items rich in iron. Based on their responses, a food frequency  
8 score was calculated for each consumed food item according to the following criteria: A score of 1 for no  
9 previous consumption, 2 for 1-3 times/month, 3 for 1-6 times/week and 4 for daily consumption. Food  
10 items of animal origin were summed up as well as those of plant origin and the mean ( $\pm$ SD) was  
11 calculated for participants either with or without ID.  
12  
13  
14

15 **Data collection tools:** The research team developed an interview-administered questionnaire after  
16 extensive literature review to establish content and face validity, followed by thorough discussion and  
17 assessment by experts in the fields of pediatric hematology and community medicine. A pilot was  
18 undertaken over 20 participants, conveniently sampled, to establish and confirm its suitability. Necessary  
19 adjustments were made accordingly. Anthropometric measurements of participants were acquired in order  
20 to calculate BMI. Laboratory results of participants were retrieved from their electronic medical record  
21 using a data extraction sheet. Venous blood samples are collected routinely by well baby clinics for all 12  
22 months aged infants as per their protocol to check for anemia. Additional laboratory studies for ID  
23 detection utilizing these samples were managed in hematology laboratory of the Qatar's secondary health  
24 care provider; Hamad Medical Corporation (HMC).  
25  
26  
27

28 **Data analysis:** Statistical Package for Social Sciences IBM-SPSS<sup>®</sup> version 20 was used for data entry and  
29 analysis. Descriptive analysis was undertaken (*frequency distribution tables, proportions, mean and*  
30 *standard deviation*), in addition to analytical statistics (*Chi-square test and fisher exact probability test*)  
31 were used to assess differences between two or more proportions and the *Student t test* was used to  
32 compare continuous variables. An *Alpha (p)* value of  $\leq 0.05$  was used as the cut-off level of significance.  
33  
34  
35

36 **Quality control measures:** The questionnaire was pre-tested using a convenient sample of 20 infants.  
37 Their data was omitted prior to analysis. Content and face validity were established using extensive  
38 literature review and consultation with academic experts in community medicine and experts in the fields  
39 of hematology and pediatrics. The main researchers did all data entry and review. Standardized methods  
40 of blood collection and automated measures for blood analysis were used to ensure reliability of the study  
41 results.  
42  
43

44 **Ethical considerations:** Ethical approvals were obtained prior to fieldwork from PHCC and HMC ethical  
45 review boards. Permission was also obtained from PHCC center directors, as well as, mothers of infants  
46 identified for the study. The methodology of the study was fully described to the ethical review board to  
47 allow possible inconvenience resulting from extra blood withdrawal. Privacy and confidentiality of  
48 participant's data was assured. Mothers were invited to participate voluntarily and allowed to withdraw at  
49 any time during the study.  
50  
51

## 52 **Results**

53  
54  
55  
56  
57  
58  
59  
60

Of the total 350 study participants identified, laboratory data was available for 306 of them giving a response rate of 87.4%, but still over the figure required by calculation for statistical relevance (i.e. n=292). **Figure (1)** demonstrates the prevalence of the dependent variables.

As shown in **Table (1)**, when the relation between ID and background characteristics of the infants was assessed, it was found that ID is more common in males. However the relationship was not statistically significant. There was a statistically significant higher prevalence of ID among Non-Qatari infants compared to their Qatari counterparts.

**Table (1): Relation between ID and infants' background characteristics**

| Characteristic                         | No ID (%)  | ID (%)    | Total | $\chi^2$ | <i>p</i> value |
|----------------------------------------|------------|-----------|-------|----------|----------------|
| <b>Gender</b>                          |            |           |       |          |                |
| Male                                   | 146 (89.6) | 17 (10.4) | 163   | 0.686    | 0.265          |
| Female                                 | 132 (92.3) | 11 (7.7)  | 143   |          |                |
| <b>Nationality</b>                     |            |           |       |          |                |
| Qatari                                 | 57 (98.3)  | 1 (1.7)   | 58    | 4.748    | <b>0.029</b>   |
| Non Qatari                             | 221 (89.1) | 27 (10.9) | 248   |          |                |
| <b>Gestational age</b>                 |            |           |       |          |                |
| Pre-term (< 37 weeks)                  | 23 (88.5)  | 3 (11.5)  | 26    | 0.195    | 0.433          |
| Full-term ( $\geq$ 37 weeks)           | 255 (91.1) | 25 (8.9)  | 280   |          |                |
| <b>Birth weight</b>                    |            |           |       |          |                |
| Low (< 2500 grams)                     | 18 (90)    | 2 (10.0)  | 20    | 0.019    | 0.565          |
| Normal ( $\geq$ 2500 grams)            | 260 (90.9) | 26 (9.1)  | 286   |          |                |
| <b>Mode of child delivery</b>          |            |           |       |          |                |
| Normal                                 | 183 (91.5) | 17 (8.5)  | 200   | 0.294    | 0.364          |
| Caesarean section                      | 95 (89.6)  | 11 (10.4) | 106   |          |                |
| <b>Twins, triple or multiple birth</b> |            |           |       |          |                |
| No                                     | 270 (90.6) | 28 (9.4)  | 298   | 0.827    | 0.460          |
| Yes, twins                             | 8 (100)    | 0 (0)     | 8     |          |                |

In terms of background characteristics of parents, the relation of ID with mother's employment status and the family income were found to be statistically significant, as shown in **Table (2)**.

**Table (2): Relation between ID and infants parents background characteristics**

| Characteristic                                              | No ID (%)  | ID (%)   | Total | $\chi^2$ | <i>p</i> value |
|-------------------------------------------------------------|------------|----------|-------|----------|----------------|
| <b>Mother's age</b>                                         |            |          |       |          |                |
| $\leq$ 25 years                                             | 55 (88.7)  | 7 (11.3) | 62    | 0.778    | 0.678          |
| 26 – 35 years                                               | 182 (91.9) | 16 (8.1) | 198   |          |                |
| More than 35 years                                          | 41 (89.1)  | 5 (10.9) | 46    |          |                |
| <b>Number of mother's pregnancy (including miscarriage)</b> |            |          |       |          |                |
| < 4                                                         | 187 (91.2) | 18 (8.8) | 205   | 0.102    | 0.749          |
| > 4                                                         | 91 (90.1)  | 10 (9.9) | 101   |          |                |
| <b>Mother's education level</b>                             |            |          |       |          |                |
| Illiterate                                                  | 6 (75.0)   | 2 (25.0) | 8     | 3.598    | 0.165          |
| Up to secondary school                                      | 91 (93.8)  | 6 (6.2)  | 97    |          |                |

|                                               |            |           |     |        |        |
|-----------------------------------------------|------------|-----------|-----|--------|--------|
| University educated and above                 | 181 (90.0) | 20 (10.0) | 201 |        |        |
| <b>Father's education level</b>               |            |           |     |        |        |
| Up to secondary school                        | 93 (93.0)  | 7 (7.0)   | 100 |        |        |
| University educated and above                 | 185 (89.8) | 21 (10.2) | 206 | 0.826  | 0.246  |
| <b>Mother's employment status</b>             |            |           |     |        |        |
| Housewife                                     | 186 (87.3) | 27 (12.7) | 213 |        |        |
| Working job                                   | 92 (98.9)  | 1 (1.1)   | 93  | 10.480 | ≤ 0.05 |
| <b>Father's occupation</b>                    |            |           |     |        |        |
| Manual worker                                 | 31 (91.2)  | 3 (8.8)   | 34  |        |        |
| Clerk/administrative                          | 85 (87.6)  | 12 (12.4) | 97  |        |        |
| Professional                                  | 118 (92.9) | 9 (7.1)   | 127 | 1.904  | 0.593  |
| Others                                        | 44 (91.7)  | 4 (8.3)   | 48  |        |        |
| <b>Total number of children in the family</b> |            |           |     |        |        |
| 1                                             | 81 (94.2)  | 5 (5.8)   | 86  |        |        |
| 2-3                                           | 134 (90.5) | 14 (9.5)  | 148 | 2.140  | 0.343  |
| More than 3                                   | 63 (87.5)  | 9 (12.5)  | 72  |        |        |
| <b>Family income in Qatari Riyals (QR)</b>    |            |           |     |        |        |
| Up to 10000 QR                                | 107 (82.9) | 22 (17.1) | 129 |        |        |
| 10001-20000 QR                                | 99 (95.2)  | 5 (4.8)   | 104 | 17.369 | ≤ 0.05 |
| More than 20000 QR                            | 72 (98.6)  | 1 (1.4)   | 73  |        |        |

Table (3) shows several statistically significant relations between ID in infants and their feeding practice and iron supplementation.

**Table (3): Relation between ID and feeding practice**

| Characteristic                                                           | No ID (%)  | ID (%)    | Total | $\chi^2$ | p value |
|--------------------------------------------------------------------------|------------|-----------|-------|----------|---------|
| <b>Exclusive breastfeeding for 6 months</b>                              |            |           |       |          |         |
| Yes                                                                      | 51 (81.0)  | 12 (19.0) | 63    |          |         |
| No                                                                       | 208 (92.9) | 16 (7.1)  | 224   | 7.915    | 0.007   |
| <b>Frequency of breastfeeding</b>                                        |            |           |       |          |         |
| All or almost all feeds                                                  | 142 (86.1) | 23 (13.9) | 165   |          |         |
| About half of all feeds                                                  | 76 (93.8)  | 5 (6.2)   | 81    | 8.893    | 0.012   |
| Few feeds since was born                                                 | 41 (100.0) | 0 (0)     | 41    |          |         |
| <b>Continuation of breastfeeding at one year</b>                         |            |           |       |          |         |
| Yes                                                                      | 115 (82.7) | 24 (17.3) | 139   |          |         |
| No                                                                       | 144 (97.3) | 4 (2.7)   | 148   | 17.268   | ≤ 0.05  |
| <b>Breastfeeding intake within the last 24 hours</b>                     |            |           |       |          |         |
| Yes                                                                      | 112 (82.4) | 24 (17.6) | 136   |          |         |
| No                                                                       | 147 (97.4) | 4 (2.6)   | 151   | 18.281   | ≤ 0.05  |
| <b>Ever take infant formula milk (n= 306)</b>                            |            |           |       |          |         |
| Yes                                                                      | 225 (95.3) | 11 (4.7)  | 236   |          |         |
| Never                                                                    | 53 (75.7)  | 17 (24.3) | 70    | 25.011   | ≤ 0.05  |
| <b>Age at introducing of any solid, semi-solid or soft food (n= 306)</b> |            |           |       |          |         |

|                                                |            |          |     |       |       |
|------------------------------------------------|------------|----------|-----|-------|-------|
| Less than 6 months                             | 72 (91.1)  | 7 (8.9)  | 79  | 0.011 | 0.917 |
| 6 months or more                               | 206 (90.7) | 21(9.3)  | 227 |       |       |
| <b>Ever take iron supplementation (n= 306)</b> |            |          |     |       |       |
| Yes                                            | 27 (96.4)  | 1 (3.6)  | 28  | 1.154 | 0.283 |
| No                                             | 251 (90.3) | 27 (9.7) | 278 |       |       |

The differences in mean frequency of consumption for different groups of food is shown in **Table (4)**, where infants diagnosed with ID consumed less plant foods rich in iron, and the difference was statistically significant. However, the difference was not significant for animal sources of iron and the overall score of food frequency.

**Table (4): Relation between ID and food frequency score**

| Food item                    | Mean $\pm$ SD  |                 | Student's <i>t</i> test | <i>p</i> value |
|------------------------------|----------------|-----------------|-------------------------|----------------|
|                              | No ID          | ID              |                         |                |
| <b>Overall score</b>         | 21.2 $\pm$ 3.9 | 19.89 $\pm$ 4.0 | 1.64                    | 0.12           |
| <b>Animal Source of iron</b> | 7.9 $\pm$ 2.3  | 7.9 $\pm$ 2.2   | 0.02                    | 0.98           |
| <b>Plant source of iron</b>  | 13.2 $\pm$ 2.8 | 11.9 $\pm$ 2.7  | 2.26                    | <b>0.03</b>    |

When the relation between ID and infant feeding counseling for mothers was assessed, there was a significant relationship between receiving counseling and ID occurrence, as the prevalence of ID was higher among infants to mothers didn't receive feeding counseling compared to infants of mothers received such counseling (13.4 against 4.2%) respectively, with ( $\chi^2= 7.731$  and  $p= 0.005$ ).

From the BMI for age based on z-score, ID prevalence was variable among different BMI groups.[35, 36] It was as high as 16.7%among wasted/severely wasted infants, 9.7% among infants at risk of overweight, 9.4% among infants with normal BMI and as low as 5.6% among the overweight/obese group of infants. These relationships were not statistically significant ( $\chi^2= 1.007$  and  $p= 0.799$ ).

## Discussion

This is the first population-based descriptive epidemiological study to estimate the prevalence and associated factors of ID and IDA in infants in Qatar. We found a prevalence of anemia, ID and IDA among infants of 23.5%, 9.2% and 7.8% respectively, which is much lower than the published global prevalence.[37]

Comparing these findings with figures published for other countries of the EMR, it appears that many of them have an even higher burden of disease. The WHO report, 2013 also showed no improvement in the overall anemia situation among pre-schoolers where 63% of children under the age of 5 years had

1  
2  
3 IDA.[16, 38] The prevalence of anemia, ID and IDA in our study was also lower than in the United Arab  
4 Emirates, Kuwait and Saudi Arabia.[29, 39, 40] A study conducted in Raparin teaching hospital for  
5 children in Erbil - Iraq, 2007, among infants aged (12 - 24) months, showed that the prevalence of ID  
6 ranged between 51.9% and 48.1%. It also showed that about 53% and 30 % of participants had anemia  
7 and IDA respectively.[41]

8  
9 Qatar has implemented a well-developed and comprehensive well baby program at PHC centers. In a  
10 study undertaken in 2011 at Ain Shams University Children's Hospital in Egypt which included three  
11 hundred poor Egyptian infants, anemia was diagnosed in 66% of the participants aged between 6 and 24  
12 months, and among them, 43% had IDA.[42] This high prevalence rate may be due to the selection of a  
13 high-risk group for the study. Similar results were also seen in Kassala (Eastern Sudan) where up to 86%  
14 of young children less than three years of age living were diagnosed with IDA.[43]

15  
16  
17  
18 On the other hand, the prevalence of anemia, ID and IDA found in this study is still high compared to  
19 many developed countries. Male *C et al*, 2001 showed that the prevalence of anemia, ID and IDA was  
20 9.4%, 7.2% and 2.3% respectively.[24] The difference in prevalence compared to this study may be  
21 attributed to the cut-off point of SF, the eligibility criteria and/or the disease determinants between the  
22 two populations. A study from Estonia undertaken between July 2002 to March 2005 of 171 infants aged  
23 9 to 12 months, found a prevalence of ID and IDA of 14.0% and 9.4, % respectively. The study utilized a  
24 cut-off value for Hb of <10.5 g/dl and for serum ferritin of <12 µg/L.[28]

25  
26  
27  
28 In relation to the potential determinants of ID in this study, gender did not appear to be a factor as  
29 there was no statistically significant difference between male and female participants. This is consistent  
30 with Vendt *et al*,2007.[28] However , in a study from Iran, of 33 cases diagnosed with IDA, 26 children  
31 (78.8%) were males and the prevalence of IDA was statistically significant among male compared with  
32 female infants ( $p = 0.015$ ).[44] Another study of 201 infants in Iran showed a prevalence of IDA of  
33 61.5% among male infants. Employing a multiple logistic regression model, the researchers reported that  
34 male gender was the most important ID risk factor in their study (OR = 3.3; 95% CI 1.7-6.3; and  
35  $p < 0.001$ ).[45]

36  
37  
38  
39 In this study, we found a statistically significant higher prevalence of ID among non-Qatari infants  
40 compared to their Qatari counterparts. This difference can be attributed to possible difference in  
41 economic, social and/or nutritional attributes. ID was more common among those infants born pre-term  
42 compared to infants born full term. However, this result is not statistically significant. In other studies  
43 from Canada, prematurity and intra-uterine growth retardation were shown to be risk factors for ID and  
44 IDA associated with low hepatic and bone marrow iron stores at birth.[18] A clinical report from the  
45 American Academy of Pediatrics indicated that the deficit of total body iron in preterm infants increases  
46 with decreasing gestational age, is worsened by the rapid postnatal growth that many infants experience  
47 and by frequent phlebotomies without adequate blood replacement. All these are risk factors for ID. [3]

48  
49  
50  
51 Infants with low birth weight were shown to be more prone to ID compared to those born with normal  
52 weight. This finding is similar to a study conducted in Estonia where the mean birth weight among the  
53 iron deficient group was significantly lower than that in the control group. [28]

54  
55 Concerning the infant's mode of delivery in this study, those infants born through caesarean section  
56 showed higher risk of iron deficiency than those born through normal delivery. This finding is consistent

1  
2  
3 with results of a systematic review and meta-analysis which synthesized evidence that compared with  
4 vaginal delivery, caesarean section is associated with reduced placental transfusion and poor iron-related  
5 hematologic indices in both cord and peripheral blood. This in turn indicates that neonates delivered by  
6 caesarean section might be more likely to develop iron deficiency anemia later in infancy compared to  
7 their normally delivered counterparts.[30]  
8  
9

10 In this study, ID was more common among infants born to younger mothers aged 25 years or less  
11 (11.3%) compared to among infants of mothers aged 26 - 35 years (8.1%) and for infants of mothers aged  
12 more than 35 years (10.9%). Similarly an exploratory descriptive study conducted in Egypt with 400  
13 healthy children aged 12 to 24 months reported that iron deficiency was more prevalent among infants of  
14 mothers aged 20-29 years old (67.2%) compared with infants of mothers aged more than 30 years  
15 (22.4%) and infants of mothers aged less than 20 years old (10.4%).[46] An explanation for this may be  
16 related to the lack of infant feeding experience of young mothers . We found that ID was more common  
17 among infants born to illiterate mothers compared to mothers with higher education. However, the  
18 findings were not statistically significant. Similarly, the relationship with parental education was not  
19 statistically significant. Our findings are similar to a study which showed a statistically significant  
20 difference between IDA among children below the age of two years and the level of parental education. In  
21 that study, the highest percentage of anemia cases (32.1%) were found in infants of illiterate mothers  
22 ( $X^2=21.775$  and  $p = 0.0001$ ).[46]  
23  
24  
25  
26

27 On the contrary, a study from Iran reported that educational level of the mother did not have an effect  
28 on the iron status of infants. [44] Our study also showed that ID was more prevalent among infants born  
29 to mothers who were housewives compared to those born to working mothers, and the relationship was  
30 statistically significant. This finding is consistent with the results of a study conducted in Alexandria,  
31 Egypt, where 88.4% of infants born to non-working mothers had IDA compared to only 15.4% of those  
32 born to working mothers.[46] The difference could be explained by possible higher education and  
33 knowledge among working mothers compared to housewives, and thus better feeding practices and/or that  
34 working mothers are more reliant on formula feeding and breastfeed less compared to their housewife  
35 counterparts.  
36  
37  
38

39 Prevalence of IDA in infants from families with more than three children was high compared to those  
40 infants born to families with 2-3 children and to families with only one child. This corroborates a study  
41 undertaken in Iraq where low serum iron was found in children from families which had 4 children or  
42 more compared to families that had less than 4 children.[41] However, a study conducted in Iran in 2007  
43 reported no significant difference between IDA prevalence and the total number of children in the  
44 infant's family ( $P > 0.05$ ).[44]  
45  
46

47 The relationship between ID and history of exclusive breastfeeding for six months, frequency of  
48 breastfeeding, continued breastfeeding at one year and intake of breast milk within 24 hours prior to the  
49 interview were statistically significant in this study. Similar results were found in a study from Estonia in  
50 which infants exclusively breastfed until the age of 6 months had significantly lower Hb and ferritin  
51 levels compared to those exclusive breastfed only until the age of 3 months.[28] Other studies have  
52 reported prevalence rates of IDA of 27% in infants exclusively breastfed up to 6 months, 16.7% in infants  
53 fed with formula milk and 100% in infants fed with cow's milk ( $p=0.033$ ).[44] The figures appear to  
54  
55  
56  
57



1  
2  
3 reflect the iron content of different types of milk with levels higher in formula milk (fortified with iron)  
4 and relatively low in breast milk and fresh cow's milk. Prolonged exclusive breastfeeding has been  
5 suggested to decrease the intake of dietary iron, which in turn leads to iron deficiency especially in  
6 growing infants beyond the age of 6 months when the needs for iron may not be adequately met by  
7 continuation of exclusive breastfeeding.[18-22] In South Korea a study of 87 healthy full-term infants  
8 showed that at 6 months of age, the incidences of ID and IDA in breast-fed only infants were 33% and  
9 30%, respectively, significantly higher than formula fed (8% and 5%, respectively) and those breast-fed  
10 with iron supplementation (7% and 5%, respectively). At 12 months of age, the incidences of ID and IDA  
11 in breastfed were 64% and 50%, respectively, again significantly higher than the other groups. [23] The  
12 established reason is the beneficiary influence of the iron fortifying formula milks on the infants' stores of  
13 iron as demonstrated in many studies.[18,47]  
14  
15  
16  
17

18 In the current study, mothers were asked about frequency of consumption of different food items rich  
19 in iron, which was used to calculate the food frequency score derived from a previous study conducted in  
20 Qatar.[48] The findings showed that infants who suffered ID consumed less plants rich in iron compared  
21 to their counterparts without ID, and the difference was statistically significant ( $t$  test= 2.26 and  $p$ = 0.03).  
22 No significant differences were found when studying animal sources of iron and the overall score of food  
23 frequency. This finding supports mentioned previous Qatari study in which ID was more common among  
24 pregnant women with high consumption of food items containing iron of plant sources ( $t$  test= 0.2 and  $p$ =  
25 0.834) compared to food items containing iron of animal sources ( $t$  test= 1.6 and  $p$ = 0.100). They related  
26 this to less bio-available iron in food items of plant origin compared to animal origin.  
27  
28  
29

30 Our finding of higher prevalence of ID among infants who started solid, semi-solid or soft food at age  
31 of 6 months or later compared to those who started before the age of 6 months is similar to the results of  
32 other studies where infants fed with solid food before 6 months had statistically higher Hb values than  
33 those who were introduced to solid food after 6 months of life.[25,28,47]  
34  
35

36 Infants on iron supplementation were less likely to be iron deficient in this study. This finding  
37 supported by a study where infants with iron supplementation had higher Hb concentration and higher  
38 MCV.[3] In another study conducted on 126 infants divided into 3 groups, where 86 cases received iron  
39 supplementation irregularly, 27 cases regularly and 13 cases never received iron, IDA in the first group  
40 was 26.7%, 3.7% in the second group and 69.2% in the third group who never received any iron  
41 supplementation. The relationship between IDA and no iron supplementation was statistically significant  
42 ( $p$ < 0.001).[44] Similarly, significantly lower ferritin concentrations in 6-month-old infants have been  
43 reported in infants who were exclusively breastfed compared to infants who were breastfed and took iron  
44 supplementation.[18]  
45  
46  
47

48 We found a significant relationship between maternal infant feeding counseling and prevalence of ID.  
49 In a previous US study, ID prevalence decreased among African American children aged 1-3 years old,  
50 from 16% to 6% between years 1976 and 2002. This marked decline was attributed to implementation of  
51 the Women, Infants and Children Program which targeted specific groups of mothers and families with  
52 counseling, and this led to improvement in infant feeding practices to prevent ID.[46]  
53  
54  
55  
56  
57  
58  
59  
60

Our finding of higher ID prevalence among infants born to mothers with a history of having four pregnancies (9.9%) or more, compared to infants born to mothers with less than four pregnancies (8.8%) may be attributed to the possible depletion of the mother's body stores of iron, especially with multiple tightly close pregnancies.,[18,44]

Iron deficiency prevalence was variable among different infant BMI groups. These relations were statistically insignificant. On the other hand, a study conducted in the US indicated that overweight children (1-3 years old) had triple the odds of ID prevalence compared with normal weight or underweight children and ID prevalence remained consistently high for overweight children at 20% to 24%.[49] A second study from the US showed that ID prevalence was 20% among those with overweight, 8% for those at risk for overweight, and 7% for normal-weight toddlers (1-3 years old).[50] The possible explanation to this contradiction with the results seen in the two US studies is that, anemia, ID and IDA are mostly related to the imbalance between iron needs and dietary sources of iron, rather than the relation with the caloric content of infant's nutrition or body composition. In this study, we had a very small insignificant number of participating infants who were wasted or severely wasted.

## Conclusion

Although ID and IDA among infants in the State of Qatar are less prevalent compared to several developing countries including those in the EMR, they are still relatively higher than rates seen in the developed ones. The prevalence of anemia in this study was 23.5%, ID was 9.2% and IDA was 7.8%. ID was significantly associated with non-Qatari infants, those whose mothers were un-employed or belonged to a family with low total monthly income. Infants exclusively breastfed for 6 months, breastfed more frequently, and those who continued breastfeeding at the age of one year, or who never took infant formula milk were also at higher risk. Furthermore, those who frequently consumed plant sources of dietary iron and had a mother that did not receive infant feeding counseling were at greater risk of ID and IDA.

We believe that these findings are worth further exploration and that they fill gaps in our current knowledge and can help us to plan public health interventions at national as well as regional level in the Gulf Cooperation Council (GCC) countries.

## Recommendations

Integration of mass ID and IDA screening prior to 12 months visit to allow for early intervention in addition to proper counseling regarding breast feeding and proper weaning practice.

## Acknowledgments

We are extremely grateful to all the mothers who took part in this study, the staff of the WBCs, data collectors and Dr. Rajvir Singh for his invaluable statistical assistance, support and guidance.

## Ethical approval

Appropriate approvals obtained from the Arab Board of Medical Specialization, Institutional Review Board of HMC and the PHCC Research Committee.

### Funding

The funding of this study is received from the Research Center at HMC, state of Qatar.

### Patient consent

Mothers of participants were consented in written after appropriate description of the study aim and value.

### Competing interest

None declared.

### Figure legends

**Figure (1):** Among the three hundred and six infants of completed 12 months of age and lesser than 13 months; 72 (23.5%) had anemia which defined as hemoglobin <11.1 g/dl (normal reference range is 11.1-14.1 g/dl), 28 (9.2%) had iron deficiency (ID) which defined as Serum Ferritin (SF) below normal reference range (6-24 ug/L) in absence of high C-Reactive Protein (CRP), and 24 (7.8%) had iron deficiency anemia (IDA) which defined by combination of three elements - hemoglobin <11.1 g/dl (normal reference range is 11.1-14.1 g/dl), low SF (<6 mcg/L) and absence of high CRP (reference level is normally less than 5 mg/L).

### Data sharing statement

No additional data are available.

### Contribution to authorship

AJZ, NAS and SAK designed the study and wrote the primary proposal. AJZ and SAK managed data collection and fieldwork. SRO and AJZ did literature review, data analysis, results interpretation and wrote the discussion. AJZ, SRO and NAS drafted and revised the manuscript. AJZ finalized and submitted the manuscript.

### References

1. Worldwide prevalence of anaemia, WHO Vitamin and Mineral Nutrition Information System, 1993–2005. WHO press 2008. Available from: <http://www.who.int/nutrition/publications/micronutrients/PHNmay2008.pdf> (accessed 20 May 2014)
2. Zetterström R, Iron deficiency and iron deficiency anaemia during infancy and childhood. *Acta Paediatr* 2004;93(4):436-9.

3. Robert D, Baker MD, Frank R, et al. Clinical Report: Diagnosis and Prevention of Iron Deficiency and Iron-Deficiency Anemia in Infants and Young Children (0 –3 Years of Age). *AAP*2010;126:1040-50.
4. Halterman JS, Kaczorowski JM, Aligne CA, et al. Iron deficiency and cognitive achievement among school-aged children and adolescents in the United States. *Pediatrics* 2001;107:138-386.
5. Szajewska H, Rusczyński M, Chmielewska A. Effects of iron supplementation in non-anemic pregnant women, infants, and young children on the mental performance and psychomotor development of children: a systematic review of randomized controlled trials. *Am J Clin Nutr* 2010;91:1684-90.
6. Anaemia. WHO. 2013. [www.who.int/topics/anaemia/en/](http://www.who.int/topics/anaemia/en/)(accessed 22 May 2014)
7. Micronutrient deficiencies. WHO. 2013. [www.who.int/nutrition/topics/ida/en/index.html](http://www.who.int/nutrition/topics/ida/en/index.html) (accessed 18 Jun 2014)
8. World Health Organization. Malnutrition: the global picture. Geneva: The Organization; 2000.
9. Yip R. The challenge of improving iron nutrition: limitations and potentials of major intervention approaches. *Eur J Clin Nutr*1997;51:516-24.
10. Lawson MS, Thomas M, Hardiman A. Iron status of Asian children aged 2 years living in England. *Arch Dis Child* 1998;78:420-26.
11. Karr MA, Mira M, Alperstein G, Labib S, Webster BH, Lammi AT et al. Iron deficiency in Australian-born children of Arabic background in central Sydney. *Med J Aust* 2001;174:165-8.
12. Booth IW, Aukett MA. Iron deficiency anaemia in infancy and early childhood. *Arch Dis Child* 1997;76:549-54.
13. Anemia prevention and control. WHO; 2013. Available from:[http://www.who.int/medical\\_devices/initiatives/anaemia\\_control/en/index.html](http://www.who.int/medical_devices/initiatives/anaemia_control/en/index.html) (accessed 26 May 2014)
14. Stoltzfus RJ. Iron deficiency: global prevalence and consequences. *Food Nutr Bull* 2003 Dec;24(4):S99-103.
15. Mirmiran P, Golzarand M, Serra-Majem L, et al. Iron, Iodine and Vitamin A in the Middle East; A Systematic Review of Deficiency and Food Fortification. *Iranian J Publ Health*. 2012;41(8):8-19.
16. Anaemia. WHO; 2013. [www.emro.who.int/healthtopics/anaemia/index.html](http://www.emro.who.int/healthtopics/anaemia/index.html) (accessed Jun 2014)
17. Dallman PR. Changing iron needs from birth through adolescence. 39. Dallman PR. Changing iron needs from birth through adolescence. In: Fomon SJ, Zlotkin SH, editors. Nutritional anemias. Nestle Nutrition Workshop Series. New York: *Vevey/Raven Press*; 1992:29-38. [www.nestlenutrition-institute.org/docs/default-source/global-dcoument-library/publications/secured/7fe7d3964ce56230a9d3622ffb3a44a5.pdf?sfvrsn=0](http://www.nestlenutrition-institute.org/docs/default-source/global-dcoument-library/publications/secured/7fe7d3964ce56230a9d3622ffb3a44a5.pdf?sfvrsn=0) (accessed 12 Jun 2014)
18. Zlotkin S. Clinical nutrition: 8. The role of nutrition in the prevention of iron deficiency anemia in infants, children and adolescents. *CMAJ*. 2003;168(1):59-63.
19. Dallman PR. Nutritional anemias in childhood: iron, folate and vitamin B12. In: Suskind RM, LewinterSuskind L, eds. Textbook of Pediatric Nutrition. 2nd ed. New York: *Raven Press*; 1993:91–105.
20. Aggett, P. Iron for the suckling. Iron nutrition in childhood. *Acta Paediatr Scand* 1989;78(361):96–102.
21. Kim HJ, Kim DH, Lee EJ, et al. Is It Possible to Predict the Iron Status from an Infant's Diet History?. *Pediatr Gastroenterol Hepatol Nutr* 2013;16(2):95-103.
22. Infant young child feeding counselling: An integrated course. Geneva, Switzerland. WHO. 2006. [whqlibdoc.who.int/publications/2006/9789241594769\\_eng.pdf](http://whqlibdoc.who.int/publications/2006/9789241594769_eng.pdf) (accessed 16 Oct 2014)
23. Noh SJ, Na B, Kim MJ. Iron deficiency and early, low-dose iron supplementation in breastfed infants. *Korean J Pediatr Gastroenterol Nutr* 2008 Sep;11(2):169-78.

24. Male C, Persson LA, Freeman V, et al. Prevalence of iron deficiency in 12-mo-old infants from 11 European areas and influence of dietary factors on iron status (Euro-Growth study). *Acta Paediatr* 2001 May;90(5):492-8.
25. Chang JH, Cheong WS, Jun YH, et al. Weaning food practice in children with iron deficiency anemia. *Korean J Pediatr* 2009 Feb;52(2):159-66.
26. Global Strategy for Infant and Young Child Feeding, 2013. WHO. [www.who.int/nutrition/topics/global\\_strategy/en/index.html](http://www.who.int/nutrition/topics/global_strategy/en/index.html) (accessed 16 Oct 2014)
27. Infant and young children feeding, a tool for assessing national practices, policies and programmes. WHO publications. [http://www.who.int/nutrition/publications/inf\\_assess\\_nnpp\\_ref\\_eng.pdf](http://www.who.int/nutrition/publications/inf_assess_nnpp_ref_eng.pdf)
28. Vendt N, Grünberg H, Leedo S, et al. Prevalence and causes of iron deficiency anemias in infants aged 9 to 12 months in Estonia. *NCBI* 2007;43(12):947-52.
29. Miller CJ, Dunn EV, Abdouni SF, et al. Factors associated with iron depletion and iron deficiency anemia among Arabic preschool children of the United Arab Emirates. *Saudi Med J* 2004 Jul;25(7):843-7.
30. Zhou YB, Li HT, Zhu LP, Liu JM. Impact of cesarean section on placental transfusion and iron-related hematological indices in term neonates: a systematic review and meta-analysis. *Epub* 2014;35(1):1-8.
31. Eden AN, Sandoval C. Iron deficiency in infants and toddlers in the United States. *Pediatr Hematol Oncol* 2012;29:704-9.
32. Altuntas N, Beken S, Kulali F, et al. Prevalence of iron deficiency at the first age of the infants hospitalized in neonatal period. *Transfus Apher Sci* 2012;47:85-9.
33. Iron Deficiency Anaemia Assessment, Prevention and Control: A guide for programme manager. WHO press 2001; WHO/NHD/01.3. [www.who.int/nutrition/publications/micronutrients/anaemia\\_iron\\_deficiency/WHO\\_NHD\\_01.3/en/](http://www.who.int/nutrition/publications/micronutrients/anaemia_iron_deficiency/WHO_NHD_01.3/en/) (accessed 16 Oct 2014)
34. PHCC. Well baby clinic protocol. Doha, Qatar: PHCC; 2011.
35. World Health Organization. WHO Child Growth Standards: Methods and development. Geneva: World Health Organization, 2006. Available from: [http://www.who.int/childgrowth/standards/Technical\\_report.pdf?ua=1](http://www.who.int/childgrowth/standards/Technical_report.pdf?ua=1) (accessed 15 Jun 2014)
36. World Health Organization. Training Course on Child Growth Assessment. Geneva, WHO, 2008. Available from: [http://www.who.int/childgrowth/training/module\\_c\\_interpreting\\_indicators.pdf](http://www.who.int/childgrowth/training/module_c_interpreting_indicators.pdf) (accessed 15 Jun 2014)
37. Stevens GA, Finucane MM, De-Regil LM, et al. Global, regional, and national trends in haemoglobin concentration and prevalence of total and severe anaemia in children and pregnant and non-pregnant women for 1995–2011: a systematic analysis of population-representative data. *Lancet Glob Health* 2013 Jul;1(1):e16-e25.
38. Bagchi K. Nutrition in the Eastern Mediterranean Region of the World Health Organization. *EMHJ* 2008;14:S107-S113.
39. Babiker MA, Bahakim HM, al-Omair AO, et al. Prevalence of iron deficiency in Saudi children from birth to 15 months of age. *Ann Trop Paediatr* 1989;9:111-4.
40. Assiri F, Al-Sumaie M, Safar F, et al. Prevalence and associated factors of iron deficiency anemia among Kuwaiti children. *Bull Alex Fac Med* 2006;42(2).
41. Alkhateeb N. Risk factors associated with iron deficiency among children admitted to paediatric emergency unit in Erbil, Iraq. *Zanco J Med Sci* 2010;14(3):1-8.
42. Elalfy MS, Hamdy AM, Maksoud SS, et al. Pattern of milk feeding and family size as risk factors for iron deficiency anemia among poor Egyptian infants 6 to 24 months old. *Nutr Res* 2012;32(2):93-9.
43. Mahmoud H, Muddathir A, Osman S, et al. Iron deficiency anemia among children under three years in Kassala, Eastern Sudan. *Sudanese journal of public health* 2014;9:33-7.

- 1  
2  
3 44. Monajemzadeh SM, Zarkesh MR. Iron deficiency anemia in infants aged 12-15 months in Ahwaz,  
4 Iran. *Indian J PatholMicrobiol* 2009;52:182-4.  
5 45. Antunes H, Santos C, Carvalho S, et al. male gender is an important clinical risk factor for iron  
6 deficiency in healthy infants. *Clinical Nutrition ESPEN* 2012;7(6):e219-e222.  
7 46. Mohamed A, abo-donia A. Contributing factors of iron deficiency anemia among children under two  
8 years attending family health centers in Alexandria. *Life Science Journal* 2011;8(4):996-1007.  
9 47. Shaw V, McCrann U. Infant feeding: weaning. London, UK: Great Ormond Street Hospital; 2012.  
10 www.gosh.nhs.uk/health-professionals/clinicalguidelines/infant-feeding-eaning/#Rationale (accessed  
11 17 Oct 2014)  
12 48. Al-Mass M, Selim NA, Al-Kuwari M, Ismail MS. Assessment of Anemia, IDA and ID among  
13 Pregnants in Qatar: Cross Sectional Survey. *SM J Public Health Epidemiol* 2016; 2(3): 1035.  
14 49. Brotanek JM, Gosz J, Weitzman M, et al. Secular trends in the prevalence of iron deficiency among  
15 US toddlers, 1976-2002. *Arch PediatrAdolesc Med* 2008 Apr;162(4):374-81.  
16 50. Brotanek JM, Gosz J, Weitzman M, Flores G. Iron deficiency in early childhood in the United States:  
17 risk factors and racial/ethnic disparities. *Pediatrics* 2007 Sep;120(3):568-75.  
18  
19  
20  
21  
22  
23  
24  
25  
26  
27  
28  
29  
30  
31  
32  
33  
34  
35  
36  
37  
38  
39  
40  
41  
42  
43  
44  
45  
46  
47  
48  
49  
50  
51  
52  
53  
54  
55  
56  
57  
58  
59  
60



1  
2  
3  
4  
5  
6  
7  
8  
9  
10  
11  
12  
13  
14  
15  
16  
17  
18  
19  
20  
21  
22  
23  
24  
25  
26  
27  
28  
29  
30  
31  
32  
33  
34  
35  
36  
37  
38  
39  
40  
41  
42  
43  
44  
45  
46  
47  
48  
49  
50  
51  
52  
53  
54  
55  
56  
57  
58  
59  
60



Figure (1): Distribution of study infants according to their anemia, iron deficiency and iron deficiency anemia status

81x60mm (300 x 300 DPI)

Only

## STROBE Statement checklist

| Item                      | Item number | Status   | Page number |
|---------------------------|-------------|----------|-------------|
| <b>Title and abstract</b> | 1           | Included | 1, 2        |
| <b>Introduction</b>       |             |          |             |
| Background/rationale      | 2           | Included | 2, 3, 4     |
| Objectives                | 3           | Included | 4           |
| <b>Methods</b>            |             |          |             |
| Study design              | 4           | Included | 4           |
| Setting                   | 5           | Included | 4           |
| Participants              | 6           | Included | 4           |
| Variables                 | 7           | Included | 4, 5        |
| Data sources/ measurement | 8           | Included | 5           |
| Bias                      | 9           | Included | 2           |
| Study size                | 10          | Included | 4           |
| Quantitative variables    | 11          | Included | 4           |
| Statistical methods       | 12          | Included | 5           |
| <b>Results</b>            |             |          |             |
| Participants              | 13          | Included | 5           |
| Descriptive data          | 14          | Included | 6 - 8       |
| Outcome data              | 15          | Included | 5 - 8       |
| Main results              | 16          | Included | 5 - 8       |
| Other analyses            | 17          | -        | -           |
| <b>Discussion</b>         |             |          |             |
| Key results               | 18          | Included | 8 - 12      |
| Limitations               | 19          | Included | 2           |
| Interpretation            | 20          | Included | 12          |
| Generalizability          | 21          | Included | 4, 12       |
| <b>Other information</b>  |             |          |             |
| Funding                   | 22          | Included | 12          |

# BMJ Open

## Iron deficiency, its epidemiological features and feeding practices among infants aged 12 months in Qatar, a cross-sectional study

|                                 |                                                                                                                                                                                                                                                                                                                                                                                                                                        |
|---------------------------------|----------------------------------------------------------------------------------------------------------------------------------------------------------------------------------------------------------------------------------------------------------------------------------------------------------------------------------------------------------------------------------------------------------------------------------------|
| Journal:                        | <i>BMJ Open</i>                                                                                                                                                                                                                                                                                                                                                                                                                        |
| Manuscript ID                   | bmjopen-2017-020271.R3                                                                                                                                                                                                                                                                                                                                                                                                                 |
| Article Type:                   | Research                                                                                                                                                                                                                                                                                                                                                                                                                               |
| Date Submitted by the Author:   | 08-Mar-2018                                                                                                                                                                                                                                                                                                                                                                                                                            |
| Complete List of Authors:       | Zainel, A.Jaleel; Primary Health Care Corporation, Clinical Affairs<br>Osman, Sherif ; Alexandria University High Institute of Public Health;<br>Primary Health Care Corporation, Family and Community Medicine<br>Al-Kohji, Sadriya; Primary Health Care Corporation, Service Development<br>Selim, Nagah; Cairo University, Public Health and Preventive Medicine;<br>Primary Health Care Corporation, Family and Community Medicine |
| <b>Primary Subject Heading</b>: | Epidemiology                                                                                                                                                                                                                                                                                                                                                                                                                           |
| Secondary Subject Heading:      | Public health                                                                                                                                                                                                                                                                                                                                                                                                                          |
| Keywords:                       | iron deficiency, feeding, infants, Qatar                                                                                                                                                                                                                                                                                                                                                                                               |
|                                 |                                                                                                                                                                                                                                                                                                                                                                                                                                        |

SCHOLARONE™  
Manuscripts

1  
2  
3 **Iron deficiency, its epidemiological features and feeding practices among infants aged 12**  
4 **months in Qatar, a cross-sectional study**  
5  
6  
7

8 **Corresponding author and PI:**  
9

10 **Dr. Abdul Jaleel Zainel** MBBch, ABCM

11 Community Medicine Specialist, Primary Health Care Corporation, Doha, Qatar

12 E-mail: azainel@phcc.gov.qa

13 P.O. Box 55772, Doha, Qatar

14 Cell phone: + (974) 55087676

15  
16  
17  
18  
19 **CO-PIs:**  
20

21 **Dr. Sherif R. Omar** MBBch, DPH, DM, FRCP, DTM&H, Dr PH

22 Associate Professor of Public and Tropical Health, High Institute of Public Health, University of  
23 Alexandria, Egypt / Community Medicine Consultant, Primary Health Care Corporation, Doha, Qatar

24 E-mail: shosman@phcc.gov.qa / sherif\_omar67@yahoo.com

25 Office phone: + (974) 4407 0371, Cell phone: + (974) 33751401

26  
27  
28  
29  
30 **Dr. Sadriya Al Kohji** MBBch, ABCM

31 Community Medicine Consultant, Primary Health Care Corporation, Doha, Qatar

32 E-mail: salkohji@phcc.gov.qa

33 Cell phone: + (974) 55812292

34  
35  
36  
37 **Dr. Nagah A. Selim** MBBch, MPH, PhD

38 A / Professor of Public Health and Preventive Medicine, Cairo University, Egypt /Associate Program  
39 Director, Community Medicine Residency Program, Primary Health Care Corporation, Doha, Qatar

40 E-mail: nselim@phcc.gov.qa

41 Office phone: + (974) 4407 0341, Cell phone: + (974) 66083921

42  
43  
44  
45  
46  
47 **WORD COUNT**

48 5088 words  
49  
50  
51  
52  
53  
54  
55  
56  
57  
58  
59  
60

## Abstract

**Objectives** To estimate the magnitude of anemia, iron deficiency (ID), iron deficiency anemia (IDA) and to explore epidemiological features of ID and feeding practices among infants aged 12 months in Qatar.

**Setting** Well baby clinics in 14 randomly selected primary health care centers covering all geographical areas on the national level.

**Participants** Three hundred and six (163 male and 143 female) infants of all nationalities were enrolled. Mothers were asked to complete a predesigned interview questionnaire and infants were blood tested for anemia, ID and IDA.

**Outcome measures** Cutoff point used to diagnose anemia was hemoglobin (Hb) <11.1g/dl, and to diagnose ID, serum ferritin (SF) <6 ug/l with normal C-reactive protein (CRP).

**Results** Prevalence of anemia was 23.5%, ID was 9.2% and IDA was 7.8%. ID was more prevalent among non-Qatari infants compared to Qatari (10.9% vs. 1.7%,  $p=0.029$ ), more prevalent among infants born to housewives and to families of low income ( $p\leq 0.05$ ). With regard to feeding practice, ID was higher in infants who continued breastfeeding until the age of one year and among those who never took infant formula milk ( $p\leq 0.05$ ). Mothers who received infant feeding counseling had less ID occurrence among their infants compared to their counterparts who did not receive such counseling (4.2% vs. 13.4%,  $p=0.005$ ).

**Conclusion:** Although ID and IDA among infants in Qatar are less prevalent compared with many developing countries, still further efforts are needed for improvement towards more developed countries. Efforts should be contextualized and target the key epidemiological features with special emphasis on infant feeding and infant feeding counselling to mothers.

**Key words:** Iron, Anemia, Prevalence, feeding, 12 months infants, Qatar

### Strengths and limitations of this Study

- The first population-based study about ID and IDA among infants in Qatar.
- Covering a critical age of infancy (12 months) where feeding and weaning practices can influence the health and wellbeing of the child.
- Being a cross-sectional study where temporality cannot be demonstrated.
- A prospective study design would have overcome potential recall bias; however, it was not feasible to undertake one at the time due to shortage of resources.
- Differences in the applied diagnostic criteria and laboratory cutoff values in identification of anemia, ID and IDA across different studies limit the ability of a precise comparison.

### Introduction

Infants and young children are vulnerable to anemia especially iron deficiency anemia (IDA), which represents a public health problem with defined impacts on the health of communities.[1] Published evidence suggests that early infant feeding practices play a major role in the prevalence of iron deficiency (ID) and IDA.[2,3] Anemia early in life, with or without iron depletion, is known to seriously affect children's general health and immunity, retarding their growth and development by causing multiple disorders and abnormalities in different body systems.[3-5]

1  
2  
3 Anemia may be defined as hemoglobin (Hb) concentration 2 standard deviations (SD) below the  
4 mean Hb concentration for a normal population of the same gender and age range. ID, the commonest  
5 cause of anemia, is characterized by a depletion of iron in various body compartments and / or tissues.  
6 IDA is said to exist when ID is severe enough to significantly affect erythropoiesis.[3,6] IDA is a  
7 preventable and a treatable condition, therefore, early diagnosis represents the cornerstone in protection  
8 from its adverse consequences and combating its contributing factors.  
9  
10

11 Globally, ID is the most common and widespread nutritional disorder affecting all age groups,  
12 particularly children in developing countries where prevalence as high as 50% have been reported among  
13 infants aged 12 months in some countries. IDA is a leading cause of mortality and morbidity among  
14 infants worldwide and some of its manifestations are possibly irreversible.[7-14] In a systematic review  
15 done in 2012 to evaluate micronutrient deficiencies and food fortification in the Middle East, ID  
16 represented one of the three commonest micronutrient deficiencies in the region in addition to iodine and  
17 vitamin A.[15] According to the World Health Organization (WHO) in 2013, 63% of children under-5 in  
18 the Eastern Mediterranean Region (EMR) had IDA and in some studies, anemia among preschool  
19 children showed similarly high rates.[16]  
20  
21

22 Iron transfer from mother to fetus occurs mainly during the third trimester of pregnancy and is stored  
23 mainly in the liver and bone marrow. Thus, the amount of iron present at birth depends on the gestational  
24 age and weight of the baby.[17] Full term infants usually have sufficient iron stores until 4 to 6 months of  
25 age. During the infantile growth spurt, human milk (which contains 0.2–0.3 mg/L of iron) may not  
26 provide enough iron to meet high demands for rapid growth and erythropoiesis. Therefore, existing iron  
27 stores are mobilized to meet the iron requirements of the infant mostly around the age of 4-6 months. This  
28 may result in stores being generally depleted by the age of 6 months, yet from 4 to 12 months after birth,  
29 the infant's blood volume doubles, causing a 'physiologically dilution effect' for red blood cells and Hb.  
30 Thus at this age, dietary sources of iron become critical to keep up with the rapid rate of growth and red  
31 blood cell synthesis.[18-22]  
32  
33  
34

35 Studies have shown that increased nutritional requirements during the growth spurt, may often leads  
36 to a negative nutrient balance.[2] In general, prolonged exclusive breastfeeding (more than 6 months)  
37 predisposes to decreased dietary iron intake and may lead to iron depletion.[18,23] Male *et al.* in 2001  
38 indicated that feeding with iron-fortified formula positively influenced iron status among infants up to  
39 the age of 12 months. There was also a positive association with consumption of cereals and iron  
40 supplements.[24] Inadequate complementary feeding practices which represent an important risk factor  
41 for IDA are characterized by consumption of foods with low amounts of bio-available iron or foods  
42 with inhibitors to iron absorption. Such practices often extend up to the age of 2 years.[18,25]  
43  
44  
45

46 Infant feeding counseling offered to mothers and other caregivers on how to gradually  
47 increase consistency and quantity of foods also assists in prevention of micronutrient  
48 deficiency.[26,27] Preterm babies, as well as, those born small for gestational age, are particularly  
49 vulnerable to ID in their first months of life.[2,28,29] Infants delivered by cesarean section are more  
50 likely to get ID, as their delivery is associated with reduced placental transfusion and poor iron-related  
51 hematologic indices in both cord and peripheral blood.[30]  
52  
53

54 Prevention and control strategies against IDA are mainly dependent on the timing of diagnosis and  
55 start of treatment.[7] The WHO "Global Strategy for Infant and Young Child Feeding" was developed as  
56  
57



1  
2  
3 guidance to the prevention of micronutrient deficiencies including ID and IDA.[26] Many studies indicate  
4 that incidence of IDA has significantly decreased over time due to promotion of breastfeeding,  
5 improvement of overall nutritional status and use of iron-fortified baby foods.[31,32]  
6

7  
8 In Qatar, Well Baby Clinic (WBC) services provided at the primary health care (PHC) centers include  
9 routine screening of infants for anemia during their MMR vaccination visit at 12 months of age but  
10 routine screening for ID or IDA is not undertaken.[8] Previous studies in Qatar have focused on the extent  
11 of anemia but not specifically on ID or IDA in this age group. This study investigates the prevalence of  
12 ID and IDA and the correlates of ID among infants at 12 months of age, as well as infant and child  
13 feeding practices among mothers of all nationalities resident in Qatar. The current study provides a much  
14 needed first snapshot of the extend of problem in the State of Qatar.  
15

## 16 **Methods**

17  
18 A cross sectional study was conducted at WBCs in Primary Health Care Corporation (PHCC) centers.  
19 We recruited 350 infants whose mothers were interviewed using interview-administered questionnaires.  
20 The response rate was 87.4% as only 306 infants completed the study by undertaking the necessary  
21 laboratory tests. The WBCs provide comprehensive evidence-based services to all children under the age  
22 of 5 years. Of the 21 PHCC centers across Qatar operating at time of the study, 14 were providing the  
23 WBC service. Infants in the WBC appointment system who attended the selected centers seeking WBC  
24 services for the 12 month visit and met the eligibility were included in the study sample. Mothers of all  
25 participating infants signed an informed consent form.  
26  
27  
28

29  
30 **Eligibility criteria:** Male and female infants completed 12 months of age (but less than 13 months) and  
31 of all nationalities (Qatari and non-Qatari) attending WBCs at their routine 12 month's visit were eligible.  
32 Participants diagnosed with sickle cell anemia or thalassemia were excluded.  
33

34  
35 **Sample size calculation and sampling technique:** As ID prevalence in Qatar was not available; the  
36 latest published prevalence of ID in the nearest regional country (The United Arab Emirates) of 26 % was  
37 used to calculate the sample size.[29] It was estimated that a sample size of 292 is required for the study.  
38 To compensate for possible non-responders, an additional 20% were added bringing a total of 350 after  
39 rounding. A 95% confidence level and 5% error rate were used for the calculation. Data from the 12  
40 months vaccination coverage rates calculated by the PHCC in Qatar confirmed by its head of child health  
41 section shows a vaccination coverage rate of over 97% at this age, Therefore participants recruited are  
42 considered a representative sample of the national population. A systematic random sampling technique  
43 was used to recruit study participants. The sampling frame was drawn from the daily appointment list in  
44 WBCs. The first participant of the day was selected from the list and subsequent participants were  
45 selected randomly. The study took place in the period between September 2014 and May 2015.  
46  
47  
48

49  
50 **Study variables:** Dependent (outcome variables) measured included 'ID', defined as SF below normal  
51 reference range (6-24 ug/L) in the absence of high CRP.[3,33], and 'IDA' defined by a combination of  
52 three elements - Hb <11.1 g/dl (normal reference range is 11.1-14.1 g/dl), low SF (<6 mcg/L) and absence  
53 of high CRP (reference level is normally less than 5 mg/L).[3,6,33,34] Hb was determined using Sysmex  
54 500 I machines to determine the complete blood picture and count. Ferritin was determined using Cobas  
55 Integra 400 plus machine. The technique was particle enhanced immunoturbidimetric assay utilizing  
56  
57  
58

1  
2  
3 human ferritin agglutination with latex particles coated with anti-ferritin antibodies. The precipitate is  
4 determined turbidimetrically at 570/800 nm.

5 Independent (exposure) variables included socio-demographic characteristics of infants and their parents,  
6 birth history of the participant, history of maternal pregnancies, breastfeeding, intake of infant formula  
7 milk, iron supplementation, infant feeding counseling to mothers, body mass index (BMI) calculation,  
8 as well as, frequency of consumption of different food groups. Mothers were interviewed about frequency  
9 of infant's consumption of different food items rich in iron. Based on their responses, a food frequency  
10 score was calculated for each consumed food item according to the following criteria: A score of 1 for no  
11 previous consumption, 2 for 1-3 times/month, 3 for 1-6 times/week and 4 for daily consumption. Food  
12 items of animal origin were summed up as well as those of plant origin and the mean ( $\pm$ SD) was  
13 calculated for participants either with or without ID.  
14  
15  
16

17  
18 **Data collection tools:** The research team developed an interview-administered questionnaire after  
19 extensive literature review to establish content and face validity, followed by thorough discussion and  
20 assessment by experts in the fields of pediatric hematology and community medicine. A pilot was  
21 undertaken over 20 participants, conveniently sampled, to establish and confirm its suitability. Necessary  
22 adjustments were made accordingly. Anthropometric measurements of participants were acquired in order  
23 to calculate BMI. Laboratory results of participants were retrieved from their electronic medical record  
24 using a data extraction sheet. Venous blood samples are collected routinely by well baby clinics for all 12  
25 months aged infants as per their protocol to check for anemia. Additional laboratory studies for ID  
26 detection utilizing these samples were managed in hematology laboratory of the Qatar's secondary health  
27 care provider; Hamad Medical Corporation (HMC).  
28

29 To avoid measurement bias, all investigations were conducted in accredited laboratories which apply the  
30 Qatar national standards. To overcome selection bias, we strictly applied the exclusion criteria and  
31 recruited a representative sample. For consistency, where appropriate all measurements were repeated and  
32 the average of concordant readings recorded for the variables of concern. Although we intended to  
33 overcome all sources of bias, recall bias cannot be ruled out.  
34  
35  
36

37 **Data analysis:** Statistical Package for Social Sciences IBM-SPSS<sup>®</sup> version 20 was used for data entry and  
38 analysis. Descriptive analysis was undertaken (*frequency distribution tables, proportions, mean and*  
39 *standard deviation*), in addition to analytical statistics (*Chi-square test and fisher exact probability test*)  
40 were used to assess differences between two or more proportions and the *Student t test* was used to  
41 compare continuous variables. An *Alpha (p)* value of  $\leq 0.05$  was used as the cut-off level of significance.  
42  
43

44 **Quality control measures:** The questionnaire was pre-tested using a convenient sample of 20 infants.  
45 Their data was omitted prior to analysis. Content and face validity were established using extensive  
46 literature review and consultation with academic experts in community medicine and experts in the fields  
47 of hematology and pediatrics. In order to prevent any data missing, authors had checked the completeness  
48 of data required within each questionnaire and the questionnaires had given serial numbers to allow  
49 identification of any missing data during data entry. The main researchers did all data entry and review.  
50 Standardized methods of blood collection and automated measures for blood analysis were used to ensure  
51 reliability of the study results. Of the original sample of 350 selected, 44 subjects failed to complete the  
52 laboratory tests therefore their data was excluded from further analysis.  
53  
54  
55  
56  
57

**Ethical considerations:** Ethical approvals were obtained prior to fieldwork from PHCC and HMC ethical review boards. Permission was also obtained from PHCC center directors, as well as, mothers of infants identified for the study. The methodology of the study was fully described to the ethical review board to allow possible inconvenience resulting from extra blood withdrawal. Privacy and confidentiality of participant's data was assured. Mothers were invited to participate voluntarily and allowed to withdraw at any time during the study.

**Patient and Public Involvement:** The development of the research question and outcome measures were informed by published literature on anemia and ID. Patients' priorities, experience and preferences were not directly gathered nor were they involved in designing the study. Customer care service in PHCC (Hayyak team) supported recruitment of patients for the study. There are no plans to disseminate results to the study participants directly. However, it is intended to share the results with WBCs where the study was conducted. It is likely that study participants will become aware of them when they visit WBCs in the future.

## Results

Of the total 350 study participants identified, laboratory data was available for 306 of them giving a response rate of 87.4%, but still over the figure required by calculation for statistical relevance (i.e. n=292). **Figure (1)** demonstrates the prevalence of the dependent variables.

As shown in **Table (1)**, when the relation between ID and background characteristics of the infants was assessed, it was found that ID is more common in males. However the relationship was not statistically significant. There was a statistically significant higher prevalence of ID among Non-Qatari infants compared to their Qatari counterparts.

**Table (1): Relation between ID and infants' background characteristics**

| Characteristic                         | No ID (%)  | ID (%)    | Total | $\chi^2$ | <i>p</i> value |
|----------------------------------------|------------|-----------|-------|----------|----------------|
| <b>Gender</b>                          |            |           |       |          |                |
| Male                                   | 146 (89.6) | 17 (10.4) | 163   | 0.686    | 0.265          |
| Female                                 | 132 (92.3) | 11 (7.7)  | 143   |          |                |
| <b>Nationality</b>                     |            |           |       |          |                |
| Qatari                                 | 57 (98.3)  | 1 (1.7)   | 58    | 4.748    | <b>0.029</b>   |
| Non Qatari                             | 221 (89.1) | 27 (10.9) | 248   |          |                |
| <b>Gestational age</b>                 |            |           |       |          |                |
| Pre-term (< 37 weeks)                  | 23 (88.5)  | 3 (11.5)  | 26    | 0.195    | 0.433          |
| Full-term ( $\geq$ 37 weeks)           | 255 (91.1) | 25 (8.9)  | 280   |          |                |
| <b>Birth weight</b>                    |            |           |       |          |                |
| Low (< 2500 grams)                     | 18 (90)    | 2 (10.0)  | 20    | 0.019    | 0.565          |
| Normal ( $\geq$ 2500 grams)            | 260 (90.9) | 26 (9.1)  | 286   |          |                |
| <b>Mode of child delivery</b>          |            |           |       |          |                |
| Normal                                 | 183 (91.5) | 17 (8.5)  | 200   | 0.294    | 0.364          |
| Caesarean section                      | 95 (89.6)  | 11 (10.4) | 106   |          |                |
| <b>Twins, triple or multiple birth</b> |            |           |       |          |                |
| No                                     | 270 (90.6) | 28 (9.4)  | 298   | 0.827    | 0.460          |
| Yes, twins                             | 8 (100)    | 0 (0)     | 8     |          |                |

In terms of background characteristics of parents, the relation of ID with mother's employment status and the family income were found to be statistically significant, as shown in **Table (2)**.

**Table (2): Relation between ID and infants parents background characteristics**

| Characteristic                                              | No ID (%)  | ID (%)    | Total | $\chi^2$ | <i>p</i> value |
|-------------------------------------------------------------|------------|-----------|-------|----------|----------------|
| <b>Mother's age</b>                                         |            |           |       |          |                |
| ≤ 25 years                                                  | 55 (88.7)  | 7 (11.3)  | 62    | 0.778    | 0.678          |
| 26 – 35 years                                               | 182 (91.9) | 16 (8.1)  | 198   |          |                |
| More than 35 years                                          | 41 (89.1)  | 5 (10.9)  | 46    |          |                |
| <b>Number of mother's pregnancy (including miscarriage)</b> |            |           |       |          |                |
| < 4                                                         | 187 (91.2) | 18 (8.8)  | 205   | 0.102    | 0.749          |
| > 4                                                         | 91 (90.1)  | 10 (9.9)  | 101   |          |                |
| <b>Mother's education level</b>                             |            |           |       |          |                |
| Illiterate                                                  | 6 (75.0)   | 2 (25.0)  | 8     | 3.598    | 0.165          |
| Up to secondary school                                      | 91 (93.8)  | 6 (6.2)   | 97    |          |                |
| University educated and above                               | 181 (90.0) | 20 (10.0) | 201   |          |                |
| <b>Father's education level</b>                             |            |           |       |          |                |
| Up to secondary school                                      | 93 (93.0)  | 7 (7.0)   | 100   | 0.826    | 0.246          |
| University educated and above                               | 185 (89.8) | 21 (10.2) | 206   |          |                |
| <b>Mother's employment status</b>                           |            |           |       |          |                |
| Housewife                                                   | 186 (87.3) | 27 (12.7) | 213   | 10.480   | ≤ 0.05         |
| Working job                                                 | 92 (98.9)  | 1 (1.1)   | 93    |          |                |
| <b>Father's occupation</b>                                  |            |           |       |          |                |
| Manual worker                                               | 31 (91.2)  | 3 (8.8)   | 34    | 1.904    | 0.593          |
| Clerk/administrative                                        | 85 (87.6)  | 12 (12.4) | 97    |          |                |
| Professional                                                | 118 (92.9) | 9 (7.1)   | 127   |          |                |
| Others                                                      | 44 (91.7)  | 4 (8.3)   | 48    |          |                |
| <b>Total number of children in the family</b>               |            |           |       |          |                |
| 1                                                           | 81 (94.2)  | 5 (5.8)   | 86    | 2.140    | 0.343          |
| 2-3                                                         | 134 (90.5) | 14 (9.5)  | 148   |          |                |
| More than 3                                                 | 63 (87.5)  | 9 (12.5)  | 72    |          |                |
| <b>Family income in Qatari Riyals (QR)</b>                  |            |           |       |          |                |
| Up to 10000 QR                                              | 107 (82.9) | 22 (17.1) | 129   | 17.369   | ≤ 0.05         |
| 10001-20000 QR                                              | 99 (95.2)  | 5 (4.8)   | 104   |          |                |
| More than 20000 QR                                          | 72 (98.6)  | 1 (1.4)   | 73    |          |                |

**Table (3)** shows several statistically significant relations between ID in infants and their feeding practice and iron supplementation.

**Table (3): Relation between ID and feeding practice**

| Characteristic                              | No ID (%)  | ID (%)    | Total | $\chi^2$ | <i>p</i> value |
|---------------------------------------------|------------|-----------|-------|----------|----------------|
| <b>Exclusive breastfeeding for 6 months</b> |            |           |       |          |                |
| Yes                                         | 51 (81.0)  | 12 (19.0) | 63    | 7.915    | 0.007          |
| No                                          | 208 (92.9) | 16 (7.1)  | 224   |          |                |

|                                                                          |            |           |     |        |              |
|--------------------------------------------------------------------------|------------|-----------|-----|--------|--------------|
| <b>Frequency of breastfeeding</b>                                        |            |           |     |        |              |
| All or almost all feeds                                                  | 142 (86.1) | 23 (13.9) | 165 |        |              |
| About half of all feeds                                                  | 76 (93.8)  | 5 (6.2)   | 81  | 8.893  | <b>0.012</b> |
| Few feeds since was born                                                 | 41 (100.0) | 0 (0)     | 41  |        |              |
| <b>Continuation of breastfeeding at one year</b>                         |            |           |     |        |              |
| Yes                                                                      | 115 (82.7) | 24 (17.3) | 139 |        |              |
| No                                                                       | 144 (97.3) | 4 (2.7)   | 148 | 17.268 | $\leq 0.05$  |
| <b>Breastfeeding intake within the last 24 hours</b>                     |            |           |     |        |              |
| Yes                                                                      | 112 (82.4) | 24 (17.6) | 136 |        |              |
| No                                                                       | 147 (97.4) | 4 (2.6)   | 151 | 18.281 | $\leq 0.05$  |
| <b>Ever take infant formula milk (n= 306)</b>                            |            |           |     |        |              |
| Yes                                                                      | 225 (95.3) | 11 (4.7)  | 236 |        |              |
| Never                                                                    | 53 (75.7)  | 17 (24.3) | 70  | 25.011 | $\leq 0.05$  |
| <b>Age at introducing of any solid, semi-solid or soft food (n= 306)</b> |            |           |     |        |              |
| Less than 6 months                                                       | 72 (91.1)  | 7 (8.9)   | 79  |        |              |
| 6 months or more                                                         | 206 (90.7) | 21(9.3)   | 227 | 0.011  | 0.917        |
| <b>Ever take iron supplementation (n= 306)</b>                           |            |           |     |        |              |
| Yes                                                                      | 27 (96.4)  | 1 (3.6)   | 28  |        |              |
| No                                                                       | 251 (90.3) | 27 (9.7)  | 278 | 1.154  | 0.283        |

The differences in mean frequency of consumption for different groups of food is shown in **Table (4)**, where infants diagnosed with ID consumed less plant foods rich in iron, and the difference was statistically significant. However, the difference was not significant for animal sources of iron and the overall score of food frequency.

**Table (4): Relation between ID and food frequency score**

| Food item                    | Mean $\pm$ SD  |                 | Student's <i>t</i> test | <i>p</i> value |
|------------------------------|----------------|-----------------|-------------------------|----------------|
|                              | No ID          | ID              |                         |                |
| <b>Overall score</b>         | 21.2 $\pm$ 3.9 | 19.89 $\pm$ 4.0 | 1.64                    | 0.12           |
| <b>Animal Source of iron</b> | 7.9 $\pm$ 2.3  | 7.9 $\pm$ 2.2   | 0.02                    | 0.98           |
| <b>Plant source of iron</b>  | 13.2 $\pm$ 2.8 | 11.9 $\pm$ 2.7  | 2.26                    | <b>0.03</b>    |

When the relation between ID and infant feeding counseling for mothers was assessed, there was a significant relationship between receiving counseling and ID occurrence, as the prevalence of ID was higher among infants to mothers didn't receive feeding counseling compared to infants of mothers received such counseling (13.4 against 4.2%) respectively, with ( $\chi^2= 7.731$  and  $p= 0.005$ ).

From the BMI for age based on z-score, ID prevalence was variable among different BMI groups.[35, 36] It was as high as 16.7% among wasted/severely wasted infants, 9.7% among infants at risk of overweight, 9.4% among infants with normal BMI and as low as 5.6% among the overweight/obese group of infants. These relationships were not statistically significant ( $\chi^2= 1.007$  and  $p= 0.799$ ).

## Discussion

This is the first population-based descriptive epidemiological study to estimate the prevalence and associated factors of ID and IDA in infants in Qatar. We found a prevalence of anemia, ID and IDA among infants of 23.5%, 9.2% and 7.8% respectively, which is much lower than the published global prevalence.[37]

Being a cross-sectional study temporality cannot be assessed. Assessing parental/care-giver feeding practices retrospectively is prone to recall bias. Other potential limitations include the use of single rather than combined indicators of anemia (i.e. Hb) and serum ferritin and CRP for IDA. Other measurements of anemia might have included zinc protoporphyrin and iron deficiency could also be confirmed by microscopy (microcytic, hypochromic cells) and measurement of total iron binding capacity (TIBC). Such measurements might help to reduce the potential for under or overestimating prevalence of anemia, ID and IDA. Differences in the applied diagnostic criteria and laboratory cutoff values in identification of anemia, ID and IDA across different studies also limit the ability of a precise comparison.

Comparing these findings with figures published for other countries of the EMR, it appears that many of them have an even higher burden of disease. The WHO report, 2013 also showed no improvement in the overall anemia situation among pre-schoolers where 63% of children under the age of 5 years had IDA.[16, 38] The prevalence of anemia, ID and IDA in our study was also lower than in the United Arab Emirates, Kuwait and Saudi Arabia.[29, 39, 40] A study conducted in Raparin teaching hospital for children in Erbil - Iraq, 2007, among infants aged (12 - 24) months, showed that the prevalence of ID ranged between 51.9% and 48.1%. It also showed that about 53% and 30 % of participants had anemia and IDA respectively.[41]

Qatar has implemented a well-developed and comprehensive well baby program at PHC centers. In a study undertaken in 2011 at Ain Shams University Children's Hospital in Egypt which included three hundred poor Egyptian infants, anemia was diagnosed in 66% of the participants aged between 6 and 24 months, and among them, 43% had IDA.[42] This high prevalence rate may be due to the selection of a high-risk group for the study. Similar results were also seen in Kassala (Eastern Sudan) where up to 86% of young children less than three years of age living were diagnosed with IDA.[43]

On the other hand, the prevalence of anemia, ID and IDA found in this study is still high compared to many developed countries. Male *C et al*, 2001 showed that the prevalence of anemia, ID and IDA was 9.4%, 7.2% and 2.3% respectively.[24] The difference in prevalence compared to this study may be attributed to the cut-off point of SF, the eligibility criteria and/or the disease determinants between the two populations. A study from Estonia undertaken between July 2002 to March 2005 of 171 infants aged 9 to 12 months, found a prevalence of ID and IDA of 14.0% and 9.4, % respectively. The study utilized a cut-off value for Hb of <10.5 g/dl and for serum ferritin of <12  $\mu$ g/L.[28]



1  
2  
3  
4  
5  
6  
7  
8  
9  
10  
11  
12  
13  
14  
15  
16  
17  
18  
19  
20  
21  
22  
23  
24  
25  
26  
27  
28  
29  
30  
31  
32  
33  
34  
35  
36  
37  
38  
39  
40  
41  
42  
43  
44  
45  
46  
47  
48  
49  
50  
51  
52  
53  
54  
55  
56  
57  
58  
59  
60

In relation to the potential determinants of ID in this study, gender did not appear to be a factor as there was no statistically significant difference between male and female participants. This is consistent with Vendt *et al*,2007.[28] However , in a study from Iran, of 33 cases diagnosed with IDA, 26 children (78.8%) were males and the prevalence of IDA was statistically significant among male compared with female infants ( $p = 0.015$ ).[44] Another study of 201 infants in Iran showed a prevalence of IDA of 61.5% among male infants. Employing a multiple logistic regression model, the researchers reported that male gender was the most important ID risk factor in their study (OR = 3.3; 95% CI 1.7-6.3; and  $p < 0.001$ ).[45]

In this study, we found a statistically significant higher prevalence of ID among non-Qatari infants compared to their Qatari counterparts. This difference can be attributed to possible difference in economic, social and/or nutritional attributes. ID was more common among those infants born pre-term compared to infants born full term. However, this result is not statistically significant. In other studies from Canada, prematurity and intra-uterine growth retardation were shown to be risk factors for ID and IDA associated with low hepatic and bone marrow iron stores at birth.[18] A clinical report from the American Academy of Pediatrics indicated that the deficit of total body iron in preterm infants increases with decreasing gestational age, is worsened by the rapid postnatal growth that many infants experience and by frequent phlebotomies without adequate blood replacement. All these are risk factors for ID. [3]

Infants with low birth weight were shown to be more prone to ID compared to those born with normal weight. This finding is similar to a study conducted in Estonia where the mean birth weight among the iron deficient group was significantly lower than that in the control group. [28]

Concerning the infant's mode of delivery in this study, those infants born through caesarean section showed higher risk of iron deficiency than those born through normal delivery. This finding is consistent with results of a systematic review and meta-analysis which synthesized evidence that compared with vaginal delivery, caesarean section is associated with reduced placental transfusion and poor iron-related hematologic indices in both cord and peripheral blood. This in turn indicates that neonates delivered by caesarean section might be more likely to develop iron deficiency anemia later in infancy compared to their normally delivered counterparts.[30]

In this study, ID was more common among infants born to younger mothers aged 25 years or less (11.3%) compared to among infants of mothers aged 26 - 35 years (8.1%) and for infants of mothers aged more than 35 years (10.9%). Similarly an exploratory descriptive study conducted in Egypt with 400 healthy children aged 12 to 24 months reported that iron deficiency was more prevalent among infants of mothers aged 20-29 years old (67.2%) compared with infants of mothers aged more than 30 years (22.4%) and infants of mothers aged less than 20 years old (10.4%).[46] An explanation for this may be related to the lack of infant feeding experience of young mothers . We found that ID was more common among infants born to illiterate mothers compared to mothers with higher education. However, the findings were not statistically significant. Similarly, the relationship with parental education was not statistically significant. Our findings are similar to a study which showed a statistically significant difference between IDA among children below the age of two years and the level of parental education. In that study, the highest percentage of anemia cases (32.1%) were found in infants of illiterate mothers ( $\chi^2=21.775$  and  $p = 0.0001$ ).[46]

1  
2  
3  
4 On the contrary, a study from Iran reported that educational level of the mother did not have an effect  
5 on the iron status of infants. [44] Our study also showed that ID was more prevalent among infants born  
6 to mothers who were housewives compared to those born to working mothers, and the relationship was  
7 statistically significant. This finding is consistent with the results of a study conducted in Alexandria,  
8 Egypt, where 88.4% of infants born to non-working mothers had IDA compared to only 15.4% of those  
9 born to working mothers.[46] The difference could be explained by possible higher education and  
10 knowledge among working mothers compared to housewives, and thus better feeding practices and/or that  
11 working mothers are more reliant on formula feeding and breastfeed less compared to their housewife  
12 counterparts.  
13  
14  
15

16  
17 Prevalence of IDA in infants from families with more than three children was high compared to those  
18 infants born to families with 2-3 children and to families with only one child. This corroborates a study  
19 undertaken in Iraq where low serum iron was found in children from families which had 4 children or  
20 more compared to families that had less than 4 children.[41] However, a study conducted in Iran in 2007  
21 reported no significant difference between IDA prevalence and the total number of children in the  
22 infant's family ( $P > 0.05$ ).[44]  
23  
24

25 The relationship between ID and history of exclusive breastfeeding for six months, frequency of  
26 breastfeeding, continued breastfeeding at one year and intake of breast milk within 24 hours prior to the  
27 interview were statistically significant in this study. Similar results were found in a study from Estonia in  
28 which infants exclusively breastfed until the age of 6 months had significantly lower Hb and ferritin  
29 levels compared to those exclusive breastfed only until the age of 3 months.[28] Other studies have  
30 reported prevalence rates of IDA of 27% in infants exclusively breastfed up to 6 months, 16.7% in infants  
31 fed with formula milk and 100% in infants fed with cow's milk ( $p=0.033$ ).[44] The figures appear to  
32 reflect the iron content of different types of milk with levels higher in formula milk (fortified with iron)  
33 and relatively low in breast milk and fresh cow's milk. Prolonged exclusive breastfeeding has been  
34 suggested to decrease the intake of dietary iron, which in turn leads to iron deficiency especially in  
35 growing infants beyond the age of 6 months when the needs for iron may not be adequately met by  
36 continuation of exclusive breastfeeding.[18-22] In South Korea a study of 87 healthy full-term infants  
37 showed that at 6 months of age, the incidences of ID and IDA in breast-fed only infants were 33% and  
38 30%, respectively, significantly higher than formula fed (8% and 5%, respectively) and those breast-fed  
39 with iron supplementation (7% and 5%, respectively). At 12 months of age, the incidences of ID and IDA  
40 in breastfed were 64% and 50%, respectively, again significantly higher than the other groups. [23] The  
41 established reason is the beneficiary influence of the iron fortifying formula milks on the infants' stores of  
42 iron as demonstrated in many studies.[18,47]  
43  
44  
45  
46  
47

48 In the current study, mothers were asked about frequency of consumption of different food items rich  
49 in iron, which was used to calculate the food frequency score derived from a previous study conducted in  
50 Qatar.[48] The findings showed that infants who suffered ID consumed less plants rich in iron compared  
51 to their counterparts without ID, and the difference was statistically significant ( $t$  test= 2.26 and  $p= 0.03$ ).  
52 No significant differences were found when studying animal sources of iron and the overall score of food  
53 frequency. This finding supports mentioned previous Qatari study in which ID was more common among  
54 pregnant women with high consumption of food items containing iron of plant sources ( $t$  test= 0.2 and  $p=$   
55  
56  
57  
58  
59  
60

0.834) compared to food items containing iron of animal sources ( $t$  test= 1.6 and  $p$ = 0.100). They related this to less bio-available iron in food items of plant origin compared to animal origin.

Our finding of higher prevalence of ID among infants who started solid, semi-solid or soft food at age of 6 months or later compared to those who started before the age of 6 months is similar to the results of other studies where infants fed with solid food before 6 months had statistically higher Hb values than those who were introduced to solid food after 6 months of life.[25,28,47]

Infants on iron supplementation were less likely to be iron deficient in this study. This finding supported by a study where infants with iron supplementation had higher Hb concentration and higher MCV.[3] In another study conducted on 126 infants divided into 3 groups, where 86 cases received iron supplementation irregularly, 27 cases regularly and 13 cases never received iron, IDA in the first group was 26.7%, 3.7% in the second group and 69.2% in the third group who never received any iron supplementation. The relationship between IDA and no iron supplementation was statistically significant ( $p$ < 0.001).[44] Similarly, significantly lower ferritin concentrations in 6-month-old infants have been reported in infants who were exclusively breastfed compared to infants who were breastfed and took iron supplementation.[18]

We found a significant relationship between maternal infant feeding counseling and prevalence of ID. In a previous US study, ID prevalence decreased among African American children aged 1-3 years old, from 16% to 6% between years 1976 and 2002. This marked decline was attributed to implementation of the Women, Infants and Children Program which targeted specific groups of mothers and families with counseling, and this led to improvement in infant feeding practices to prevent ID.[46]

Our finding of higher ID prevalence among infants born to mothers with a history of having four pregnancies (9.9%) or more, compared to infants born to mothers with less than four pregnancies (8.8%) may be attributed to the possible depletion of the mother's body stores of iron, especially with multiple tightly close pregnancies.[18,44]

Iron deficiency prevalence was variable among different infant BMI groups. These relations were statistically insignificant. On the other hand, a study conducted in the US indicated that overweight children (1-3 years old) had triple the odds of ID prevalence compared with normal weight or underweight children and ID prevalence remained consistently high for overweight children at 20% to 24%.[49] A second study from the US showed that ID prevalence was 20% among those with overweight, 8% for those at risk for overweight, and 7% for normal-weight toddlers (1-3 years old).[50] The possible explanation to this contradiction with the results seen in the two US studies is that, anemia, ID and IDA are mostly related to the imbalance between iron needs and dietary sources of iron, rather than the relation with the caloric content of infant's nutrition or body composition. In this study, we had a very small insignificant number of participating infants who were wasted or severely wasted.

To the best of our knowledge, this is the first population-based study about ID and IDA among infants in Qatar covering a critical age of infancy (12 months). As PHCC is the main provider of WBC services in Qatar the findings provide useful baseline data which can be used in future studies including a critical look at the impact of infant feeding practices especially prolonged exclusive breastfeeding in low income families.

## Conclusion

Although ID and IDA among infants in the State of Qatar are less prevalent compared to several developing countries including those in the EMR, they are still relatively higher than rates seen in the developed ones. The prevalence of anemia in this study was 23.5%, ID was 9.2% and IDA was 7.8%. ID was significantly associated with non-Qatari infants, those whose mothers were un-employed or belonged to a family with low total monthly income. Infants exclusively breastfed for 6 months, breastfed more frequently, and those who continued breastfeeding at the age of one year, or who never took infant formula milk were also at higher risk. Furthermore, those who frequently consumed plant sources of dietary iron and had a mother that did not receive infant feeding counseling were at greater risk of ID and IDA.

We believe that these findings are worth further exploration and that they fill gaps in our current knowledge and can help us to plan public health interventions at national as well as regional level in the Gulf Cooperation Council (GCC) countries.

## Recommendations

Longitudinal studies in a larger cohort to confirm these findings would be useful in helping to better understand the extent of the problem in Qatar and other countries of the Gulf Cooperation Council (GCC) region which share a similar structure, culture, behavior and sociodemographic characteristics.

Integration of mass ID and IDA screening prior to 12 months visit to allow for early intervention in addition to proper counseling regarding breast feeding and proper weaning practice is also recommended.

## Acknowledgments

We are extremely grateful to all the mothers who took part in this study, the staff of the WBCs, customer care service in PHCC (Hayyak team) and data collectors for their support and guidance. We also thank Dr. Rajvir Singh for his invaluable statistical assistance.

## Ethical approval

Appropriate approvals obtained from the Arab Board of Medical Specialization, Institutional Review Board of HMC and the PHCC Research Committee.

## Funding

The funding of this study is received from the Research Center at HMC, state of Qatar.

## Patient consent

Mothers of participants were consented in written after appropriate description of the study aim and value.

## Competing interest

None declared.

## Figure legends

**Figure (1):** Among the three hundred and six infants of completed 12 months of age and lesser than 13 months; 72 (23.5%) had anemia which defined as hemoglobin <11.1 g/dl (normal reference range is 11.1-14.1 g/dl), 28 (9.2%) had iron deficiency (ID) which defined as Serum Ferritin (SF) below normal reference range (6-24 ug/L) in absence of high C-Reactive Protein (CRP), and 24 (7.8%) had iron deficiency anemia (IDA) which defined by combination of three elements - hemoglobin <11.1 g/dl (normal reference range is 11.1-14.1 g/dl), low SF (<6 mcg/L) and absence of high CRP (reference level is normally less than 5 mg/L).

## Data sharing statement

No additional data are available.

## Contribution to authorship

AJZ, NAS and SAK designed the study and wrote the primary proposal. AJZ and SAK managed data collection and fieldwork. SRO and AJZ did literature review, data analysis, results interpretation and wrote the discussion. AJZ, SRO and NAS drafted and revised the manuscript. AJZ finalized and submitted the manuscript.

## References

1. Worldwide prevalence of anaemia, WHO Vitamin and Mineral Nutrition Information System, 1993–2005. WHO press 2008. Available from: <http://www.who.int/nutrition/publications/micronutrients/PHNmay2008.pdf> (accessed 20 May 2014)
2. Zetterström R, Iron deficiency and iron deficiency anaemia during infancy and childhood. *Acta Paediatr* 2004;93(4):436-9.
3. Robert D, Baker MD, Frank R, et al. Clinical Report: Diagnosis and Prevention of Iron Deficiency and Iron-Deficiency Anemia in Infants and Young Children (0 –3 Years of Age). *AAP*2010;126:1040-50.
4. Halterman JS, Kaczorowski JM, Aligne CA, et al. Iron deficiency and cognitive achievement among school-aged children and adolescents in the United States. *Pediatrics* 2001;107:138-386.
5. Szajewska H, Rusczyński M, Chmielewska A. Effects of iron supplementation in non-anemic pregnant women, infants, and young children on the mental performance and psychomotor development of children: a systematic review of randomized controlled trials. *Am J Clin Nutr* 2010;91:1684-90.
6. Anaemia. WHO. 2013. [www.who.int/topics/anaemia/en/](http://www.who.int/topics/anaemia/en/) (accessed 22 May 2014)
7. Micronutrient deficiencies. WHO. 2013. [www.who.int/nutrition/topics/ida/en/index.html](http://www.who.int/nutrition/topics/ida/en/index.html) (accessed 18 Jun 2014)
8. World Health Organization. Malnutrition: the global picture. Geneva: The Organization; 2000.



- 1
  - 2
  - 3
  - 4
  - 5
  - 6
  - 7
  - 8
  - 9
  - 10
  - 11
  - 12
  - 13
  - 14
  - 15
  - 16
  - 17
  - 18
  - 19
  - 20
  - 21
  - 22
  - 23
  - 24
  - 25
  - 26
  - 27
  - 28
  - 29
  - 30
  - 31
  - 32
  - 33
  - 34
  - 35
  - 36
  - 37
  - 38
  - 39
  - 40
  - 41
  - 42
  - 43
  - 44
  - 45
  - 46
  - 47
  - 48
  - 49
  - 50
  - 51
  - 52
  - 53
  - 54
  - 55
  - 56
  - 57
  - 58
  - 59
  - 60
9. Yip R. The challenge of improving iron nutrition: limitations and potentials of major intervention approaches. *Eur J Clin Nutr* 1997;51:516-24.
10. Lawson MS, Thomas M, Hardiman A. Iron status of Asian children aged 2 years living in England. *Arch Dis Child* 1998;78:420-26.
11. Karr MA, Mira M, Alperstein G, Labib S, Webster BH, Lammi AT et al. Iron deficiency in Australian-born children of Arabic background in central Sydney. *Med J Aust* 2001;174:165-8.
12. Booth IW, Aukett MA. Iron deficiency anaemia in infancy and early childhood. *Arch Dis Child* 1997;76:549-54.
13. Anemia prevention and control. WHO; 2013. Available from: [http://www.who.int/medical\\_devices/initiatives/anaemia\\_control/en/index.html](http://www.who.int/medical_devices/initiatives/anaemia_control/en/index.html) (accessed 26 May 2014)
14. Stoltzfus RJ. Iron deficiency: global prevalence and consequences. *Food Nutr Bull* 2003 Dec;24(4):S99-103.
15. Mirmiran P, Golzarand M, Serra-Majem L, et al. Iron, Iodine and Vitamin A in the Middle East; A Systematic Review of Deficiency and Food Fortification. *Iranian J Publ Health*. 2012;41(8):8-19.
16. Anaemia. WHO; 2013. [www.emro.who.int/healthtopics/anaemia/index.html](http://www.emro.who.int/healthtopics/anaemia/index.html) (accessed Jun 2014)
17. Dallman PR. Changing iron needs from birth through adolescence. 39. Dallman PR. Changing iron needs from birth through adolescence. In: Fomon SJ, Zlotkin SH, editors. Nutritional anemias. Nestle Nutrition Workshop Series. New York: *Vevey/Raven Press*; 1992:29-38. [www.nestlenutrition-institute.org/docs/default-source/global-document-library/publications/secured/7fe7d3964ce56230a9d3622ffb3a44a5.pdf?sfvrsn=0](http://www.nestlenutrition-institute.org/docs/default-source/global-document-library/publications/secured/7fe7d3964ce56230a9d3622ffb3a44a5.pdf?sfvrsn=0) (accessed 12 Jun 2014)
18. Zlotkin S. Clinical nutrition: 8. The role of nutrition in the prevention of iron deficiency anemia in infants, children and adolescents. *CMAJ*. 2003;168(1):59-63.
19. Dallman PR. Nutritional anemias in childhood: iron, folate and vitamin B12. In: Suskind RM, LewinterSuskind L, eds. Textbook of Pediatric Nutrition. 2nd ed. New York: *Raven Press*; 1993:91-105.
20. Aggett, P. Iron for the suckling. Iron nutrition in childhood. *Acta Paediatr Scand* 1989;78(361):96-102.
21. Kim HJ, Kim DH, Lee EJ, et al. Is It Possible to Predict the Iron Status from an Infant's Diet History?. *Pediatr Gastroenterol Hepatol Nutr* 2013;16(2):95-103.
22. Infant young child feeding counselling: An integrated course. Geneva, Switzerland. WHO. 2006. [whqlibdoc.who.int/publications/2006/9789241594769\\_eng.pdf](http://whqlibdoc.who.int/publications/2006/9789241594769_eng.pdf) (accessed 16 Oct 2014)
23. Noh SJ, Na B, Kim MJ. Iron deficiency and early, low-dose iron supplementation in breastfed infants. *Korean J Pediatr Gastroenterol Nutr* 2008 Sep;11(2):169-78.
24. Male C, Persson LA, Freeman V, et al. Prevalence of iron deficiency in 12-mo-old infants from 11 European areas and influence of dietary factors on iron status (Euro-Growth study). *Acta Paediatr* 2001 May;90(5):492-8.
25. Chang JH, Cheong WS, Jun YH, et al. Weaning food practice in children with iron deficiency anemia. *Korean J Pediatr* 2009 Feb;52(2):159-66.
26. Global Strategy for Infant and Young Child Feeding, 2013. WHO. [www.who.int/nutrition/topics/global\\_strategy/en/index.html](http://www.who.int/nutrition/topics/global_strategy/en/index.html) (accessed 16 Oct 2014)
27. Infant and young children feeding, a tool for assessing national practices, policies and programmes. WHO publications. [http://www.who.int/nutrition/publications/inf\\_assess\\_nnp\\_ref\\_eng.pdf](http://www.who.int/nutrition/publications/inf_assess_nnp_ref_eng.pdf)
28. Vendt N, Grünberg H, Leedo S, et al. Prevalence and causes of iron deficiency anemias in infants aged 9 to 12 months in Estonia. *NCBI* 2007;43(12):947-52.
29. Miller CJ, Dunn EV, Abdouni SF, et al. Factors associated with iron depletion and iron deficiency anemia among Arabic preschool children of the United Arab Emirates. *Saudi Med J* 2004 Jul;25(7):843-7.



30. Zhou YB, Li HT, Zhu LP, Liu JM. Impact of cesarean section on placental transfusion and iron-related hematological indices in term neonates: a systematic review and meta-analysis. *Epub* 2014;35(1):1-8.
31. Eden AN, Sandoval C. Iron deficiency in infants and toddlers in the United States. *Pediatr Hematol Oncol* 2012;29:704-9.
32. Altuntas N, Beken S, Kulali F, et al. Prevalence of iron deficiency at the first age of the infants hospitalized in neonatal period. *Transfus Apher Sci* 2012;47:85-9.
33. Iron Deficiency Anaemia Assessment, Prevention and Control: A guide for programme manager. *WHO press* 2001; WHO/NHD/01.3.  
[www.who.int/nutrition/publications/micronutrients/anaemia\\_iron\\_deficiency/WHO\\_NHD\\_01.3/en/](http://www.who.int/nutrition/publications/micronutrients/anaemia_iron_deficiency/WHO_NHD_01.3/en/) (accessed 16 Oct 2014)
34. PHCC. Well baby clinic protocol. Doha, Qatar: *PHCC*; 2011.
35. World Health Organization. WHO Child Growth Standards: Methods and development. Geneva: World Health Organization, 2006. Available from:  
[http://www.who.int/childgrowth/standards/Technical\\_report.pdf?ua=1](http://www.who.int/childgrowth/standards/Technical_report.pdf?ua=1) (accessed 15 Jun 2014)
36. World Health Organization. Training Course on Child Growth Assessment. Geneva, WHO, 2008. Available from:  
[http://www.who.int/childgrowth/training/module\\_c\\_interpreting\\_indicators.pdf](http://www.who.int/childgrowth/training/module_c_interpreting_indicators.pdf) (accessed 15 Jun 2014)
37. Stevens GA, Finucane MM, De-Regil LM, et al. Global, regional, and national trends in haemoglobin concentration and prevalence of total and severe anaemia in children and pregnant and non-pregnant women for 1995–2011: a systematic analysis of population-representative data. *Lancet Glob Health* 2013 Jul;1(1):e16-e25.
38. Bagchi K. Nutrition in the Eastern Mediterranean Region of the World Health Organization. *EMHJ* 2008;14:S107-S113.
39. Babiker MA, Bahakim HM, al-Omair AO, et al. Prevalence of iron deficiency in Saudi children from birth to 15 months of age. *Ann Trop Paediatr* 1989;9:111-4.
40. Assiri F, Al-Sumaie M, Safar F, et al. Prevalence and associated factors of iron deficiency anemia among Kuwaiti children. *Bull Alex Fac Med* 2006;42(2).
41. Alkhateeb N. Risk factors associated with iron deficiency among children admitted to paediatric emergency unit in Erbil, Iraq. *Zanco J Med Sci* 2010;14(3):1-8.
42. Elalfy MS, Hamdy AM, Maksoud SS, et al. Pattern of milk feeding and family size as risk factors for iron deficiency anemia among poor Egyptian infants 6 to 24 months old. *Nutr Res* 2012;32(2):93-9.
43. Mahmoud H, Muddathir A, Osman S, et al. Iron deficiency anemia among children under three years in Kassala, Eastern Sudan. *Sudanese journal of public health* 2014;9:33-7.
44. Monajemzadeh SM, Zarkesh MR. Iron deficiency anemia in infants aged 12-15 months in Ahwaz, Iran. *Indian J Pathol Microbiol* 2009;52:182-4.
45. Antunes H, Santos C, Carvalho S, et al. male gender is an important clinical risk factor for iron deficiency in healthy infants. *Clinical Nutrition ESPEN* 2012;7(6):e219-e222.
46. Mohamed A, abo-donia A. Contributing factors of iron deficiency anemia among children under two years attending family health centers in Alexandria. *Life Science Journal* 2011;8(4):996-1007.
47. Shaw V, McCrann U. Infant feeding: weaning. London, UK: Great Ormond Street Hospital; 2012.  
[www.gosh.nhs.uk/health-professionals/clinicalguidelines/infant-feeding-eaning/#Rationale](http://www.gosh.nhs.uk/health-professionals/clinicalguidelines/infant-feeding-eaning/#Rationale) (accessed 17 Oct 2014)
48. Al-Mass M, Selim NA, Al-Kuwari M, Ismail MS. Assessment of Anemia, IDA and ID among Pregnants in Qatar: Cross Sectional Survey. *SM J Public Health Epidemiol* 2016; 2(3): 1035.
49. Brotanek JM, Gosz J, Weitzman M, et al. Secular trends in the prevalence of iron deficiency among US toddlers, 1976-2002. *Arch Pediatr Adolesc Med* 2008 Apr;162(4):374-81.
50. Brotanek JM, Gosz J, Weitzman M, Flores G. Iron deficiency in early childhood in the United States: risk factors and racial/ethnic disparities. *Pediatrics* 2007 Sep;120(3):568-75.

1  
2  
3  
4  
5  
6  
7  
8  
9  
10  
11  
12  
13  
14  
15  
16  
17  
18  
19  
20  
21  
22  
23  
24  
25  
26  
27  
28  
29  
30  
31  
32  
33  
34  
35  
36  
37  
38  
39  
40  
41  
42  
43  
44  
45  
46  
47  
48  
49  
50  
51  
52  
53  
54  
55  
56  
57  
58  
59  
60



Figure (1): Distribution of study infants according to their anemia, iron deficiency and iron deficiency anemia status

81x60mm (300 x 300 DPI)

Only

STROBE Statement—Checklist of items that should be included in reports of *cross-sectional studies*

|                              | Item No | Recommendation                                                                                                                                                                                    | Page  |
|------------------------------|---------|---------------------------------------------------------------------------------------------------------------------------------------------------------------------------------------------------|-------|
| <b>Title and abstract</b>    | 1       | (a) Indicate the study's design with a commonly used term in the title or the abstract                                                                                                            | 1, 2  |
|                              |         | (b) Provide in the abstract an informative and balanced summary of what was done and what was found                                                                                               | 2     |
| <b>Introduction</b>          |         |                                                                                                                                                                                                   |       |
| Background/rationale         | 2       | Explain the scientific background and rationale for the investigation being reported                                                                                                              | 2 - 4 |
| Objectives                   | 3       | State specific objectives, including any prespecified hypotheses                                                                                                                                  | 4     |
| <b>Methods</b>               |         |                                                                                                                                                                                                   |       |
| Study design                 | 4       | Present key elements of study design early in the paper                                                                                                                                           | 4     |
| Setting                      | 5       | Describe the setting, locations, and relevant dates, including periods of recruitment, exposure, follow-up, and data collection                                                                   | 4     |
| Participants                 | 6       | (a) Give the eligibility criteria, and the sources and methods of selection of participants                                                                                                       | 4     |
| Variables                    | 7       | Clearly define all outcomes, exposures, predictors, potential confounders, and effect modifiers. Give diagnostic criteria, if applicable                                                          | 4, 5  |
| Data sources/<br>measurement | 8*      | For each variable of interest, give sources of data and details of methods of assessment (measurement). Describe comparability of assessment methods if there is more than one group              | 5     |
| Bias                         | 9       | Describe any efforts to address potential sources of bias                                                                                                                                         | 5     |
| Study size                   | 10      | Explain how the study size was arrived at                                                                                                                                                         | 4     |
| Quantitative variables       | 11      | Explain how quantitative variables were handled in the analyses. If applicable, describe which groupings were chosen and why                                                                      | 5     |
| Statistical methods          | 12      | (a) Describe all statistical methods, including those used to control for confounding                                                                                                             | 5     |
|                              |         | (b) Describe any methods used to examine subgroups and interactions                                                                                                                               | NA    |
|                              |         | (c) Explain how missing data were addressed                                                                                                                                                       | 5     |
|                              |         | (d) If applicable, describe analytical methods taking account of sampling strategy                                                                                                                | NA    |
|                              |         | (e) Describe any sensitivity analyses                                                                                                                                                             | NA    |
| <b>Results</b>               |         |                                                                                                                                                                                                   |       |
| Participants                 | 13*     | (a) Report numbers of individuals at each stage of study—eg numbers potentially eligible, examined for eligibility, confirmed eligible, included in the study, completing follow-up, and analysed | 6 - 8 |
|                              |         | (b) Give reasons for non-participation at each stage                                                                                                                                              | 6     |
|                              |         | (c) Consider use of a flow diagram                                                                                                                                                                | NA    |
| Descriptive data             | 14*     | (a) Give characteristics of study participants (eg demographic, clinical, social) and information on exposures and potential confounders                                                          | 6 - 8 |
|                              |         | (b) Indicate number of participants with missing data for each variable of interest                                                                                                               | NA    |
| Outcome data                 | 15*     | Report numbers of outcome events or summary measures                                                                                                                                              | 6     |
| Main results                 | 16      | (a) Give unadjusted estimates and, if applicable, confounder-adjusted estimates and their precision (eg, 95% confidence interval). Make clear                                                     | NA    |

|                          |    |                                                                                                                                                                            |        |
|--------------------------|----|----------------------------------------------------------------------------------------------------------------------------------------------------------------------------|--------|
|                          |    | which confounders were adjusted for and why they were included                                                                                                             |        |
|                          |    | (b) Report category boundaries when continuous variables were categorized                                                                                                  | 6 - 8  |
|                          |    | (c) If relevant, consider translating estimates of relative risk into absolute risk for a meaningful time period                                                           | NA     |
| Other analyses           | 17 | Report other analyses done—eg analyses of subgroups and interactions, and sensitivity analyses                                                                             | NA     |
| <b>Discussion</b>        |    |                                                                                                                                                                            |        |
| Key results              | 18 | Summarise key results with reference to study objectives                                                                                                                   | 9      |
| Limitations              | 19 | Discuss limitations of the study, taking into account sources of potential bias or imprecision. Discuss both direction and magnitude of any potential bias                 | 9      |
| Interpretation           | 20 | Give a cautious overall interpretation of results considering objectives, limitations, multiplicity of analyses, results from similar studies, and other relevant evidence | 9 - 12 |
| Generalisability         | 21 | Discuss the generalisability (external validity) of the study results                                                                                                      | 12     |
| <b>Other information</b> |    |                                                                                                                                                                            |        |
| Funding                  | 22 | Give the source of funding and the role of the funders for the present study and, if applicable, for the original study on which the present article is based              | 13     |

\*Give information separately for exposed and unexposed groups.

**Note:** An Explanation and Elaboration article discusses each checklist item and gives methodological background and published examples of transparent reporting. The STROBE checklist is best used in conjunction with this article (freely available on the Web sites of PLoS Medicine at <http://www.plosmedicine.org/>, Annals of Internal Medicine at <http://www.annals.org/>, and Epidemiology at <http://www.epidem.com/>). Information on the STROBE Initiative is available at [www.strobe-statement.org](http://www.strobe-statement.org).
